# Supplementary material for: Isolation and analysis of the genetic diversity of repertoires of VSG expression site containing telomeres from Trypanosoma brucei gambiense, T. b. brucei and T. equiperdum
Source: PubMed Central journal article supplement (PMC2533676; doi:10.1186/1471-2164-9-385), 2008-08-12

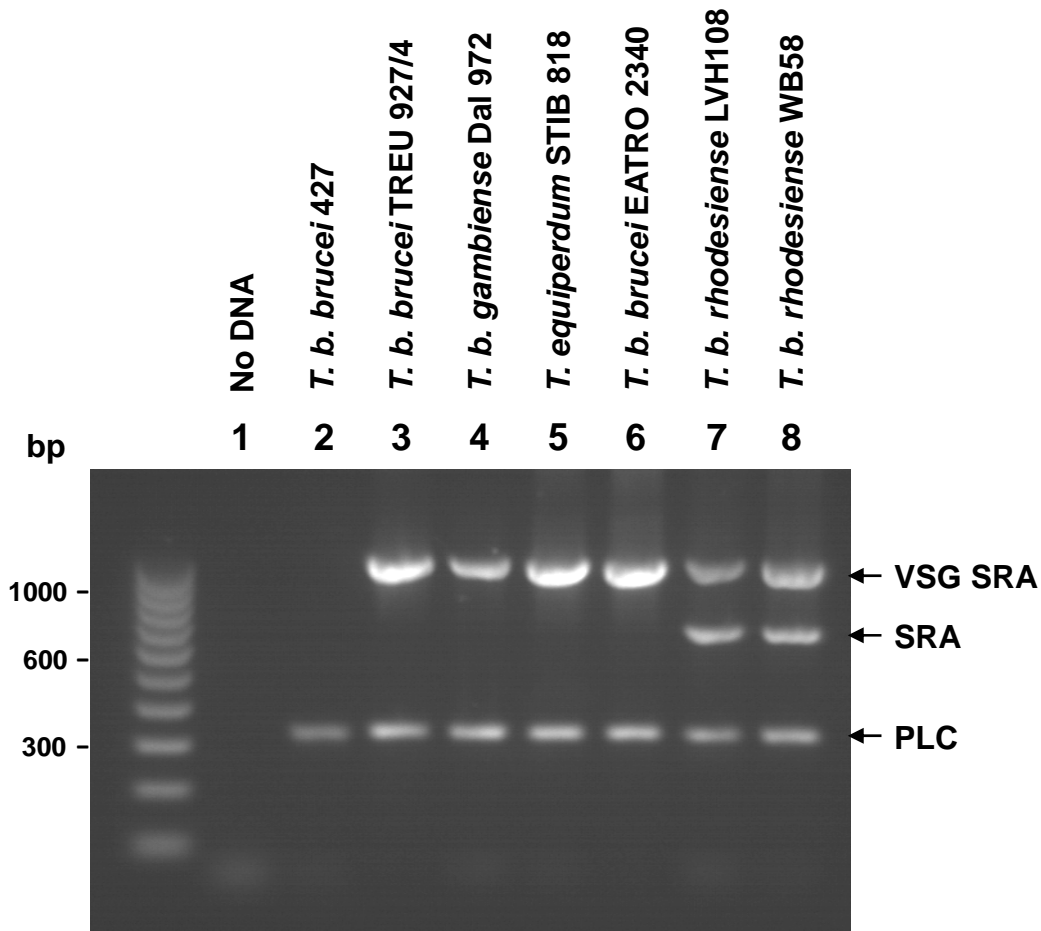

Supplement: 1471-2164-9-385-S1.pdf [file 1471-2164-9-385-S1.pdf]
