# Supplementary material for: Isolation and analysis of the genetic diversity of repertoires of VSG expression site containing telomeres from Trypanosoma brucei gambiense, T. b. brucei and T. equiperdum
Source: PubMed Central journal article supplement (PMC2533676; doi:10.1186/1471-2164-9-385), 2008-08-12
Supplement: 1471-2164-9-385-S2.pdf [file 1471-2164-9-385-S2.pdf]

**BES promoter type**

100 110 120 130 140 150 160 170 180 190

1 GCTTTATCCCGTGGCTCCTTCGTCCATTGAGGTTTCTCTCTGGGGCAGGCTGAGCGTATTTTAGAGGGCTGGTGTGTTGTTTTCATGCGAGGTGA- GGG

2 GCTTTATCCCGTGGCTCCTTCGTCCATTGAGGTTTCTCTCTGGGGCAGGCTGAGCGTATTTTAGAGGCCTGGTGTGTTGCTTTGCAGGCGAGGTGAAGGG

3 GCTTTATCCCGTGGCTCCTTCGTCCATTGAGGTTTCTCTCTGGGGCAGGCTGAGCGTATTTTAGAGGCCTGGTGTGTTGCTTTGCAGGCGAGGTGAAGGG

4 GCTTTATCCCGTGGCTCCTTCGTCCATTGAGGTTTCTCTCTGGGGCAGGCTGAGCGTATTTTAGAGGCCTGGTGTGTTGCTTTGCAGGCGAGGTGAAGGG

5 GCTTTATCCCGTGGCTCCTTCGTCCATTGAGGTTTCTCTCAGGGGCAGGCTGAGCGTATTTTAGAGGGCTGGTGTGTTGCTTTGCAGGCGAGGTGAAGGG

6 GCTTTATCCCGTGGCTCCTTCGTCCATTGAGGTTTCTCTCTGGGGCAGGCTGAGCGTATTTTAGAGGGCTGGTGTGTTGCTTTGCAGGCGAGGTGAAGGG

7 GCTTTATCCCGTGGCTCCTTCGTCCATTGAGGTTTCTCTCTGGGGCAGGCTGAGCGTATTTTAGAGGGCTGGTGTGTTGCTTTGCAGGCGAGGTGAAGGG

8 GCTTTATCCCGTGGCTCCTTCGTCCATTGAGGTTTCTCTCTGGGGCAGGCTGAGCGTATTTTAGAGGCCTGGTGTGTTGCTTTGCAGGCGAGGTGAAGGG

9 GCTTTATCCCGTGGCTCCTTCGTCCATTGAGGTTTCTCTCTGGGGCAGGCTGAGCGTATTTTAGAGGCCTGGTGTGTTGCTTTGCAGGCGAGGTGAAGGG

10 GCTTTATCCCGTGGCTCCTTCGTCCATTGAGGTTTCTCTCTGGGGCAGGCTGAGCGTATTTTAGAGGCCTGGTGTGTTGCTTTGCAGGCGAGGTGAAGGG

11 GCTTTATCCCGTGGCTCCTTCGTCCATTGAGGTTTCTCTCTGGGGCAGGCTGGCGTATTTTAGAGGGCTGGTGTGTTGCTTTGCAGGCGAGGTGAAGGG

**T. b. gambiense**

**T. b. brucei**

1 TTTATCCCGTGCACTACTGCTCCATTGAGGTTTCTCTCTGGGGCAGGCTGAGCGTATTTTAGAGGGCTGGTGTGTTGCTTTGCATGCGAAGTGAAGCGGC

2 TTTATCCCGTGGTTCCTTTGTCCATTGAGGTTTCTCTCTGGGACGGGCTGAGCGTATTTTAGAGGGCTGGTGTGTTGTTTTCATGCGAAGAGCAGGGG-

3 TTTATCCCGTGGCTCCTTCGTCCATTGAGGTTTCTCTCTGGGGCAGGCTGAGCGTATTTTAGAGGGCTGGTGTGTTGCTTTGCATGCGAAGTGAAGCGGC

4 TTTATCCCGTGGCTCCTTCGTCCATTGAGGTTTCTCTCTGGGACGGGCTGAGCGTATTTTAGAGGGCTGGTGTGTTGTTTTTCATGCGACGGGAAGGGG-

5 TTTATCCCGTGGCTCCTTCGTCCATTGAGGTTTCTCTCTGGGGCAGGCTTAGCGTATTTTAGAGGGCTGGTGTGTTGCTTTGCATGCGAGGTGAAGGGGC

6 TTTATCCCGTGGCTCCTTCGTCCATTGAGGTTTCTCTCTGGGGCAGGCTGAGCGTATTTAAGGGGGCTGGTGTGTTATTTTTTCATGCGACGGGAAGGGG-

7 TTTATCCCGTGGCTCCTTCGTCCATTGAGGTTTCTCTCTGGGGCAGGCTGAGCGTATTTTAGAGGGCTGGTGTGTTGTTTTTCATGCGACGGGAAGGGGT

8 TTTATCCCGTGGCTCCTTCGTCCATTGAGGTTTCTCTCTGGGGCAGGCTGAGCGTATTTTAGAGGGCTGGTGTGTTGTTTTTCATGCGACGGGAAGGGGT

9 TTTATCCCGTGGCTCCTTCGTCCATTGAGGTTTCTCTCTGGGGCAGGCTGAGCGTATTTTAGAGGGCTGGTGTGTTGTTTTTCATGCGACGGGAAGGGG-

10 TTTATCCCGTGGCTCCTTCGTCCATTGAGGTTTCTCTCTGGGGCAGGCTGAGCGTATTTTAGAGGGCTGGTGTGTTGCTTTGCATGCGAAGTGAAGCAGC

11 TTTATCCCGTGGCTCCTTCGTCCATTGAGGTTTCTCTCTGGGGCAGGCTGAGCGTATTTTAGAGGGCTGGTGTGTTGCTTTGCATGCGAAGTGAAGCGGT

12 TTTATCCCGTGGCTCCTTCGTCCATTGAGGTTTCTCTCTGGGGCAGGCTGAGCGTATTTTAGAGGGCTGGTGTGTTGATTTTTTCATGCGAAGTGAAGCGGC

13 TTTATCCCGTGGCTCCTTCGTCCATTGAGGTTTCTCTCTGGGGCAGGCTGAGCGTATTTTAGAGGGCTGGTGTGTTGCTTTGCAGGCGAGGTGAAGGGGC

14 TTTATCCCGTGGCTCCTTCGTCCATTGAGGTTTCTCTCTGGGGCAGGCTGAGCGTATTTTAGAGGGCTGGTGTGTTGCTTTGCATGCGAAGTGAAGCGGC

15 TTTATCCCGTGGCTCCTTCGTCCATTGAGGTTTCTCTCTGGGGCAGGCTGAGCGTATTTTAGAGGGCTGGTGTGTTGCTTTGCATGCGAAGTGAAGGGGC

16 TTTATCCCGTGGCTCCTTCGTCCATTGAGGTTTCTCTCTGGGGCAGGCTGAGCGTATTTTAGAGGGCTGGTGTGTTGCTTTGCATGCGAAGTGAAGCGGC

17 TTTATCCCGTGGCTCCTTCGTCCATTGAGGTTTCTCTCTGGGGCAGGCTGAGCGTATTTTAGAGGGCTGGTGTGTTGCTTTGCAGGCGAGGTGAAGGGGC

18 TTTATCCCGTGGTTCCTTTGTCCATTGAGGTTTCTCTCTGGGACGGGCTGAGCGTATTTTAGAGGGCTGGTGTGTTGTTTTTCATGCGAAGAGCAGGGG-

**T. equiperdum**

1 GCTTTATCCCGTGGCTCCTTCGTCCATTGAGGTTTCTCTCTGGGGCAGGCTGAGCGTATTTTAGAGGGCTGGTGTGTTGCTTTGCATGCGAGGTGAAGGG

2 GCTTTATCCCGTGGCTCCTTTGTCCATTGAGGTTTCTCTCTGGGACGGGCTGAGCGTATTTTAGAGGGCTGGTGTGTTGTTTTGCATGCGAAGAGCAGGG

3 GCTTTATCCCGTGGCTCCTTTGTCCATTGAGGTTTCTCTCTGGGACGGGCTGAGCGTATTTTAGAGGGCTGGTGTGTTGTTTTGCATGCGAGGTGAAGGG

4 GCTTTATCCCGTGGTTCCTTTGTCCATTGAGGTTTCTCTCTGGGACGGGCTGAGCGTATTTTAGAGGGCTGGTGTGTTGTTTTGCATGCGAAGAGCAGGG

5 GCTTCATCCCGTGGCTCCTTCGTCCATTGAGGTTTCTCTCTGGGACGGGCTGAGCGTATTTTAGAGGGCTGGTGTGTTGTTTTGCATGCGAAGAGCAGGG

6 GCTTTATCCCGTGGCTCCTTCGTCCATTGAGGTTTCTCTCTGGGGCAGGCTGAGCGTATTTTAGAGGGCTGGTGTGTTGCTTTGCATGCGAAGTGAAGCG

7 GCTTTATCCCGTGGCTCCTTCGTCCATTGAGGTTTCTCTCTGGGGCAGGCTGAGCGTATTTTAGAGGGCTGGTGTGTTGCTTTGCATGCGAGGTGAAGGG

8 GCTTTATCCCGTGGCTCCTTCGTCCATTGAGGTTTCTCTCTGGGGCAGGCTGAGCGTATTTTAGAGGGCTGGTGTGTTGCTTTGCATGCGAGGTGAAGGG

9 GCTTTATCCCGTGGCTCCTTCGTCCATTGAGGTTTCTCTCTGGGGCAGGCTGAGCGTATTTTAGAGGGCTGGTGTGTTGCTTTGCATGCGAAGTGAAGCG

10 GCTTTATCCCGTGGCTCCTTCGTCCATTGAGGTTTCTCTCTGGGGCAGGCTTAGCGTATTTTAGAGGGCTGGTGTGTTGCTTTGCATGCGAGGTGAAGGG

11 GCTTTATCCCGTGGCTCCTTCGTCCATTGAGGTTTCTCTCTGGGGCAGGCTGAGCGTATTTTAGAGGGCTGGTGTGTTGCTTTGCATGCGAAGTGAAGCG



**BES promoter type**

|    | 300       | 310              | 320                 | 330     | 340            | 350     | 360     | 370            | 380 | 390     |
|----|-----------|------------------|---------------------|---------|----------------|---------|---------|----------------|-----|---------|
| 1  | ACATCGTGC | CGCAGGATGGCGAAGG | TTTGAAGCGTGTAGAGAGC | TTGTGTA | AATGGCCCAAACCG | TGGGGG  | --GAG-- | GAATAACGCAGAGT | GC  | TGAGTTG |
| 2  | ACATCGTGT | GCGAGGATGGCGAAGG | TTTGAAGCGTGTAGAGAGC | TTGTGTA | AATGGCCCAAACCG | CGTGTGT | TGGGGG  | GAATAACGCAGAGT | GC  | TGAGTTG |
| 3  | ACATCGTGC | CGCAGGATGGCGAAGG | CTTGAAGCGTGTAGAGAGC | TTGTGTA | AATGGCCCAAACCG | TGTGGG  | -GGGGG  | GAATAACGCAGAGT | GC  | TGAGTTG |
| 4  | ACATCGTGC | CGCAGGATGGCGAAGG | CTTGAAGCGTGTAGAGAGC | TTGTGTA | AATGGCCCAAACCG | CGTGTGT | TGGGGG  | GAATAACGCAGAGT | GC  | TGAGTTG |
| 5  | ACATCGTGT | GCGAGGATGGCGAAGG | TTTGAAGCGTGTAGAGAGC | TTGTGTA | AATGGCCCAAACCG | CGTGTGT | TGGGGG  | GAATAACGCAGAGT | GC  | TGAGTTG |
| 6  | ACATCGTGT | GCGAGGATGGCGAAGG | TTTGAAGCGTGTAGAGAGC | TTGTGTA | AATGGCCCAAACCG | CGTGTGT | TGGGGG  | GAATAACGCAGAGT | GC  | TGAGTTG |
| 7  | ACATCGTGT | GCGAGGATGGCGAAGG | TTTGAAGCGTGTAGAGAGC | TTGTGTA | AATGGCCCAAACCG | CGTGTGT | TGGGGG  | GAATAACGCAGAGT | GC  | TGAGTTG |
| 8  | ACATCGTGT | GCGAGGATGGCGAAGG | TTTGAAGCGTGTAGAGAGC | TTGTGTA | AATGGCCCAAACCG | TGTGGG  | -GGGGG  | GAATAACGCAGAGT | GC  | TGAGTTG |
| 9  | ACATCGTGT | GCGAGGATGGCGAAGG | TTTGAAGCGTGTAGAGAGC | TTGTGTA | AATGGCCCAAACCG | CGTGTGT | TGGGGG  | GAATAACGCAGAGT | GC  | TGAGTTG |
| 10 | ACATCGTGT | GCGAGGATGGCGAAGG | TTTGAAGCGTGTAGAGAGC | TTGTGTA | AATGGCCCAAACCG | CGTGTGT | TGGGGG  | GAATAACGCAGAGT | GC  | TGAGTTG |
| 11 | ACATCGTGC | CGCAGGATGGCGAAGG | CTTGAAGCGTGTAGAGAGC | TTGTGTA | AATGGCCCAAACCG | TGTGGG  | -GGGGG  | GAATAACGCAGAGT | GC  | TGAGTTG |

***T. b. gambiense***

***T. b. brucei***

|    |         |                  |                     |         |                 |                |                 |               |          |         |
|----|---------|------------------|---------------------|---------|-----------------|----------------|-----------------|---------------|----------|---------|
| 1  | ATCGTGC | CGCAGGATGGCGAAGG | TTTGAAGCGTGTAGAGAGC | GTGTGTA | AATGGCCCAAACCG  | --TGAGGGGGGG   | --AAAACGCAGAGT  | GC            | TGAGTTG  |         |
| 2  | ATCGTGC | CGCAGGATGGCGAAGG | CTTGAAGCGTGTAGAGAGC | GTGTGTA | AATGGCCCAAACCG  | --TGTGGGTGGGGT | AATAACGCAGAGT   | GC            | TGAGTTG  |         |
| 3  | ATCGTGC | CGCAGGATGGCGAAGG | TTTGAAGCGTGTAGAGAGC | GTGTGTA | AATGGCCCAAACCG  | --TGGGGGGGGG   | --AATAACGCAGAGT | GC            | TGAGTTG  |         |
| 4  | ATCGTGC | CGCAGGATGGCGAAGG | TTTGAAGCGTGTAGAGAGC | GTGTGTA | AATGGCCCAAACCG  | TGTGTGT        | TGGGGG          | AATAACGCAGAGT | GC       | TGAGTTG |
| 5  | ATCGTGC | CGCAGGATGGCGAAGG | TTTGAAGCGTGTAGAGAGC | GTGTGTA | AATGGCCCAAACCG  | TGTGTGT        | TGTGGG          | AATAACGCAGAGT | GC       | TGAGTTG |
| 6  | GTCGTGC | CGCAGGATGGCGAAGG | TTTGAAGCGTGTAGAGAGC | GTGTGTA | AATGGACAGTGTGG  | ---GGGGGGGGG   | GAGTACGC        | GAGAGTAC      | GC       | TGAGTTG |
| 7  | ATCGTGC | CGCAGGATGGCGAAGG | CTTGAAGCGTGTAGAGAGC | GTGTGTA | AATGGGCCAAAGGA  | --GGAGGGGGGG   | --AGTAATGGAGAGT | GC            | TGAGTTG  |         |
| 8  | ATCGTGC | CGCAGGATGGCGAAGG | TTTGAAGCGTGTAGAGAGC | GTGTGTA | AATGGGCCAAAGGA  | --GGAGGGGGGG   | --AGTAATGGAGAGT | GC            | TGAGTTG  |         |
| 9  | ATCGTGT | GCGAGGATGGCGAAGG | TTTGAAGCGTGTAGAGAGC | TTGTGTA | AATGGCCCAAACCG  | --TGGGGGGGGG   | --AATAACGC      | CAAAGTGC      | TGAGTTG  |         |
| 10 | ATCGTGC | CGCAGGATGGCGAAGG | CTTGAAGCGTGTAGAGAGC | GTGTGTA | AATGGCCCAAACCG  | --TGTGGGGGGGG  | --AATAACGCAGAGT | GC            | TGAGTTG  |         |
| 11 | ATCGTGC | CGCAGGATGGCGAAGG | CTTGAAGCGTGTAGAGAGC | GTGTGTA | AATGGGCCAAAGGA  | --GGAGGGGGGG   | --AGTAATGGAGAGT | GC            | TGAGTTG  |         |
| 12 | ATCGTGC | CGCAGGATGGCGAAGG | TTTGAAGCGTGTAGAGAGC | GTGTGTA | AATGGGCCCAAAGGA | --GGAGGGGGGG   | --AGTAATGGAGAGT | GC            | TGAGTTG  |         |
| 13 | ATCGTGC | CGCAGGATGGCGAAGG | CTTGAAGCGTGTAGAGAGC | GTGTGTA | AATGGCCCAAACCG  | --TGTGGGTGGGGT | AATAACGCAGAGT   | GC            | TGAGTTG  |         |
| 14 | ATCGTGC | CGCAGGATGGCGAAGG | CTTGAAGCGTGTAGAGAGC | GTGTGTA | AATGGCCCAAAGGA  | --GGAGGGGGGG   | --AGTAATGGAGAGT | GC            | TGAGTTG  |         |
| 15 | ATCGTGC | CGCAGGATGGCGAAGG | TTTGAAGCGTGTAGAGAGC | TTGTGTA | AATGGCCCAAAC    | ---GGTGGGGGGG  | --AATAACGCAGAGT | GC            | TGAGTTG  |         |
| 16 | ATCGTGC | CGCAGGATGGCGAAGG | CTTGAAGCGTGTAGAGAGC | GTGTGTA | AATGGCCCAAACCG  | --TGTGGGTGGGGT | AATAACGCAGAGT   | GC            | TGAGCAGT |         |
| 17 | ATCGTGC | CGCAGGATGGCGAAGG | CTTGAAGCGTGTAGAGAGC | TTGTGTA | AATGGCCCAAACCG  | CGTGTGT        | TGGGGG          | AATAACGCAGAGT | GC       | TGAGTTG |
| 18 | ATCGTGC | CGCAGGATGGCGAAGG | CTTGAAGCGTGTAGAGAGC | GTGTGTA | AATGGCCCAAACCG  | --TGTGGGTGGGGT | AATAACGCAGAGT   | GC            | TGAGTTG  |         |

***T. equiperdum***

|    |           |                  |                     |         |                |             |                 |                |         |         |
|----|-----------|------------------|---------------------|---------|----------------|-------------|-----------------|----------------|---------|---------|
| 1  | ACATCGTGC | CGCAGGATGGCGAAGG | TTTGAAGCGTGTAGAGAGC | TTGTGTA | AATGGCCCAAACCG | TGGGGT      | TGGGGG          | GAATAACGCAGAGT | GC      | TGAGTTG |
| 2  | ACATCGTGC | CGCAGGATGGCGAAGG | CTTGAAGCGTGTAGAGAGC | TTGTGTA | AATGGCCCAAACCG | GTGGGT      | TGGGGT          | AATAACGCAGAGT  | GC      | TGAGCAG |
| 3  | ATATCGTGC | CGCAGGATGGCGAAGG | TTTGAAGCGTGTAGAGAGC | TTGTGTA | AATGGCCCAAACCG | --GGGGGGGGG | --AATAACGCAGAGT | GC             | TGAGTTG |         |
| 4  | ACATCGTGC | CGCAGGATGGCGAAGG | CTTGAAGCGTGTAGAGAGC | TTGTGTA | AATGGCCCAAACCG | GTGGGT      | TGGGGT          | AATAACGCAGAGT  | GC      | TGAGTTG |
| 5  | ACATCGTGC | CGCAGGATGGCGAAGG | CTTGAAGCGTGTAGAGAGC | TTGTGTA | AATGGCCCAAACCG | GGGGT       | TGGGGG          | GAATAACGCAGAGT | GC      | TGAGTTG |
| 6  | ACATCGTGC | CGCAGGATGGCGAAGG | CTTGAAGCATGTAGAGAGC | TTGTGTA | AATGGCCCAAACCG | GTGGGGGGG   | --AATAACGCAGAGT | GC             | TGAGCAG |         |
| 7  | ACATCGTGC | CGCAGGATGGCGAAGG | CTTGAAGCATGTAGAGAGC | TTGTGTA | AATGGCCCAAACCG | GTGGGGGGG   | --AATAACGCAGAGT | GC             | TGAGCAG |         |
| 8  | ACATCGTGC | CGCAGGATGGCGAAGG | CTTGAAGCATGTAGAGAGC | TTGTGTA | AATGGCCCAAACCG | GTGGGGGGG   | --AATAACGCAGAGT | GC             | TGAGCAG |         |
| 9  | ACATCGTGC | CGCAGGATGGCGAAGG | TTTGAAGCGTGTAGAGAGC | TTGTGTA | AATGGCCCAAACCG | GTGTGT      | TGTGGG          | GAATAACGCAGAGT | GC      | TGAGTTG |
| 10 | ACATCGTGC | CGCAGGATGGCGAAGG | TTTGAAGCGTGTAGAGAGC | TTGTGTA | AATGGCCCAAACCG | GTGTGT      | TGTGGG          | GAATAACGCAGAGT | GC      | TGAGTTG |
| 11 | ACATCGTGC | CGCAGGATGGCGAAGG | CTTGAAGCATGTAGAGAGC | TTGTGTA | AATGGCCCAAACCG | GTGGGGGGG   | --AATAACGCAGAGT | GC             | TGAGCAG |         |

**BES promoter type**

400 410 420 430 440 450 460 470 480 490

1 TTTGATTGGCAAGTGCCCGGAGGGTAGCTGGGGAGGAGGAAGCAAGACAGTAAAATCGTCGTGAGACGGTGGCTGTGCTCGGGAATCTGTACAAAAATA

2 TTT-ATTGGCAAGTGCCCGGAGGGGTGCTGGGGAGGAGGAAGCAAGACAGTAAAATCGTCGTGAGACGGTGGCTGTGCTCGGGAATCTCTACAAAAATA

3 TTT-ATTGGCAAGTGCCCGGAGGGGTGCTGGGGAGGAGGAAGCAAGACAGTAAAATCGTCGTGAGACGGTGGCTGTGCTCGGGAATCTCTACAAAAATA

4 TTT-ATTGGCAAGTGCCCGGAGGGGTGCTGGGGAGGAGGAAGCAAGACAGTAAAATCGTCGTGAGACGGTGGCTGTGCTCGGGAATCTCTACAAAAATA

5 TTT-ATTGGCAAGTGCCCGGAGGGGTGCTGGGGAGGAGGAAGCAAGACAGTAAAATCGTCGTGAGACGGTGGCTGTGCTCGGGAATCTCTACAAAAATA

6 TTT-ATTGGCAAGTGCCCGGAGGGGTGCTGGGGAGGAGGAAGCAAGACAGTAAAATCGTCGTGAGACGGTGGCTGTGCTCGGGAATCTCTACAAAAATA

7 TTT-ATTGGCAAGTGCCCGGAGGGGTGCTGGGGAGGAGGAAGCAAGACAGTAAAATCGTCGTGAGACGGTGGCTGTGCTCGGGAATCTCTACAAAAATA

8 TTTGATTGGCAAGTGCCCGGAGGGGTGCTGGGGAGGAGGAAGCAAGACAGTAAAATCGTCGTGAGACGGTGGCTGTGCTCGGGAATCTGTACAAAAATA

9 TTT-ATTGGCAAGTGCCCGGAGGGGTGCTGGGGAGGAGGAAGCAAGACAGTAAAATCGTCGTGAGACGGTGGCTGTGCTCGGGAATCTCTACAAAAATA

10 TTT-ATTGGCAAGTGCCCGGAGGGGTGCTGGGGAGGAGGAAGCAAGACAGTAAAATCGTCGTGAGACGGTGGCTGTGCTCGGGAATCTCTACAAAAATA

11 TTT-ATTGGCAAGTGCCCGGAGGGGTGCTGGGGAGGAGGAAGCAAGACAGTAAAATCGTCGTGAGACGGTGGCTGTGCTCGGGAATCTCTACAAAAATA

***T. b. brucei***

1 TT-ATTGGCAAGTGCCCGGAGGGATGCTGAGCAGGAGGAAGCGAGACAGTAAAAT-TGGTGAGACGGTGGCTGCGCTCGGCAATCTGTACAAAA-TA

2 TT----GACAAGTGCCCGGAGGGGTGCTGGGGAGGAGGAAGCAAGACAGTAAAATCGTCTGAGACGGTGGCTGTGCTCGGGAATCCGTACAAAATA-TA

3 TTGATTGGCAAGTGCCCGGAGGGATGCTGAGCAGGAGGAAGCGAGACAGTAAAAT-TGGTGAGACGGTGGCTGCGCTCGGCAATCTGTACAAAA-TA

4 TTGATTAGCATGTGCCCGGAGGGGTGCTGAGCAGGAGGAAGCAAGACAGTAAAATCGTCTGAGACTGTGGCTGTGCTCGGGAATCCGTACAAAATA-TA

5 TTGATTGGCAGGTGCCCGGAGGGGTGCTGAGCAGGAGGAAGCAAGACAGTAAAATCGTCTGAGACGGTGGCTGCACTCGGAATCCGTACAAAATA-TA

6 TTGATTGGCAAGTGCCCGGAGGGATGCTGAGCAGGAGGAAGGAGACAGTAAAATCGTCTGAGACGGTGGCTGCACTCGGAATCCGTACAAAATA-TA

7 TTGATTGGCAAGTGCCCGGAGGGGTGCTGAGCAGGAGGAAGCGAGACAGTAAAAT-TGGTGAGACGGTGGCTGCACTCGGAATCCGTACAAAATA

8 TTGATTGGCAAGTGCCCGGAGGGGTGCTGAGCAGGAGGAAGCGAGACAGTAAAAT-TGGTGAGACGGTGGCTGCACTCGGAATCCGTACAAAATA

9 TT-ATTGGCAAGTGCCCGGAGGGGTCTGGGGAGGAGGAAGCAAGACAGTAAAATCGTCTGAGACGGTGGCTGTGCTCGGGAATCTGTACAAAATA-TA

10 TTGATTGGCAAGTGCCCGGAGGGGTGCTGGGGAGGAGGAAGCAAGACAGTAAAATCGTCTGAGACGGTGGCTGTGCTCGGGAATCTGTACAAAATA-TA

11 TTGATTGGCAAGTGCCCGGAGGGGTGCTGAGCAGGAGGAAGCGAGACAGTAAAAT-TGGTGAGACGGTGGCTGCACTCGGAATCCGTACAAAATA

12 TTGATTGGCAAGTGCCCGGAGGGGTGCTGAGCAGGAGGAAGCGAGACAGTAAAAT-TGGTGAGACGGTGGCTGCACTCGGAATCCGTACAAAATA

13 TT----GACAAGTGCCCGGAGGGGTGCTGGGGAGGAGGAAGCAAGACAGTAAAATCGTCTGAGACGGTGGCTGTGCTCGGGAATCCGTACAAAATA-TA

14 TTGATTGGCAAGTGCCCGGAGGGGTGCTGAGCAGGAGGAAGCGAGACAGTAAAAT-TGGTGAGACGGTGGCTGCACTCGGAATCCGTACAAAATA

15 TTGATTGGCAAGTGCCCGGAGGGATGCTGAGCAGGAGGAAGCGAGATAGTAAAAT-TGGTGAGACGGTGGCTGCACTCGGAATCCGTACAAAATA

16 TT-ATTGGCAAGTGCCCGGAGGGGTGCTGGGGAGGAGGAAGCAAGAAAGTAAAATCGTCTGAGACGGTGGCTGTGCTCGGGAATCCGTACAAAATA-TA

17 TT-ATTGGCAAGTGCCCGGAGGGGTGCTGGGGAGGAGGAAGCAAGACAGTAAAATCGTCTGAGACGGTGGCTGTGATCGGGAATCTCTACAAAATA-TA

18 TT----GACAAGTGCCCGGAGGGGTGCTGGGGAGGAGGAAGCAAGACAGTAAAATCGTCTGAGACGGTGGCTGTGCTCGGGAATCCGTACAAAATA-TA

***T. equiperdum***

1 TTTGATTGGCAAGTGCCCGGAGGGGTGCTGAGCAGGAGGAAGCGAGACAGTAAAATCGTCGTGAGACGGTGGCTGCACCTCGGGAATCCGTACAAAATA

2 TTT-ATTGGAAGTGCCCGGAGGGGTGCTGGGGAGGAGGAAGCAAGAAAGTAAAATCGTCGTGAGACGGTGGCTGCACCTCGGGAATCCGTACAAAATA-T

3 TTTGATTGGCAAGTGCCCGGAGGGGTGCTGGGGAGGAGGAAGCAAGACAGTAAAATCGTCGTGAGACGGTGGCTGTGCTCGGGAATCTGTACAAAATA-T

4 TTTGA----CAAGTGCCCGGAGGGGTGCTGGGGAGGAGGAAGCAAGACAGTAAAATCGTCGTGAGACGGTGGCTGTGCTCGGGAATCCGTACAAAATA-T

5 TTTGATTGGCAAGTGCCCGGAGGGGTGCTGAGGAGGAGGAAGCAAGACAGTAAAATCGTCGTGAGACGGTGGCTGTGCTCGGGAATCCGTACAAAATA-T

6 TTT-ATTGGAAGTGCCCGGAGGGGTGCTTGGGAGGAGGAAGCAAGAAAGTAAAATCGTCGTGAGACGGTGGCTGTGCTCGGGAATCCGTACAAAATA-T

7 TTT-ATTGGAAGTGCCCGGAGGGGTGCTGGGGAGGAGGAAGCAAGAAAGTAAAATCGTCGTGAGACGGTGGCTGTGCTAGGGAATCCGTACAAAATA-T

8 TTT-ATTGGAAGTGCCCGGAGGGGTGCTGGGGAGGAGGAAGCAAGAAAGTAAAATCGTCGTGAGACGGTGGCTGTGCTAGGGAATCCGTACAAAATA-T

9 TTTGATTGGCAGGTGCCCGGAGGGGTGCTGAGGAGGAGGAAGCAAGACAGTAAAATCGTCGTGAGACGGTGGCTGCACCTCGGAATCCGTACAAAATA-T

10 TTTGATTGGCAGGTGCCCGGAGGGGTGCTGAGGAGGAGGAAGCAAGACAGTAAAATCGTCGTGAGACGGTGGCTGCACCTCGGAATCCGTACAAAATA-T

11 TTT-ATTGGAAGTGCCCGGAGGGGTGCTTGGGAGGAGGAAGCAAGAAAGTAAAATCGTCGTGAGACGGTGGCTGTGCTCGGGAATCCGTACAAAATA-T

**BES promoter type**

|                        | 500 | 510     | 520     | 530      | 540      | 550    | 560    | 570     | 580     | 590     |         |        |        |        |         |         |        |        |         |            |           |           |
|------------------------|-----|---------|---------|----------|----------|--------|--------|---------|---------|---------|---------|--------|--------|--------|---------|---------|--------|--------|---------|------------|-----------|-----------|
| <i>T. b. gambiense</i> | 1   | CTGAAA  | ATTATT  | TATGGTT  | GATATAC  | GTGGAA | ACGAC  | GAGATG  | CTTC    | AGGAGAG | CAGAAAA | TAA    | CGACA  | -AAC   | CAATAC  |         |        |        |         |            |           |           |
|                        | 2   | CTGAAA  | ATTATT  | TATGGTT  | GATATAC  | GTGGAA | CTACG  | CAGGATG | ATGCT   | GCATCG  | CCAA    | GATGCT | TC     | GGAGAG | CAGAAAA | CAACGAC | CGGATA | AAACAC |         |            |           |           |
|                        | 3   | CTGAAA  | ATTATT  | TATGGTT  | GATATAC  | GTGGAA | CTACG  | CAGGATG | ATGCT   | GCATCG  | CCAA    | GATGCT | TC     | GGAGAG | CAGAAAA | CAACGAC | CGGATA | AAACAC |         |            |           |           |
|                        | 4   | CTGAAA  | ATTATT  | TATGGTT  | GATATAC  | GTGGAA | CTACG  | CAGGATG | ATGCT   | GCATCG  | CCAA    | GATGCT | TC     | GGAGAG | CAGAAAA | CAACGAC | CGGATA | AAACAC |         |            |           |           |
|                        | 5   | CTGAAA  | ATTATT  | TATGGTT  | GATATAC  | GTGGAA | CTACG  | CAGGATG | ATGCT   | GCATCG  | CCAA    | GATGCT | TC     | GGAGAG | CAGAAAA | CAACGAC | CGGATA | AAACAC |         |            |           |           |
|                        | 6   | CTGAAA  | ATTATT  | TATGGTT  | GATATAC  | GTGGAA | CTACG  | CAGGATG | ATGCT   | GCATCG  | CCAA    | GATGCT | TC     | GGAGAG | CAGAAAA | CAACGAC | CGGATA | AAACAC |         |            |           |           |
|                        | 7   | CTGAAA  | ATTATT  | TATGGTT  | GATATAC  | GTGGAA | CTACG  | CAGGATG | ATGCT   | GCATCG  | CCAA    | GATGCT | TC     | GGAGAG | CAGAAAA | CAACGAC | CGGATA | AAACAC |         |            |           |           |
|                        | 8   | CTGAA   | TATTATT | TATGGTT  | GATATAC  | GTGGAA | CTACG  | CAGGATG | ATGCT   | GCATCG  | CCAA    | GATGCT | TC     | GGAGAG | CAGAAAA | CAACGAC | CGGATA | AAACAC |         |            |           |           |
|                        | 9   | CTGAAA  | ATTATT  | TATGGTT  | GATATAC  | GTGGAA | CTACG  | CAGGATG | ATGCT   | GCATCG  | CCAA    | GATGCT | TC     | GGAGAG | CAGAAAA | CAACGAC | CGGATA | AAACAC |         |            |           |           |
|                        | 10  | CTGAAA  | ATTATT  | TATGGTT  | GATATAC  | GTGGAA | CTACG  | CAGGATG | ATGCT   | GCATCG  | CCAA    | GATGCT | TC     | GGAGAG | CAGAAAA | CAACGAC | CGGATA | AAACAC |         |            |           |           |
|                        | 11  | CTGAAA  | ATTATT  | TATGGTT  | GATATAC  | GTGGAA | CTACG  | CAGGATG | ATGCT   | GCATCG  | CCAA    | GATGCT | TC     | GGAGAG | CAGAAAA | CAACGAC | CGGATA | AAACAC |         |            |           |           |
| <i>T. b. brucei</i>    | 1   | CTGAAA  | ATTAT   | TGATGGTT | GATATG   | CGTGG  | GAACG  | ACG     | CAGGATG | ATGCT   | GCATCG  | TAAG   | TGCTT  | TGGG   | TAA     | CGAAAA  | CAACG  | CAAA   | -CAATAC |            |           |           |
|                        | 2   | CTGAAA  | ATTAT   | TGATGGTT | GATATG   | CGTGG  | GAACG  | ACG     | CAGGATG | ATGCT   | GCATCG  | CAAG   | TGCTT  | CGGG   | GAA     | CAAG    | CAAA   | TAAC   | CG      | CAATCAACAC |           |           |
|                        | 3   | CTGAAA  | ATTAT   | TGATGGTT | GATATG   | CGTGG  | GAACG  | ACG     | CAGGATG | ATGCT   | GCATCG  | TAAG   | TGCTT  | TGGG   | TAA     | CGAAAA  | CAACG  | CAAA   | -CAATAC |            |           |           |
|                        | 4   | CTGAAA  | ATTAT   | TGATGGTT | GATATG   | CGGTGG | GAACG  | ACG     | CAGGATG | AAGCT   | GCATCG  | CAAG   | TGCTT  | CGGG   | GAA     | CAAG    | CAAA   | TAAC   | CG      | CAATCAACAC |           |           |
|                        | 5   | CTGAAA  | ATTAT   | TGATGGTT | GATATG   | CGGTGG | GAACG  | ACG     | CAGGATG | ATGCT   | TATCG   | CAAG   | TGCTT  | CGGG   | GAA     | CAAG    | CAAA   | TAAC   | CG      | CAATCAACAC |           |           |
|                        | 6   | CTGAAA  | ATTAT   | GGATGGTT | GATATAC  | GTGG   | GAACG  | AC      | CAGGATG | ATGCT   | GCATCG  | TAAG   | TGCTT  | TGGG   | GAA     | CAAG    | CAAA   | TAAC   | CG      | CAATCAACAC |           |           |
|                        | 7   | CTAAA   | GTTAT   | TGATGGTT | GATATG   | CGGTGG | GAACG  | ACG     | CAGGATG | ATGCT   | GCATCG  | TAAG   | TGCTT  | TGGG   | TAA     | CGAAAA  | CAACG  | CAAA   | -CAATAC |            |           |           |
|                        | 8   | CTAAA   | GTTAT   | TGATGGTT | GATATG   | CGGTGG | GAACG  | ACG     | CAGGATG | ATGCT   | GCATCG  | TAAG   | TGCTT  | TGGG   | TAA     | CGAAAA  | CAACG  | CAAA   | -CAATAC |            |           |           |
|                        | 9   | CTGAAA  | ATTAT   | TGATGGTT | GATATAC  | GTGG   | GAAC   | TAC     | G       | CAGGATG | ATGCT   | GCATCG | CAAG   | TGCTT  | CGGG    | GAG     | CA     | AAAA   | CAAC    | CG         | ATCAACAC  |           |
|                        | 10  | CTGAA   | TATTATT | TATGGTT  | GATATAC  | GTGG   | GAAC   | TAC     | G       | CAGGATG | ATGCT   | GCATCG | CAAG   | TGCTT  | CGGG    | GAG     | CA     | AAAA   | CAAC    | CG         | ATCAACAC  |           |
|                        | 11  | CTAAA   | GTTAT   | TGATGGTT | GATATG   | CGGTGG | GAACG  | ACG     | CAGGATG | ATGCT   | GCATCG  | TAAG   | TGCTT  | TGGG   | TAA     | CGAAAA  | CAACG  | CAAA   | -CAATAC |            |           |           |
|                        | 12  | CTAAA   | GTTAT   | TGATGGTT | GATATG   | CGTGG  | GAAC   | TAC     | G       | CAGGATG | ATGCT   | GCATCG | TAAG   | TGCTT  | TGGG    | TAA     | CGAAAA | CAACG  | CAAA    | -CAATAC    |           |           |
|                        | 13  | CTGAAA  | ATTAT   | TGATGGTT | GATATG   | CGTGG  | GAACG  | ACG     | CAGGATG | ATGCT   | GCATCG  | CAAG   | TGCTT  | CGGG   | GAA     | CAAG    | CAAA   | TAAC   | CG      | CAATCAACAC |           |           |
|                        | 14  | CTAAA   | GTTAT   | TGATGGTT | GATATG   | CGGTGG | GAACG  | ACG     | CAGGATG | ATGCT   | GCATCG  | TAAG   | TGCTT  | TGGG   | TAA     | CGAAAA  | CAACG  | CAAA   | -CAATAC |            |           |           |
|                        | 15  | ATA     | AAA     | GTTAT    | TGATGGTT | GATATG | CGGTGG | GAACG   | ACG     | CAGGATG | ATGCT   | GCATCG | TAAG   | TGCTT  | TGGG    | TAA     | CGAAAA | GAACG  | CAAA    | -CAATAC    |           |           |
|                        | 16  | CTGAAA  | ATTAT   | TGATGGTT | GATATAC  | GTGG   | GAACG  | ACG     | CAGGATG | ATGCT   | GCATCG  | CAAG   | TGCTT  | CGGG   | GAG     | CA      | AAAA   | CAACG  | CG      | ATCAACAC   |           |           |
|                        | 17  | CTGAAA  | ATTAT   | TGATGGTT | GATATAC  | GTGG   | GAAC   | TAC     | G       | CAGGATG | ATGCT   | GCATCG | CAAG   | TGCTT  | CGGG    | GAG     | CA     | AAAA   | CAACG   | CG         | ATAAAACAC |           |
|                        | 18  | CTGAAA  | ATTAT   | TGATGGTT | GATATG   | CGTGG  | GAACG  | ACG     | CAGGATG | ATGCT   | GCATCG  | CAAG   | TGCTT  | CGGG   | GAA     | CAAG    | CAAA   | TAAC   | CG      | CAATCAACAC |           |           |
| <i>T. equiperdum</i>   | 1   | ACTAAA  | A       | GTTATT   | GATG     | GTTG   | ATATG  | CGGTG   | GAACG   | ACG     | CAGGATG | ATGCT  | GCATCG | TAAG   | TGCTT   | TGGG    | GAA    | CG     | AAAA    | TAAC       | CGAC      | -AAACAATA |
|                        | 2   | ACTGAAA | A       | TTATT    | GAT      | TGTT   | GATAT  | ACGTG   | GGAACG  | ACG     | CAGGATG | ATGCT  | GCATCG | CAAG   | TGCTT   | CGGG    | GAG    | CA     | AAAA    | CAACG      | CGGAT     | CAACA     |
|                        | 3   | ACTGAAA | A       | TTATT    | TATG     | TGTT   | GATAT  | ACGTG   | GGAACG  | ACG     | CAGGATG | ATGCT  | GCATCG | CAAG   | TGCTT   | CGGG    | GAG    | CA     | AAAA    | CAACG      | CGGAT     | CAACA     |
|                        | 4   | ACTGAAA | A       | TTATT    | GATG     | GTTG   | ATATG  | CGTGG   | GAACG   | ACG     | CAGGATG | ATGCT  | GCATCG | CAAG   | TGCTT   | CGGG    | GAA    | CAAG   | CAAA    | TAAC       | CG        | CAATCAACA |
|                        | 5   | ACTGAAA | A       | TTATT    | GATG     | GTTG   | ATATG  | CGTGG   | GAACG   | ACG     | CAGGATG | ATGCT  | GCATCG | CAAG   | TGCTT   | CGGG    | GAA    | CAAG   | CAAA    | TAAC       | CG        | CAATCAACA |
|                        | 6   | ACTGAAA | A       | TTATT    | GATG     | GTTG   | ATATG  | CGTGG   | GAACG   | ACG     | CAGGATG | ATGCT  | GCATCG | CAAG   | TGCTT   | CGGG    | GAG    | CA     | AAAA    | CAACG      | CGGAT     | CAACA     |
|                        | 7   | ACTGAAA | A       | TTATT    | GATG     | GTTG   | ATATG  | CGTGG   | GAACG   | ACG     | CAGGATG | ATGCT  | GCATCG | CAAG   | TGCTT   | CGGG    | GAG    | CA     | AAAA    | CAACG      | CGGAT     | CAACA     |
|                        | 8   | ACTGAAA | A       | TTATT    | GATG     | GTTG   | ATATG  | CGTGG   | GAACG   | ACG     | CAGGATG | ATGCT  | GCATCG | CAAG   | TGCTT   | CGGG    | GAG    | CA     | AAAA    | CAACG      | CGGAT     | CAACA     |
|                        | 9   | ACTGAAA | A       | TTATT    | GATG     | GTTG   | ATATG  | CGGTG   | GAACG   | ACG     | CAGGATG | ATGCT  | TATCG  | CAAG   | TGCTT   | CGGG    | GAA    | CG     | AAAA    | TAAC       | GAA       | -AAACAATA |
|                        | 10  | ACTGAAA | A       | TTATT    | GATG     | GTTG   | ATATG  | CGGTG   | GAACG   | ACG     | CAGGATG | ATGCT  | TATCG  | CAAG   | TGCTT   | CGGG    | GAA    | CG     | AAAA    | TAAC       | GAA       | -AAACAATA |
|                        | 11  | ACTGAAA | A       | TTATT    | GATG     | GTTG   | ATATG  | CGTGG   | GAACG   | ACG     | CAGGATG | ATGCT  | GCATCG | CAAG   | TGCTT   | CGGG    | GAG    | CA     | AAAA    | CAACG      | CGGAT     | CAACA     |

**BES promoter type**

600                      610                      620                      630                      642

***T. b. gambiense***

1 CGGTGAGTTGATACTATAAAAATCACGCGGGCGTTGCTGCTTC  
 2 TGGTGAGTTGATACTATAAAAATCACGCGGGCGTTGCTGCTTC  
 3 TGGTGAGTTGATACTATAAAAATCACGCGGGCGTTGCTGCTTC  
 4 TGGTGAGTTGATACTATAAAAATCACGCGGGCGTTGCTGCTTC  
 5 TGGTGAGTTGATACTATAAAAATCACGCGGGCGTTGCTGCTTC  
 6 TGGTGAGTTGATACTATAAAAATCACGCGGGCGTTGCTGCTTC  
 7 TGGTGAGTTGATACTATAAAAATCACGCGGGCGTTGCTGCTTC  
 8 TGGTGAGTTGATACTATGAA--TCACGCGGGCGTTGCTGCTTC  
 9 TGGTGAGTTGATACTATAAAAATCACGCGGGCGTTGCTGCTTC  
 10 TGGTGAGTTGATACTATAAAAATCACGCGGGCGTTGCTGCTTC  
 11 TGGTGAGTTGATACTATAAAAATCACGCGGGCGTTGCTGCTTC

***T. b. brucei***

1 TGGTGAGTTGATACTATAAAAAT-CGCGTGGGCGTTTCTGCTTC  
 2 TGGTGAGTTGATACTATAAAAAT-CGCGTGGGCTTTGCTGCTTC  
 3 TGGTGAGTTGATACTATAAAAAT-CGCGTGGGCGTTTCTGCTTC  
 4 TGGTGAGTTGATACTA--AAAAT-CACGTGGGCGTTGCTGCTTC  
 5 TGGTGAGTTGATACTATAAAAAT-CACGCTGGGCGTTGCTGCTTC  
 6 TGGTGAGTTGATACTATAAAGGC-CACATGGACGTTGCTGTTTC  
 7 CGGTGAGTTGATACTATAAAAAT-CACGCGGGCGTTGCTGCTTC  
 8 CGGTGAGTTGATACTATAAAAAT-CACGCGGGCGTTGCTGCTTC  
 9 TGGTGAGTTGATACTATAAAAAT-CACGCGGGCGTTGCTGCTTC  
 10 TGGTGAGTTGATACTAAGAA--CACGCGGGCGTTGCTGCTTC  
 11 CGGTGAGTTGATACTATAAAAAT-CACGCGGGCGTTGCTGCTTC  
 12 CGGTGAGTTGATACTATAAAAAT-CATGCGGGCGTTGCTGCTTC  
 13 TGGTGAGTTGATACTATAAAAAT-CGCGTGGGCTTTGCTGCTTC  
 14 CGGTGAGTTGATACTATAAAAAT-CACGCGGGCGTTGCTGCTTC  
 15 TGGTGAGTTGATACTATAAAAAT-CGCGTGGGCGTTTCTGCTTC  
 16 TGGTGAGTTATTACTATAAAGGC-CACGCGGGCGTTGCTGCTTC  
 17 TGGTGAGTTGATACTATAAAAAT-CACGCGGGCGTTGCTGCTTC  
 18 TGGTGAGTTGATACTATAAAAATTGCGTGGGCTTTGCTGCTTC

***T. equiperdum***

1 CCGTGAGTTGATACTATAAAAATCACGCGGGCGTTGCTGCTTC  
 2 CTGGTGAGTTGATACTATAAAGGCCACGCGGGCGTTGCTGCTTC  
 3 CTGGTGAGTTGATACTATAAAGGCCACGCGGGCGTTGCTGCTTC  
 4 CTGGTGAGTTGATACTATAAAAATCGCGTGGGCTTTGCTGCTTC  
 5 CTGGTGAGTTGATACTATAAAAATCGCGTGGGCTTTGCTGCTTC  
 6 CTGGTGAGTTGATACTATAAAGGCCACGCGGGCGTTGCTGCTTC  
 7 CTGGTGAGTTGATACTATAAAGGCCACGCGGGCGTTGCTGCTTC  
 8 CTGGTGAGTTGATACTATAAAGGCCACGCGGGCGTTGCTGCTTC  
 9 CTGGTGAGTTGATACTATAAAAATCACGCTGGGCGTTGCTGCTTC  
 10 CTGGTGAGTTGATACTATAAAAATCACGCTGGGCGTTGCTGCTTC  
 11 CTGGTGAGTTGATACTATAAAGGCCACGCGGGCGTTGCTGCTTC
