# Supplementary material for: Isolation and analysis of the genetic diversity of repertoires of VSG expression site containing telomeres from Trypanosoma brucei gambiense, T. b. brucei and T. equiperdum
Source: PubMed Central journal article supplement (PMC2533676; doi:10.1186/1471-2164-9-385), 2008-08-12
Supplement: 1471-2164-9-385-S3.pdf [file 1471-2164-9-385-S3.pdf]

**ESAG6p type**

|                               | 100 | 110    | 120       | 130                       | 140           | 150                | 160                | 170           | 180 | 190 |
|-------------------------------|-----|--------|-----------|---------------------------|---------------|--------------------|--------------------|---------------|-----|-----|
| <b><i>T. b. gambiense</i></b> | 1   | NEFTFQ | QEELEEMRN | SALAAAAAGLAAGRLEEWIFVFAQA | AGSSQFCISV    | GKHIAAEHGNLQECFDGK | IGPETLYKIEDSRVKESA | QKSLQLHEVLSSI |     |     |
|                               | 2   | NEFTFQ | QEELEEMRN | SALAAAAAGLAAGRLEEWIFVFAQA | AGSSQFCISV    | GKHIAAEHGNLQECFDGK | IGPETLYKIEDSRVKESA | QKSLQLHEVLSSI |     |     |
|                               | 3   | NEFTFQ | QEELEEMRN | SALAAAAAGLAAGRLEEWIFVFAQA | AGSSQFCISV    | GKHIAAEHGNLQECFDGK | IGPETLYKIEDSRVKESA | QKSLQLHEVLSSI |     |     |
|                               | 4   | NEFTFQ | QEELEEMRN | SALAAAAAGLAAGRLEEWIFVFAQA | GRRSSQFCISTGK | TGPAEYNNLQECFDGT   | IGPETLYKIEDSRVKESA | KTRLLLHEVLSSI |     |     |
|                               | 5   | NEFTFQ | QEELEEMRN | SALAAAAAGLAAGRLEEWIFVFAQA | AGSSQFCISV    | GKHIAAEHGNLQECFDGK | IGPETLYKIEDSRVKESA | QKSLQLHEVLSSI |     |     |
|                               | 6   | NEFTFQ | QEELEEMRN | SALAAAAAGLAAGRLEEWIFVFAQA | AGSSQFCISV    | GKHIAAEHGNLQECFDGK | IGPETLYKIEDSRVKESA | QKSLQLHEVLSSI |     |     |
|                               | 7   | NEFTFQ | QEELEEMRN | SALAAAAAGLAAGRLEEWIFVFAQA | AGSSQFCISV    | GKHIAAEHGNLQECFDGK | IGPETLYKIEDSRVKESA | QKSLQLHEVLSSI |     |     |

|                            |    |        |           |                           |               |                     |                    |                |  |  |
|----------------------------|----|--------|-----------|---------------------------|---------------|---------------------|--------------------|----------------|--|--|
| <b><i>T. b. brucei</i></b> | 1  | NEFTFQ | QEELEEMRN | SALAAAAAGLAAGRLEEWIFVFAQA | ADRSSQFCISV   | GKTIIPPEQNNLQECFDGT | IGPETLYKIEDSRVKESA | KKSLQLHEALSSI  |  |  |
|                            | 2  | NEFTFQ | QEELEEMRN | SALAAAAAGLAAGRLEEWIFVFAQA | AGSSQFCISV    | GTNIPAEYNNLQECFDGI  | IGPETLYKIEDSRVKESA | QKSLQLHEVLSSI  |  |  |
|                            | 3  | NEFTFQ | QEELEEMRN | SALAAAAAGLAAGRLEEWIFVFAQA | AGRSSQFCISV   | GKTIIPAEYNNLQECFDGT | IGPETLYKIEDSRVKESA | KTRLLLHEVLSSI  |  |  |
|                            | 5  | NEFTFQ | QEELEEMRN | SALAAAAAGLAAGRLEEWIFVFAQA | AGSSQFCISV    | GRTGPAEYNNLQECFDGK  | IGPETLYKIEDSRVKESA | QKSLQLHEVLSSI  |  |  |
|                            | 6  | NEFTFQ | QEELEEMRN | SALAAAAAGLAAGRLEEWIFVFAQA | AGSSQFCISV    | GKNIPAEHKNLQECFDGK  | IGPETLYKIEDSRVKESA | QKSLQLHEVLSSI  |  |  |
|                            | 7  | NEFTFQ | QEELEEMRN | SALAAAAAGLAAGRLEEWIFVFAQA | AGMTSKFCISV   | GGSRPAVHDKLQECFDGT  | IGPETLYKIEDSRVKESA | QKSLQLHEALSSI  |  |  |
|                            | 8  | NEFTFQ | QEELEEMRN | SALAAAAAGLAAGRLEEWIFVFAQA | ADGSSQFCISV   | GTNIPAEHNNLQECFDGT  | IGPETLYKIEDSRVKESA | KKSLQLHEALSSI  |  |  |
|                            | 9  | NEFTFQ | QEELEEMRN | SALAAAAAGLAAGRLEEWIFVFAQA | ADGSSQFCISV   | GTNIPAEHNNLQECFDGT  | IGPETLYKIEDSRVKESA | KKSLQLHEALSSI  |  |  |
|                            | 10 | NEFTFQ | QEELEEMRN | SALAAAAAGLAAGRLEEWIFVFAQA | ADRSSQFCISV   | GKHIAAEHGNLQECFDGT  | IGPETLYKIEDSRVKESA | AKTSLQLHEVLSSI |  |  |
|                            | 11 | NEFTFQ | QEELEEMRN | SALAAAAAGLAAGRLEEWIFVFAQA | AGRSSQFCISV   | GKHIPAEHGNLQECFDGI  | IGPETLYKIEDSRVKESA | QKSLQLHEVLSSI  |  |  |
|                            | 12 | NEFTFQ | QEELEEMRN | SALAAAAAGLAAGRLEEWIFVFAQA | AGSSQFCISV    | GKHIPAEHGNLQECFDGI  | IGPETLYKIEDSRVKESA | QKSLQLHEVLSSI  |  |  |
|                            | 13 | NEFTFQ | QEELEEMRN | SALAAAAAGLAAGRLEEWIFVFAQA | ADGSSQFCISV   | GKTIIPAEYNNLQECFDGT | IGPETLYKIEDSRVKESA | KTRLLLHEVLSSI  |  |  |
|                            | 14 | NEFTFQ | QEELEEMRN | SALAAAAAGLAAGRLEEWIFVFAQA | AGRSSQFCISTGK | TGPAEYNNLQECFDGT    | IGPETLYKIEDSRVKESA | KKSLQLHEVLSSI  |  |  |
|                            | 15 | NEFTFQ | QEELEEMRN | SALAAAAAGLAAGRLEEWIFVFAQA | AGRSSQFCISV   | GKTIIPAEYNNLQECFDGT | IGPETLYKIEDSRVKESA | KKSLQLHEVLSSI  |  |  |
|                            | 16 | NEFTFQ | QEELEEMRN | SALAAAAAGLAAGRLEEWIFVFAQA | AGRSSQFCISV   | GKTIIPAEHGLQECFDGT  | IGPETLYKIEDSRVKESA | KKSLQLHEALSSI  |  |  |
|                            | 17 | NEFTFQ | QEELEEMRN | SALAAAAAGLAAGRLEEWIFVFAQA | AGRSSQFCISV   | GKHIPAEHGNLQECFDGI  | IGPETLYKIEDSRVKESA | QKSLQLHEVLSSI  |  |  |
|                            | 18 | NEFTFQ | QEELEEMRN | SALAAAAAGLAAGRLEEWIFVFAQA | AGRSSQFCISV   | GKHIPAEHGNLQECFDGI  | IGPETLYKIEDSRVKESA | QKSLQLHEVLSSI  |  |  |
|                            | 19 | NEFTFQ | QEELEEMRN | SALAAAAAGLAAGRLEEWIFVFAQA | AGRSSQFCISTGK | TGPAEYNNLQECFDGT    | IGPETLYKIEDSRVKESA | AKTSLQLHEVLSSI |  |  |
|                            | 20 | NEFTFQ | QEELEEMRN | SALAAAAAGLAAGRLEEWIFVFAQA | ADRSSQFCISV   | GKTIIPPEHNNLQECFDGT | IGPETLYKIEDSRVKESA | KKSLQLHEALSSI  |  |  |
|                            | 21 | NEFTFQ | QEELEEMRN | SALAAAAAGLAAGRLEEWIFVFAQA | AGRSSQFCISTGK | TGPAEYNNLQECFDGT    | IGPETLYKIEDSRVKESA | KTRLLLHEVLSSI  |  |  |
|                            | 22 | NEFTFQ | QEELEEMRN | SALAAAAAGLAAGRLEEWIFVFAQA | AGSSQFCISV    | GKHIAAEHGNLQECFDGK  | IGPETLYKIEDSRVKESA | QKSLQLHEVLSSI  |  |  |

|                             |   |        |           |                           |               |                    |                    |               |  |  |
|-----------------------------|---|--------|-----------|---------------------------|---------------|--------------------|--------------------|---------------|--|--|
| <b><i>T. equiperdum</i></b> | 1 | NEFTFQ | QEELEEMRN | SALAAAAAGLAAGRLEEWIFVFAQA | ADRSSQFCISTGK | TGPAEYNNLQECFDGT   | IGPETLYKIEDSRVKESA | KKSLQLHEVLSSI |  |  |
|                             | 2 | NEFTFQ | QEELEEMRN | SALAAAAAGLAAGRLEEWIFVFAQA | AGRSSQFCISTGK | TGPAEYNNLQECFDGT   | IGPETLYKIEDSRVKESA | KTRLLLHEVLSSI |  |  |
|                             | 3 | NEFTFQ | QEELEEMRN | SALAAAAAGLAAGRLEEWIFVFAQA | AGRSSQFCISTGK | TGPAEYNNLQECFDGT   | IGPETLYKIEDSRVKESA | KTRLLLHEVLSSI |  |  |
|                             | 4 | NEFTFQ | QEELEEMRN | SALAAAAAGLAAGRLEEWIFVFAQA | AGSSQFCISV    | GRTGPAEYNNLQECFDGK | IGPETLYKIEDSRVKESA | QKSLQLHEVLSSI |  |  |
|                             | 5 | NEFTFQ | QEELEEMRN | SALAAAAAGLAAGRLEEWIFVFAQA | AGSSQFCISV    | GRTGPAEYNNLQECFDGK | IGPETLYKIEDSRVKESA | QKSLQLHEVLSSI |  |  |
|                             | 6 | NEFTFQ | QEELEEMRN | SALAAAAAGLAAGRLEEWIFVFAQA | AGSSQFCISV    | GRTGPAEYNNLQECFDGK | IGPETLYKIEDSRVKESA | QKSLQLHEVLSSI |  |  |
|                             | 7 | NEFTFQ | QEELEEMRN | SALAAAAAGLAAGRLEEWIFVFAQA | GGSSQFCISV    | GTAIPPEHKNLQECFDGT | IGPETLYKIEDSRVKESA | KTRLLLHEVLSSV |  |  |

**ESAG6p type**

|                               | 200 | 210    | 220         | 230    | 240 | 250    | 260       | 270      | 280        | 290      |          |     |    |       |   |        |      |       |
|-------------------------------|-----|--------|-------------|--------|-----|--------|-----------|----------|------------|----------|----------|-----|----|-------|---|--------|------|-------|
| <b><i>T. b. gambiense</i></b> | 1   | SFGSLG | VKNIRGGNGR  | DGCNLR | TD  | TNGILN | GGSPTRHNL | TWGGGVMN | FGSYQNGSMY | VEGGEYGD | ATEYGAVR | WTE | DP | SKVSI | F | EDVIRL | FARF | QEAKN |
|                               | 2   | SFGSLG | VKNIRGGNGR  | DGCNLR | TD  | TNGILN | GGSPTRHNL | TWGGGVMN | FGSYQNGSMY | VEGGEYGD | ATEYGAVR | WTE | DP | SKVSI | F | EDVIRL | LARF | QEAKN |
|                               | 3   | SFGSLG | VKNIRGGNGR  | DGCNLR | TD  | TNGILN | GGSPTRHNL | TWGGGVMN | FGSYQNGSMY | VEGGEYGD | ATEYGAVR | WTE | DP | SKVSI | F | EDVIRL | FARF | QEAKN |
|                               | 4   | SFGSLG | GAENIRGGNGK | DGCNLR | TD  | NNGILK | GGSPTRHNL | TWGGGVMN | FGSYQNGSMY | VEGGEYGD | ATEYGAVR | WTE | DP | SKVSI | F | KDVIRL | FARF | KEAKN |
|                               | 5   | SFGSLG | VKNIRGGNGR  | DGCNLR | TD  | TNGILN | GGSPTRHNL | TWGGGVMN | FGSYQNGSMY | VEGGEYGD | ATEYGAVR | WTE | DP | SKVSI | F | EDVIRL | FARF | QEAKN |
|                               | 6   | SFGSLG | VKNIRGGNGR  | DGCNLR | TD  | TNGILN | GGSPTRHNL | TWGGGVMN | FGSYQNGSMY | VEGGEYGD | ATEYGAVR | WTE | DP | SKVSI | F | EDVIRL | FARF | QEAKN |
|                               | 7   | SFGSLG | VKNIRGGNGR  | DGCNLR | TD  | TNGILN | GGSPTRHNL | TWGGGVMN | FGSYQNGSMY | VEGGEYGD | ATEYGAVR | WTE | DP | SKVSI | F | EDVIRL | FARF | QEAKN |

***T. b. brucei***

|    |           |             |         |    |         |           |          |            |          |          |      |    |       |     |        |        |       |       |
|----|-----------|-------------|---------|----|---------|-----------|----------|------------|----------|----------|------|----|-------|-----|--------|--------|-------|-------|
| 1  | SFNSLGAES | IRGGNGK     | DGCNLR  | TD | TDGILN  | GGSPTRHNL | TWGGGVMN | FGSYQNGSMY | VEGGEYGD | ATEYGAVR | WTE  | DP | SKVSI | F   | KDVIRL | FARF   | QEAKN |       |
| 2  | SFNSLGAEN | IRGGNGR     | DGCNLR  | TD | TDGVLE  | GGSVRRHNL | TWGGGVMN | FGSYQNGSMY | VEGGEYGD | ATEYGAVR | WTE  | DP | SKVSI | F   | KDVIRL | FARF   | QEAKN |       |
| 3  | SFGSLG    | VKNIRGGNGK  | DGCNLR  | TD | TDGVLE  | GGSPTRHNL | TWGGGVMN | FGSYQNGSMY | VEGGEYGD | ATEYGAVR | WTE  | DP | SKVSI | F   | KDVIRL | FARF   | QEAKN |       |
| 5  | SFSSLGAEN | IRGGNGK     | DGCNLR  | TD | NNGILK  | GGSPTRHNL | TWGGGVMN | FGSYQNGSMY | VEGGEYGD | ATPHGTVR | WTE  | DP | NK    | VSI | F      | KDVIRL | FARF  | KEAKN |
| 6  | SFSSLGAEN | IRGGNGK     | DGCNLR  | TD | NNGILK  | GGSPTRHNL | TWGGGVMN | FGSYQNGSMY | VEGGEYGD | ATPHGTVR | WTE  | DP | NK    | VSI | F      | KDVIRL | FARF  | KEAKN |
| 7  | SFGSLG    | VKNIRGGNG   | MDGCNLR | TD | TDGILAG | GGSPTRHNL | TWGGGVMN | FGSYQNGSMY | VEGGEYGD | ATEYGAVR | WTKD | PS | SKVSI | F   | KDVIRL | FARF   | QEAKN |       |
| 8  | SFSSLG    | VKNIRGGNGR  | DGCNLR  | TD | TNGILN  | GGSPTRHNL | TWGGGVMN | FGSYQNGSMY | VEGGEYGD | ATEYGAVR | WTE  | DP | SKVSI | F   | KDVIRL | FARF   | QEAKN |       |
| 9  | SFSSLG    | VKNIRGGNGR  | DGCNLR  | TD | TNGILN  | GGSPTRHNL | TWGGGVMN | FGSYQNGSMY | VEGGEYGD | ATEYGAVR | WTE  | DP | SKVSI | F   | EDVIRL | FARF   | QEAKN |       |
| 10 | SFGSLG    | VKNIRGGNGR  | DGCNLR  | TD | TDGVLE  | GGSPTRHNL | TWGGGVMN | FGSYQNGSMY | VEGGEYGD | ATEYGAVR | WTE  | DP | SKVSI | F   | KDVIRL | FARF   | QEAKN |       |
| 11 | SFNSLGAEN | IRGGNGRH    | GCNLR   | TD | TDGVLE  | GGSVRRHNL | TWGGGVMN | FGSYQNGSMY | VEGGEYGD | ATEYGAVR | WTE  | DP | SKVSI | F   | KDVIRL | FARF   | QEAKN |       |
| 12 | SFNSLGAEN | IRGGNGRH    | GCNLR   | TD | TDGVLE  | GGSVRRHNL | TWGGGVMN | FGSYQNGSMY | VEGGEYGD | ATEYGAVR | WTE  | DP | SKVSI | F   | KDVIRL | FARF   | QEAKN |       |
| 13 | SFGSLG    | GAENIRGGNGK | DGCNLR  | TD | NNGILK  | GGSPTRHNL | TWGGGVMN | FGSYQNGSMY | VEGGEYGD | ATEYGAVR | WTE  | DP | SKVSI | F   | KDVIRL | FARF   | KEAKN |       |
| 14 | SFSSLG    | VKNIRGGNGK  | DRCNLR  | TD | TDGVLE  | GGSPTRHNL | TWGGGVMN | FGSYQNGSMY | VEGGEYGD | ATEYGAVR | WTE  | DP | SKVSI | F   | KDVIRL | FARF   | QEAKN |       |
| 15 | SFGSLG    | VKNIRGGNGK  | DRCNLR  | TD | TDGVLE  | GGSPTRHNL | TWGGGVMN | FGSYQNGSMY | VEGGEYGD | ATEYGAVR | WTE  | DP | SKVSI | F   | KDVIRL | FARF   | QEAKN |       |
| 16 | SFSSLG    | VKNIRGGNGR  | DGCNLR  | TD | TNGILE  | GGSPTRHNL | TWGGGVMN | FGSYQNGSMY | VEGGEYGD | ATEYGAVR | WTE  | DP | SKVSI | F   | EDVIRL | FARF   | QEAKN |       |
| 17 | SFNSLGAEN | IRGGNGR     | DGCNLR  | TD | TDGVLE  | GGSVRRHNL | TWGGGVMN | FGSYQNGSMY | VEGGEYGD | ATEYGAVR | WTE  | DP | SKVSI | F   | KDVIRL | FARF   | QEAKN |       |
| 18 | SFNSLGAEN | IRGGNGR     | DGCNLR  | TD | TDGVLE  | GGSVRRHNL | TWGGGVMN | FGSYQNGSMY | VEGGEYGD | ATEYGAVR | WTE  | DP | SKVSI | F   | KDVIRL | FARF   | QEAKN |       |
| 19 | SFGSLG    | VKNIRGGNGR  | DGCNLR  | TD | TDGVLE  | GGSPTRHNL | TWGGGVMN | FGSYQNGSMY | VEGGEYGD | ATEYGAVR | WTE  | DP | SKVSI | F   | KDVIRL | FARF   | QEAKN |       |
| 20 | SFGSLG    | VKNIRGGNGK  | DGCNLR  | TD | TDGILN  | GGSPTRHNL | TWGGGVMN | FGSYQNGSMY | VEGGEYGD | ATEYGAVR | WTE  | DP | SKVSI | F   | KDVIRL | FARF   | QEAKN |       |
| 21 | SFGSLGAEN | IRGGNGK     | DGCNLR  | TD | NNGILK  | GGSPTRHNL | TWGGGVMN | FGSYQNGSMY | VEGGEYGD | ATEYGAVR | WTE  | DP | SKVSI | F   | KDVIRL | FARF   | QEAKN |       |
| 22 | SFGSLG    | VKNIRGGNGR  | DGCNLR  | TD | TNGILN  | GGSPTRHNL | TWGGGVMN | FGSYQNGSMY | VEGGEYGD | ATEYGAVR | WTE  | DP | SKVSI | F   | EDVIRL | FARF   | QEAKN |       |

***T. equiperdum***

|   |           |         |        |    |        |           |          |            |          |          |     |    |       |     |        |        |       |       |
|---|-----------|---------|--------|----|--------|-----------|----------|------------|----------|----------|-----|----|-------|-----|--------|--------|-------|-------|
| 1 | SFSSLGAEN | IRGGNGK | DGCNLR | TD | NNGILK | GGSPTRHNL | TWGGGVMN | FGSYQNGSMY | VEGGEYGD | ATEYGAVR | WTE | DP | SKVSI | F   | KDVIRL | FARF   | QEAKN |       |
| 2 | SFGSLGAEN | IRGGNGK | DGCNLR | TD | NNGILK | GGSPTRHNL | TWGGGVMN | FGSYQNGSMY | VEGGEYGD | ATEYGAVR | WTE | DP | SKVSI | F   | KDVIRL | FARF   | QEAKN |       |
| 3 | SFSSLGAEN | IRGGNGK | DGCNLR | TD | NNGILK | GGSPTRHNL | TWGGGVMN | FGSYQNGSMY | VEGGEYGD | ATEYGAVR | WTE | DP | SKVSI | F   | KDVIRL | FALF   | QEAKN |       |
| 4 | SFSSLGAEN | IRGGNGK | DGCNLR | TD | NNGILK | GGSPTRHNL | TWGGGVMN | FGSYQNGSMY | VEGGEYGD | ATPHGTVR | WTE | DP | NK    | VSI | F      | KDVIRL | FARF  | KEAKN |
| 5 | SFSSLGAEN | IRGGNGK | DGCNLR | TD | NNGILK | GGSPTRHNL | TWGGGVMN | FGSYQNGSMY | VEGGEYGD | ATPHGTVR | WTE | DP | NK    | VSI | F      | KDVIRL | FARF  | KEAKN |
| 6 | SFSSLGAEN | IRGGNGK | DGCNLR | TD | NNGILK | GGSPTRHNL | TWGGGVMN | FGSYQNGSMY | VEGGEYGD | ATPHGTVR | WTE | DP | NK    | VSI | F      | KDVIRL | FARF  | KEAKN |
| 7 | SFGSLGAEN | IRGGNGK | DGCNLR | TD | NNGILK | GGSPTRHNL | TWGGGVMN | FGSYQNGSMY | VEGGEYGD | ATEYGAVR | WTE | DP | SKVSI | F   | KDVIRL | FARF   | QEAKN |       |

**ESAG6p type**

300 310 320 330 340 350 360 370 380 390 402

***T. b. gambiense***

1 AVMRR IKT TVDELTKCIGQKEAELTNDQIYEEFIWETIHRLELSKRVSEQPSLGGEEETILKSNTAE PVRGPFTGAGSNTVAVHLSVSTAALCCSVLLLGVL  
 2 AVMRR IKT TVDELTKCIGQKEAELTNDQIYEEFIWETIHRLELSKRVSEQPSLGGEEETILKSNTAE PVRGPFTGAGSNTVAVHLSVSTAALCCSVLLLGVL  
 3 AVMRR IKT TVDELTKCIGQKEAELTNDQIYEEFIWETIHRLELSKRVSEQPSLGGEEETILKSNTAE SVRGPFTGAGSNTVAVHLSVSTAALCCSVLLLGVL  
 4 AVMTK IKT TVDELTKCIGQKEAELTNDQIYEEFIWETISRLELSKRVSEQPSLGGEEETIVKSNTAE PVRGPFTGAGANTVAVQSSVSTAALCCSVLLLGVL  
 5 AVMTK IKT TVDELTKCIGQKEAELTNDQIYEEFIWETIHRLELSKRVSEQPSLGGEEETILKSNTAE PVRGPFTGAGSNTVAVHLSVSTAALCCSVLLLGVL  
 6 AVMRR IKT TVDELTKCIGQKEAELTNDQIYEEFIWETIHRLELSKRVSEQPSLGGEEETILKSNTAE PVRGPFTGAGSNTVAVHLSVSTAALCCSVLLLGVL  
 7 AVVRR IKT TVDELTKCIGQKEAELTNDQIYEEFIWETIHRLELSKRVSEQPSLGGEEETILKSNTAE PVRGPFTGAGSNTVAVHLSVSTAALCCSVLLLGVL

***T. b. brucei***

1 AVMKK IKT TVDELTKCIGQKEAELTNDQIYEEFIWETINRLELSKRVSEQSAFGEEETIVKFNNTAE PVRGPFTVAGANAAIHLVSTAALCRSALLLGVL  
 2 EVMNK IKT TVDELA KCIGQKEVELTDDQIYEEFIWETIHRLELSKRVSEQLSLGGEEETILKSNTAE PVRGPFTVAGSNTVAVHLSVSTAALCFVLLLGVL  
 3 AVMKK IKT TVDELTKCIGQKEAELTNDQIYEEFIWETINRLELSKRVSEQSAFGEEETIVKFNNTAE PVRGPFTVAGANAAIHLVSTAALCRSALLLGVL  
 5 AVMTK IKT TVDELTKCIGQKEAELTNDQIYEEFIWETINRLELSKRVSEQPSLGGEEETILKSNTAE PVRGPFTGAGANTVAVQSSVSTAALCCSVLLFGVL  
 6 AVMTK IKT TVDELTKCIGQKEAELTNDQIYEEFIWETINRLELSKRVSEQPSLGGEEETILKSNTAE PVRGPFTGAGANTVAVQSSVSTAALCCSVLLFGVL  
 7 AVMNK IKT TVDELTKCIGHKEAELTDYQIYEEFIWETIHRLELSKRVSEQPSLGGEEETILKSNTAE PVRGPFTGAGADAAAIQSSVSTAALCCLALLGVM  
 8 AVMRR IKT TVDELTKCIGQKEAELTNDQIYEEFIWETINRLELSKRMSEQPTLGGEEETILKSNTAE PVRGPFTGAGANTVALHLSVSTAALCCSVLLLGVL  
 9 AVMKK IKT TVDELTKCIGQKEAELTNDQIYEEFIWETINRLELSKRMSEQSAFGEEETIVKFNNTAE PVRGPFTGAGSNTVAVHLSFSTAALCCSVLLLGVL  
 10 AVMTK IKT TVDELTKCIGQKEAELTNDQIYEEFIWETINRLELSKRVSEQSAFGEEETIVKFNNTAE PVRGPFTVAGANAAIHLVSTAALCRSALLLGVL  
 11 EVMNK IKT TVDELA KCIGQKEVELTDDQIYEEFIWETIHRLELSKRVSEQLSLGGEEETILKSNTAE PVRGPFTVAGSNAAVHLSVSTAALCFVLLLGVL  
 12 EVMNK IKT TVDELA KCIGQKEVELTDDQIYEEFIWETIHRLELSKRVSEQLSLGGEEETILKSNTAE PVRGPFTVAGSNAAVHLSVSTAALCFVLLLGVL  
 13 AVMTK IKT TVDELTKCIGQKEAELTNDQIYEEFIWETINRLELSKRVSEQPSLGGEEETILKSNTAE PVRGPFTGAGANTVAVQSSVSTAALCCSVLLLGVL  
 14 AVMKK IKT TVDELTKCIGQKEAELTNDQIYEEFIWETINRLELSKRVSEQSAFGEEETIVKFNNTAE PVRGPFTVAGANAAIHLVSTAALCRSALLLGVL  
 15 AVMKK IKT TVDELTKCIGQKEAELTNDQIYEEFIWETINRLELSKRVSEQSAFGEEETIVKFNNTAE PVRGPFTVAGANAAIHLVSTAALCRSALLLGVL  
 16 EVMNK IKT TVDELA KCIGQKEVELTDDQIYEEFIWETIHRLELSKRVSEQPSLGGEEETILKSNTAE PVRGPFTGAGSNTVAVHLSVSTAALCRSALLLGVL  
 17 EVMNK IKT TVDELA KCIGQKEVELTDDQIYEEFIWETIHRLELSKRVSEQLSLGGEEETILKSNTAE PVRGPFTVAGSNAAVHLSVSTAALCFVLLLGVL  
 18 EVMNK IKT TVDELA KCIGQKEVELTDDQIYEEFIWETIHRLELSKRVSEQLSLGGEEETILKSNTAE PVRGHFTVAGSNAAVHLSVSTAALCFVLLLGVL  
 19 AVMTK IKT TVDELTKCIGHKEAELTNDQIYEEFIWETINRLELSKRVSEQSAFGEEETIVKFNNTAE PVRGPFTVAGANAAIHLVSTAALCRSALLLGVL  
 20 AVMKK IKT TVDELTKCTGQKEAELTNDQIYEEFIWETINRLELSKRVSEQSAFGEEETILKSNTAE PVRGPFTVAGSNAAVHLSVSTAALCRSALLLGVL  
 21 AVMKK IKT TVDELTKCIGQKEAELTNDQIYEEFIWETINRLELSKRVSEQPSLGGEEETILKSNTAE PVRGPFTGAGANTVAVQSSVFTAALCCSALLLGVL  
 22 AVMRR IKT TVDELTKCIGQKEAELTNDQIYEEFIWETIHRLELSKRVSEQPSLGGEEETILKSNTAE PVRGPFTGAGSNTVAVHLSVSTAALCCLALLLGVL

***T. equiperdum***

1 AVMTK IKT TVDELTKCIGQKEAELTNDQIYEEFIWETINRLELSKRVSEQPSLGGEEETILKSNTAE PVRGPFTGAGANTVAVQSSVSTAALCCSALLLGVL  
 2 AVMTK IKT TVDELTKCIGQKEAELTNDQVYEEFIWETINRLELSKRVSEQPSLGGEEETILKSNTAE PVRGPFTGAGANTVAVQSSVSTAALCCSVLLFGVL  
 3 AVMTK IKT TVDELTKCIGQKEAELTNDQIYEEFIWETINRLELSKRVSEQPSLGGEEETILKSNTAE PVRGPFTGAGANTVAVQSSVSTAALCCSVLLLGVL  
 4 AVMTK IKT TVDELTKCIGQKEAELTNDQIYEEFIWETINRLELSKRVSEQPSLGGEEETILKSNTAE PVRGPFTGAGANTVAVQSSVSTAALCCSVLLFGVL  
 5 AVMTK IKT TVDELTKCIGQKEAELTNDQIYEEFIWETINRLELSKRVSEQPSLGGEEETILKSNTAE PVRGPFTGAGANTVAVQSSVSTAALCCSVLLFGVL  
 6 AVMTK IKT TVDELTKCIGQKEAELTNDQIYEEFIWETINRLELSKRVSEQPSLGGEEETILKSNTAE PVRGPFTGAGANTVAVQSSVSTAALCCSVLLFGVL  
 7 AVMTK IKT TVDELTKCIGQKEAELTNDQVYEEFIWETINRLELSKRVSEQPSLGGEEETILKSNTAE PVRGPFTGAGANTVAVQSSVSTAALCCSVLLFGVL
