# Supplementary material for: Isolation and analysis of the genetic diversity of repertoires of VSG expression site containing telomeres from Trypanosoma brucei gambiense, T. b. brucei and T. equiperdum
Source: PubMed Central journal article supplement (PMC2533676; doi:10.1186/1471-2164-9-385), 2008-08-12
Supplement: 1471-2164-9-385-S4.pdf [file 1471-2164-9-385-S4.pdf]

ESAG2p type

1 10 20 30 40 50 60 70 80 90

1 MRYEIVIAFGVFAAVLSPSFQSDLGSFKWSTELIDWSKVTEYIDESYKHHNAGEFESLCKIYRITQAEAPQPSFKNREKEREIMSKLEEMVREVEAAGG

2 MRYKIVFTVGLFAAVLSPSFQSDLGSFKWSTELIDWSKVTEYIDESYKHHNAGEFETLCKIYRITQAEAPQPSFENREKENEILSKLEEMVREVEAAGG

3 MRYKIVFTVGLFAAVLSPSFQSDLGSFKWSTELIDWSKVTEYIDESYKHHNAGEFETLCKIYRITQAEAPQPSFENREKENEILSKLEEMVREVEAAGG

4 MRYKIVFTVGLFAAVLSPSFQSDLGSFKWSTELIDWSKVTEYIDESYKHHNAGEFETLCKIYRITQAEAPQPSFENREKENEILSKLEEMVREVEAAGG

5 MRYKIVIAVGVFVAVLSPSFQSDLGSFKWSTELIDWSKVTEYIDESYKHHNAGEFETLCKIYRITQAEAPQPSFENREREREIMSKLEEMVREVEAAGG

6 MRYKIVIAVGVFVAVLSPSFQSDLGSFKWSTELIDWSKVTEYIDESYKHHNAGEFETLCKIYRITQAEAPQPSFKNREKEREIMSKLEEMVREVEAAGG

7 MRYKIVFTVGLFAAVLSPSFQSDLGSFKWSTELIDWSKVTEYIDESYKHHNAGEFETLCKIYRITQAEAPQPSFENREKENEILSKLEEMVREVEAAGG

8 MRYKIVFTVGLFAAVLSPSFQSDLGSFKWSTELIDWSKVTEYIDESYKHHNAGEFETLCKIYRITQAEAPQPSFENREKENEILSKLEEMVREVEAAGG

*T. b. gambiense*

1 MRCEIVIAVGVFVAVLSPS-----FQSDLGSFKWSTELIDWSKITDYIGDGKHHNAGEFETLCKIYRITQAEAPQPSFENREKENEILNKLEEMVRET

2 MRYEIVIAVGLFAAVLYSSSEEAVDDGCTRQARVTNGRPDWDITTECVSGDYMYHNTGDFDVLCKIYRITQAEAPQPSFKNREKEGEIMSKLEEMVREV

3 MRYETVFTVGLFVAVLSPS-----FQSDLGSFKWSTELIDWSKVTEYIDESYKHHNAGEFETLCKIYRITQAEAPQPSFENREKENEILNKLEEMVRET

4 MRCETVLTIGLFAVAVLSHCDGEYIDDECTRVARVTSDRADWETIRECVSGDYMYHNTVDFDVLCKIYRITQAEAPQPSFKNRDKGEIMNKLEEMVREV

5 MRYEIVIAVGVFVAVLSSSEEAVDDECTRDARVTNGTPDWDITTECVSGDYMYHNTGDFDVLCKIYRITQAEAPQPSFKNREKEGEIMSKLEEMVREV

6 MRYEIVFVVGGLFAAVLYSSSEEAVDDECTRDARVTNGTPDWDITTECVSGDYMYHNTGDFDVLCKIYRITQAEAPQPSFKNREKEGEIMSKLEEMVREV

7 MRCEIVFVVGGLFAAVLYSSSEEAVDDECTRDARVTNGTPDSDTITECVSGDYLYHNTGDFDVLCKIYRITQAEAPQPSFKNREKEGEIMSKLEEMVREV

8 MRYEIVIAVGLFAAVLYSSSEEAVHDECTREARVTNGRPDWDITTECVSGDYMYHNTGDFDVLCKIYRITQAEAPQPSFKNREKEGEIMSKLEEMVREV

9 MRYEIVIAVGLFAAVLYSSSEEAVHDECSRARVTNDTPDSDTITECVSGDYLYHNTGDFDVLCKIYRITQAEAPQPSFKNREKEREIMSKLEEMVREV

10 MRCEIVFVVGGLFAAVLSPS-----FQSDLGSFKWSTELIDWSKVTEYIDESYKHHNAGEFETLCKIYRITQAEAPQPSFKNREKEGEIMSKLEEMVRET

11 MRCEIVFVVGGLFAAVLSPS-----FQSDLGSFKWSTELIDWSKVTEYIDESYKHHNAGEFETLCKIYRITQAEAPQPSFKNREKEGEIMSKLEEMVRET

12 MRYKIVIAVGVFVAVLSPS-----FQSDLGSFKWSTELIDWSKVTEYIDESYKHHNAGEFETLCKIYRITQAEAPQPSFENREKENEILNKLEEMVRET

13 MRYEIVIAVGVFVAVLSSSEEAVHDECTREARVTNGRPDWDITTECVSGDYMYHNTGDFDVLCKIYRITQAEAPQPSFKNREKEGEIMSKLEEMVREV

14 MRYEIVFTVGLFAAVLSPS-----FQSDLRSFKWSTELIDWSKITDYIGDGKHHNAGEFETLCKIYRITQAEAPQPSFENREKEGEIMSKLEEMVREV

15 MRCEIVFVVGGLFAAVLYSSSEEAVDDECTRDARVTNGTPDSDTITECVSGDYLYHNTGDFDVLCKIYRITQAEAPQPSFKNREKEGEIMSKLEEMVREV

16 MRYETVFTVGLFAAVLSPS-----FQSDLGSFKWSTELIDWSKVTEYIDESYKHHNAGEFETLCKIYRITQAEAPQPSFENREKENEILNKLEEMVRET

17 MRYEIVIAVGLFAAVLYSSSEEAVDDECTRVARVTNGRPDWDITTECVSGDYMYHNTGDFDVLCKIYRITQAEAPQPSFKNREKEGEIMSKLEEMVREV

*T. b. brucei*

*T. equiperdum*

1 MRYKIVIAVGVFVAVLSPS-----FQSDLGSFKWSTELIDWSKVTEYIDESYKHHNAGEFETLCKIYRITQAEAPQPSFENREREREIMSKLEEMVREV

2 MRYKIVFTVGLFAAVLSPS-----FQSDLGSFKWSTELIDWSKVTEYIDESYKHHNAGEFETLCKIYRITQAEAPQPSFENREKENEIMNKLEEMVREV

3 MRYEIVIAVGLFAAVLSSSEEAVDDECLRDARVTNDTPDSDTITECVSGDYLYHNTGDFDVLCKIYRITQAEAPQPSFKNREKEGEIMSKLEEMVREV

4 MRYKIVFTVGLFAAVLSPS-----FQSDLGSFKWSTELIDWSKVTEYIDESYKHHNAGEFETLCKIYRITQAEAPQPSFENREKENEIMNKLEEMVREV

**ESAG2p type**

|                               | 100 | 110        | 120       | 130       | 140       | 150      | 160       | 170       | 180       | 190         |             |           |          |          |
|-------------------------------|-----|------------|-----------|-----------|-----------|----------|-----------|-----------|-----------|-------------|-------------|-----------|----------|----------|
| <b><i>T. b. gambiense</i></b> | 1   | TQGLSHSSNR | RTTAYQEIK | ILLEKAKKL | KEEIEVNR  | TKALNASR | SAQENMLRA | VYGD      | AVDVARNEN | KTLEEAMRGNK | SLLFNSVDN   | AGTSCGSF  | GDKSVGK' |          |
|                               | 2   | TQDLSHSSNR | RTTAYQEIK | KLFEKAKKL | KEEIEVNR  | TKALNASR | SAQENMLRA | VYGD      | AVDVARNEN | KTLEEAMRGNK | SLLFNSVDD   | AGTSCGSY  | GDKLVGK' |          |
|                               | 3   | TQDLSHSSNR | RTTAYQEIR | KLFEKAKKL | KEEIEVNR  | TKALNASR | SAQENMLRA | VYGD      | AVDVARNEN | KTLEEAMRGNK | SLLFNSVDD   | AGTSCGSY  | GDKLVGK' |          |
|                               | 4   | TQDLSHSSNR | RTTAYQEIR | KLFEKAKKL | KEEIEVNR  | TKALNASR | SAQENMLRA | VYGD      | AVDVARNEN | KTLEEAMRGNK | SLLFNSVDD   | AGTSCGSY  | GDKLVGK' |          |
|                               | 5   | TQDLSHSSNR | RTTAYQEIK | KLFEAKKL  | KEEIEVNR  | TKALNASH | SAQENMLRA | VYGD      | AVDVARNEN | KTLEEAMRGNK | SLLFNSIDN   | AGTSCGSY  | GDKSVGK' |          |
|                               | 6   | DKGS       | SKLCKR    | TTAYQEIK  | ILLEKAKKL | KEEIEVNR | TKALNASR  | SAQENMLRA | VYGD      | AVDVARNEN   | KTLEQAMRGNK | SLLFNSIDH | NMSCGSY  | GDKLVGK. |
|                               | 7   | TQDLSHSSNR | RTTAYQEIR | KLFEKAKKL | KEEIEVNR  | TKALNASR | SAQENMLRA | VYGD      | AVDVARNEN | KTLEEAMRGNK | SLLFNSVDD   | AGTSCGSY  | GDKLVGK' |          |
|                               | 8   | TQDLSHSSNR | RTTAYQEIR | KLFEKAKKL | KEEIEVNR  | TKALNASR | SAQENMLRA | VYGD      | AVDVARNEN | KTLEEAMRGNK | SLLFNSVDD   | AGTSCGSY  | GDKSVGK' |          |

***T. b. brucei***

|  |    |         |             |          |           |           |           |           |           |           |             |             |             |           |         |
|--|----|---------|-------------|----------|-----------|-----------|-----------|-----------|-----------|-----------|-------------|-------------|-------------|-----------|---------|
|  | 1  | EAVG    | AGGNKGS     | SNKSAKST | TAYQEIR   | KLFEKAKAL | KEEIEVNR  | TRSLNASR  | SAQENMLRA | VYGD      | AVDVARNEN   | KTLEEAMRGNK | SLLFNSVDN   | AGTSCGSY  |         |
|  | 2  | EAAGS   | --TQDL      | SHSSNR   | TTAYQEIR  | KLFEKAKKL | KEEIEVNR  | TKALNASH  | SAQENMLRA | VYGD      | AVDVARNEN   | KTLEEAMRGNK | SLLFNSVDH   | NMSCGSY   |         |
|  | 3  | EAVG    | --GDK       | SNKSANST | TAYQEIR   | KLFEKAKKL | KEEIEVNR  | TKALNASR  | SAQENMLRA | VYGD      | AVDVARNEN   | KTLEKAMRENK | SLLFNSVDN   | AGTSCGSY  |         |
|  | 4  | EAAAG   | --TQDL      | SHSSIRT  | TAYQEIK   | KLFEKAKKL | QIEVNR    | TKALNASR  | SAQENMLRA | VYGD      | AVDVARNEN   | KTLEEAMRGNK | ALLFNSVDH   | NMSCGSY   |         |
|  | 5  | EAAGG   | --TQDL      | SHSSNR   | P         | TAYQEIR   | KLFEKAKKL | KEEIEVNR  | TKALNASR  | SAQENMLRA | VYGD        | AVDVARNEN   | KTLEEAMRGNK | SLLFNSIDH | NMSCGSY |
|  | 6  | EAAGG   | --TQDL      | SHSSNR   | TTAYQEIK  | KLFEKAKKL | KEEIEVNR  | TKALNASR  | SAKDNMLRA | VYGD      | AVDVARNEN   | KTLEEAMRGNK | SLLFNSVDH   | NMSCGSY   |         |
|  | 7  | EAAGG   | --TQDL      | SHSSNR   | TTAYQEIK  | KLFEKAKKL | KEEIEVNR  | TKALNASR  | SAKDNMLRA | VYGD      | AVDVARNEN   | KTLEEAMRGNK | SLLFNSVDH   | NMSCGSY   |         |
|  | 8  | EAAGS   | --TQDL      | SHSSNR   | TTAYQEIR  | KLFEKAKKL | KEEIEVNR  | TKALNASH  | SAQENMLRA | VYGD      | AVDVARNEN   | KTLEEAMRGNK | SLLFNSVDH   | NMSCGSY   |         |
|  | 9  | EAAGG   | --TQDL      | SHSSNR   | P         | TAYQEIK   | KLFEKAKKL | KEEIEVNR  | TKALNASR  | SAQENMLRA | VYGD        | AVDVARNEN   | KTLEEAMRGNK | SLLFNSIDH | NMSCGSY |
|  | 10 | EAVGGGG | NKGSNKSANST | TAYQEIK  | KLFEKAKKL | KEEIEVNR  | TKALNAGR  | SAEENMLRA | VYGD      | AVDVARNEN | KTLEKAMRGNK | SLLFNSVDN   | AGTSCGSY    |           |         |
|  | 11 | EAVGGGG | NKGSNKSANST | TAYQEIK  | KLFEKAKKL | KEEIEVNR  | TKALNASR  | SAKDNMLRA | VYGD      | AVDVARNEN | KTLEEAMRGNK | SLLFNVDN    | AGTSCGSY    |           |         |
|  | 12 | EAVGGGG | NKGSNKSANST | TAYEIR   | KLFEKAKAL | KEEIEVNR  | TKALNASR  | YAKDNMLRA | VYGD      | AVDVARNEN | KTLEEAMRGNK | SLLFNSVDH   | NMSCGSY     |           |         |
|  | 13 | EAAGG   | --TQDL      | SHSSNR   | TTAYQEIK  | KLFEKAKKL | KEEIEVNR  | TKALNASR  | SAQENMLRA | VYGD      | AVDVARNEN   | KTLEEAMRGNK | SLLFNSIDN   | AGTSCGSF  |         |
|  | 14 | EAAG    | --GTQDL     | SHSSNR   | TTAYQEIR  | KLFEKAKKL | KEEIEVNR  | TKALNASR  | SAKDNMLRA | VYGD      | AVDVARNEN   | KTLEEAMRGNK | ALLFNSVDN   | AGTSCGSY  |         |
|  | 15 | EAAGG   | --TQDL      | SHSSNR   | TTAYQEIK  | KLFEKAKAL | KEEIEVNR  | TKALNASR  | SAQENMLRA | VYGD      | AVDVARNEN   | ITLEEAMRGNK | SLLFNSVDH   | NMSCGSY   |         |
|  | 16 | EAVG    | --GDK       | SNKSANST | TAYQEIR   | KLFEKAKKL | KEEIEVNR  | TKALNASR  | SAQENMLRA | VYGD      | AVDVARNEN   | KTLEQAMRGNK | SLLFNVDN    | AGTSCGSY  |         |
|  | 17 | EAAGG   | --TQDL      | SHSSNR   | P         | TAYQEIK   | KLFEKAKKM | KEEIEVNR  | TKALNASR  | SAKDNMLRA | VYGD        | AVDVARNEN   | KTLEEAMRGNK | ALLFNSVDH | NMSCGSY |

***T. equiperdum***

|  |   |           |        |          |           |          |          |           |      |           |             |           |          |    |
|--|---|-----------|--------|----------|-----------|----------|----------|-----------|------|-----------|-------------|-----------|----------|----|
|  | 1 | EAAGGTQDL | SHSSNR | TTAYQEIK | KLFEAKKL  | KEEIEVNR | TKALNASH | SAQENMLRA | VYGD | AVDVARNEN | KTLEEAMRGNK | SLLFNSIDN | AGTSCGSY | GD |
|  | 2 | EAAGGTQDL | SHSSNR | TTAYQEIK | KLFEAKKL  | KEEIEVNR | TKALNASH | SAQENMLRA | VYGD | AVDVARNEN | KTLEEAMRGNK | SLLFNSIDN | AGTSCGSY | GD |
|  | 3 | EAAGGTQDL | SHSSNR | TTAYQEIR | KLFEKAKKL | KEEIEVNR | TKALNASR | TAQENMLRA | VYGD | AVDVARNEN | KTLEEAMRGNK | SLLFNSVDH | NMSCGSY  | GD |
|  | 4 | EAAGGTQDL | SHSSNR | TTAYQEIR | KLFEKAKKL | KEEIEVNR | TKALNASR | SAQENMLRA | VYGD | AVDVARNEN | KTLEEAMRGNK | SLLFNSVDD | AGTSCGSY | GD |

ESAG2p type

200 210 220 230 240 250 260 270 280 290

1 TLINDFFLCLVGEPIVITTEEEK-----RKKNLEGDGDNNNIYNGFNCPCRDEIRRPENGNWTTMAAESCEGDSQGYCDPAKIKYNHTEAWDVISKACVYK

2 TLINDFFLCLVGEAINVTEDMR--QKKEKEEKEKEGKYSDSVYNGFNCPCRDAIRRPESGWTMAAEYCEGNSS-PCNPDNIKINYTDAWDVISKACVYK

3 TLINDFFLCLVGETINVTGEI IKEEKKKEEKEKEEGKYSDSVYNGYNCPCRDAIRRPESGWTMAAEYCEGNSS-PCNPDNIKINYTDAWDVISKACVYK

4 TLINDFFLCLVGEAINVTGEI IKEEKKKEEKEKEEGKYSDSVYNGYNCPCRDAIRRPESGWTMAAEYCEGNSS-PCNPDNIKINYTDAWDVISKACVYK

5 TLINDFFLCLVGEAINVTGEI IKEEKKKEEKEKEEGKYSDSVYNGYNCPCRDAIRRPESGWTMAAEYCEGNSS-PCYPEEDIKINYTEAWDVI SEACVYK

6 ALINDFFLCLVGEAHKVQTQS-----APDGDYNLTIIEIYNRLNCPCKDAIRRPESGWTMAAEYCEGNSS-PCNPDNIKINYTDAWDVISKACVYK

7 TLINDFFLCLVGEAINVTGEI IKEEKKKGEKEKEKEGKYSDSVYNGYNCPCRDAIRRPESGWTMAAEYCEGNSS-PCNPDNIKINYTDAWDVISKACVYK

8 TLINDFFLCLVGEAINVTEDMR--QKKEKEEKEKEGKYSDSVYNGFNCPCRDAIRRPESGWTMAAEYCEGNSS-PCYPEEDIKINYTEAWDVI SEACVYK

*T. b. gambiense*

1 GEKLVGMTLINDFFLCLVGEA INVTEDMRQ-----KKEEKEEKEEGKYSDSVYNGFNCPCRDEIRRP

2 GDKLVGKTLINDFFLCLVGEAD-----KVQTQSATDGDYKLTLEIYNRLNCPCKDAIRRP

3 GDKLVGKTLINDFFLCLVGEA INVTEDMK-----QKKEEKKKEEGKYSDSVYNGFNCPCRDGIIRRP

4 GDKLVGKTLINDFFLCLVGEA INVTGEI IKEEKKKKEEKKKE-----EKEKEEKEKEEGVLKIGPNATDGDYNLTMIEIYNRLNCPCKDAIRRP

5 GDKLVGKTLINDFFLCLVGEA HKVQTG-----QSATDGDNLTLIEIYNRLNCPCKDAIRRP

6 GDKLVGKTLINDFFLCLVGEA ISVTGEI IKEEKKKKEEKEKEVKEEEVKEEEEEKEEKKKEVEEVQSVQSATDGDYNLTIIEIYNRLNCPCKDAIRRP

7 GDKLVGKTLINDFFLCLVGEA H-----KVQTQSGTDGDYNLTIIEIYNRLNCPCKDAIRRP

8 GDKLVGKTLINDFFLCLVGEA ISVTGDMKEEKEE-----EKKEEKEKEEVEQSVQSATAGDYKLTLEIYNRLNCPCKDAIRRP

9 GDKLVGKTLINDFFLCLVGEA HKVQTG-----QSATDGDNLTLIEIYNRLNCPCKDAIRRP

10 GDKLVGKTLINDFFLCLVGEA INVTEDMGQ-----KKKEEQRRKEGKYSDSVYNGFNCPCRDAIRRP

11 GDKLVGKTLINDFFLCLVGEA INVT EEMK-----KKKEEKEGGKYSDSVYNGFNCPCRDEIRRP

12 GDKLVGKTLINDFFLCLVGEA ISVTGEI IKEEKKKKEE-----E-----EVKEEEVQSVQSATDGDYNLTMIEIYNRLNCPCKDAIRRP

13 GDKLVGKTLINDFFLCLVGEA H-----KVQTQSAADGDYKLTMIIEIYNRLNCPCKDAIRRP

14 GDKSVGKTLINDFFLCLVGEA INVTEDMRQ-----KKEEKEEKEEGKYSDSVYNGFNCPCRDAIRRP

15 GDKLVGKTLINDFFLCLVGEA H-----KVQTQSGTDGDYNLTIIEIYNRLNCPCKDAIRRP

16 KEKLVGKTLINDFFLCLVGEA INVTGEI IKE-----EKKKEEKEEKEGKYSDSVYNGYNCPCRDAIRRP

17 GDKLVGKTLINDFFLCLVGEA IDIVKKEERRKEE-----KEEEVQSVQSATAGDYNLTMIEIYNRLNCPCKDAIRRP

*T. b. brucei*

*T. equiperdum*

1 KSVGKTLINDFFLCLVGEA INVTEDMR--QKKEKEEKEKEGKYSDSVYNGFNCPCRDAIRRPESGWTMAAEYCEGNSSPCYPEEDIKINYTEAWDVI SEAE

2 KSVGKTLINDFFLCLVGEA INVTGEI IKEEKKKKEEKEKEEGKYSDSVYNGYNCPCRDAIRRPESGWTMAAEYCEGNSSPCNPDNIKINYTEAWDVI SEAE

3 KLVGKTLINDFFLCLVGEA HKVQTQS-----ATDGDNLTMIEIYNRLNCPCKDAIRRPESGWTMAAEHCDGGERICDPENVTYGHTAEAWDVI SEAE

4 KLVGKTLINDFFLCLVGEA INVTGEI IKEEKKKKEEKEKEEGKYSDSVYNGYNCPCRDAIRRPESGWTMAAEYCEGNSSPCNPDNIKINYTDAWDVI SKA

**ESAG2p type**

|                               | 300 | 310      | 320    | 330    | 340    | 350    | 360    | 370    | 380    | 390     |        |    |        |        |       |       |        |       |        |
|-------------------------------|-----|----------|--------|--------|--------|--------|--------|--------|--------|---------|--------|----|--------|--------|-------|-------|--------|-------|--------|
| <b><i>T. b. gambiense</i></b> | 1   | NIGSNVKT | LKSALA | EFDDL  | LVNLEQ | DKYQV  | KGILGY | VRTDHN | KNHACT | GHTAGFT | CVSYKH | TL | ENGGIP | PWYNHL | TNATE | QLQEM | TKYAKE | ADSHL | HELEEY |
|                               | 2   | NVASNVKT | LKS    | VLAQFN | ALVNLE | QDKYQV | KGIFGY | VKTENN | DNRTCT | GHTAGFT | CVSYSY | TL | ENGGIP | PWYNRL | SNATE | QLQEM | DKYAKE | ADSHL | HELEEY |
|                               | 3   | NVASNVKT | LKS    | VLAQFN | ALVNLE | QDKYQV | KGIFGY | VKTENN | DNRTCT | GHTAGFT | CVSYSY | TL | ENGGIP | PWYNRL | SNATE | QLQEM | DKYAKE | ADSHL | HELEEY |
|                               | 4   | NVASNVKT | LKS    | VLAQFN | ALVNLE | QDKYQV | KGIFGY | VKTENN | DNRTCT | GHTAGFT | CVSYSY | TL | ENGGIP | PWYNRL | SNATE | QLQEM | DKYAKE | ADSHL | HELEEY |
|                               | 5   | NIASNVKT | LKSALA | QFDSL  | LVNLEQ | DKYQV  | RGIFGY | VKTEHN | DNRTCT | GHTAGFT | CVSYSY | TL | ENGGIP | PWYNHL | TNATE | QLQEM | DKYAKE | ADSHL | HELEEY |
|                               | 6   | NVASNVKT | LKSALA | EFDDL  | LVNLEQ | DKYQV  | KGILGY | VKTENN | DNRTCT | GHTAGFT | CVSYSY | TL | ENGGIP | PWYNRL | SNATE | QLQEM | DMYAKE | ADSHL | HELEEY |
|                               | 7   | NVASNVKT | LKS    | VLAQFN | ALVNLE | QDKYQV | KGIFGY | VKTENN | DNRTCT | GHTAGFT | YVSYSY | TL | ENGGIP | PWYNRL | SNATE | QLQEM | DKYAKE | ADSHL | HELEEY |
|                               | 8   | NIASNVKT | LKSALA | QFDSL  | LVNLEQ | DKYQV  | RGIFGY | VKTEHN | DNRTCT | GHTAGFT | CVSYSY | TL | ENGGIP | PWYNRL | SNATE | QLQEM | DKYAKE | ADSHL | HELEEY |

***T. b. brucei***

|    |        |       |        |        |        |        |        |        |       |        |        |        |        |        |        |        |         |         |      |
|----|--------|-------|--------|--------|--------|--------|--------|--------|-------|--------|--------|--------|--------|--------|--------|--------|---------|---------|------|
| 1  | KNGSWT | MMAEY | CEGNSS | PCNPED | IKYNH  | TEAWDV | ISKACV | YKSVAS | SNVKT | LKSALA | EFDDL  | LVNLEQ | DKYQV  | RGIFGY | VKTENN | DNRTCT | GHTAGFT | CVSY    |      |
| 2  | KSGSWT | MMAEH | CDGDGR | LCDPEN | VTYGHT | EAWDV  | ISKACV | YKNVAS | SNVKT | LKSALA | QFDAL  | VNLEQ  | DEYQV  | KGVLGY | VRTDHN | KNHACT | GHTAGFT | CVSY    |      |
| 3  | KNGSWT | MMAEY | CEGNSS | PCNPED | IKYNH  | TEAWDV | ISKACV | YKNIG  | SNVKT | LKSALA | EFDDL  | LVNLEQ | DKYQV  | KGILGY | VKTENN | DNRTCT | GHTAGFT | CVSY    |      |
| 4  | KSGSWT | MMAEY | CDGDGR | LCDPEN | VTYGHT | EAWDV  | ISEACV | YKNIG  | SNVKT | LKSALA | QFDAL  | VNLEQ  | DKYQV  | KGILGY | VRTDHN | KNHACT | GHTAGFT | CVSY    |      |
| 5  | KSGSWT | MMAEH | CDGDGR | LCDPEN | VTYGHT | EAWDV  | ISEACV | YKNIG  | SNVKT | LKSALA | EFDDL  | LVNLEQ | DKYQV  | KGIFGY | VRTDHN | KNHACT | GHTAGFT | CVSY    |      |
| 6  | KSGSWT | MMAEH | CDGDGR | LCDPEN | VTYGHT | EAWDV  | ISKACV | YKNIG  | SNVKT | LKSALA | EFDDL  | LVNLEQ | DKYQV  | KGILGY | VRTDHN | KNHACT | GHTAGFT | CVSY    |      |
| 7  | KSGSWT | MMAEY | CKGGED | ICNPEN | VTYGHT | EAWDV  | ISEACV | YKNIG  | SNVKT | LKSALA | EFDDL  | LVNLEQ | DKYQV  | KGILGY | VRTDHN | KNHACT | GHTAGFT | CVSY    |      |
| 8  | KSGSWT | MMAEH | CDGDGR | LCDPEN | VTYGHT | EAWDV  | ISKACV | YKNVAS | SNVKT | LKSALA | QFDAL  | VNLEQ  | DEYQV  | KGILGY | VRTDHN | KNHACT | GHTAGFT | CVSY    |      |
| 9  | KSGSWT | MMAEH | CDGVER | ICDPEN | VTYGHT | EAWDV  | ISKACV | YKNVAS | SNVKT | LKSALA | EFDDL  | LVNLEQ | DKYQV  | KGILGY | VRTDHN | KNHACT | GHTAGFT | CVSY    |      |
| 10 | KNGSWT | MMAEY | CEGNSS | PCNPED | IKYNY  | TEAWDV | ISKACV | YKNIG  | SNVKT | LKSALA | EFDDL  | LVNLEQ | DKYQV  | KGIFGY | VKTENN | DNRTCT | GHTAGFT | CVSY    |      |
| 11 | KNGSWT | MMAEY | CEGNSS | PCNPED | IKYNY  | TEAWDV | ISKACV | YKNIG  | SNVKT | LKSALA | EFDDL  | LVNLEQ | DKYQV  | KGIFGY | VKTENN | DNRTCT | GHTAGFT | CVSY    |      |
| 12 | KSGSWT | MMAEH | CDGDGR | LCDPEN | VTYGHT | EAWDV  | ISKACV | YKNVAS | SNVKT | LKSALA | EFDDL  | LVNLEQ | DKYQV  | KGILGY | VRTDHN | KNHACT | SHTAGFT | CVSY    |      |
| 13 | KSGSWT | MMAEH | CDGDGR | LCDPEN | VTYGHT | EAWDV  | ISKACV | YKNVAS | SNVKT | LKSALA | QFDAL  | VNLEQ  | DEYQV  | KGILGY | VRTDHN | KNHACT | GHTAGFT | CVSY    |      |
| 14 | KNGSWT | MMAEY | CEGNSS | PCNPED | IKYNY  | TEAWDV | ISKACV | YKNIG  | SNVKT | LKSALA | EFDDL  | LVNLEQ | DKYQV  | KGILGY | VKTENN | DNRTCT | GHTAGFT | CVSY    |      |
| 15 | KSGSWT | MMAEY | CKGGED | ICNPEN | VTYGHT | EAWDV  | ISKACV | YKNIG  | SNVKT | LKSALA | EFDDL  | LVNLEQ | DKYQV  | KGILGY | VRTDHN | KNHACT | GHTAGFT | CVSY    |      |
| 16 | RSGSWT | MMAEY | CEGNSS | PCNPED | IKYNY  | TEAWDV | ISKACV | YKNVAS | SNVKT | LKS    | VLAQFN | ALVNLE | QDKYQV | KGIFGY | VKTENN | DNRTCT | GHTAGFT | CVSY    |      |
| 17 | KSGSWT | MMAEH | CDGDGR | MCDPEN | VTYGHT | EAWDV  | ISKACV | YKNIG  | SNVKT | LKSALA | EFDDL  | LVNLEQ | DKYQV  | KGILGY | VRS    | DHNKNH | ACT     | GHTAGFT | CVSY |

***T. equiperdum***

|   |         |       |        |        |        |        |        |        |        |         |        |    |        |        |       |       |        |       |     |
|---|---------|-------|--------|--------|--------|--------|--------|--------|--------|---------|--------|----|--------|--------|-------|-------|--------|-------|-----|
| 1 | CVYKNIA | SNVKT | LKSALA | QFDSL  | LVNLEQ | DKYQV  | RGIFGY | VKTEHN | DNRTCT | GHTAGFT | CVSYSY | TL | ENGGIP | PWYNHL | TNATE | QLQEM | DKYAKE | ADSHL | LHE |
| 2 | CVYKNIA | SNVKT | LKSALA | QFDSL  | LVNLEQ | DKYQV  | RGIFGY | VKTENN | DNRTCT | GHTAGFT | CVSYSY | TL | ENGGIP | PWYNHL | TNATE | QLQEM | DKYAKE | ADSHL | LHE |
| 3 | CVYKNIG | SNVKT | LKSALA | EFDDL  | LVNLEQ | DKYQV  | KGILGY | VRTDHN | KNHACT | GHTAGFT | CVSYSY | TL | ENGGIP | PWYNRL | SNATE | QLQEM | DKYAKE | ADSHL | LHE |
| 4 | CVYKNVA | SNVKT | LKS    | VLAQFN | ALVNLE | QDKYQV | KGIFGY | VKTENN | DNRTCT | GHTAGFT | CVSYSY | TL | ENGGIP | PWYNHL | TNATE | QLQEM | DKYAKE | ADSHL | LHE |

ESAG2p type

400 410 420 430 440 450 460 470 480 490 503

*T. b. gambiense*

1 EDEAEEIFLEAKLGGDAELWKSSQGKGYSGGDDTVVNDGLTHLNMETGGFTLLVLSLICTL  
 2 EDEAEEIFLEAKLGGDAELWKSSQGKGDGEGDDSRVDNDGLTHLNIATGGFTLLVLSLICTL  
 3 EDEAEEIFLEVKLGGDAELWKSSQGKGDGEGDDSRVDNDGLTHLNIATGGFTLLVLSLICTL  
 4 EDEAEEIFLEVKLGGDAELWKSSQGKGDGEGDDSRVDNDGLTHLNIATGGFTLLVLSLICTL  
 5 EDEAEEIFLEAKLGGDAELWKSSQGKGDGEGDDSRVDNDGLTHLNIATGGFTLLVLSLICTL  
 6 EDEAEEIFLEVKLGGDAELWKSSQGK----GDNTVVDNDGLTHLNIATGGFTLLVLSLICTL  
 7 EDEAEEIFLEVKLGGDAELWKSSQGKGYSEGDGDDSRVDNDGLTHLNIATGGFTLLVLSLICTL  
 8 EDEAEEIFLEAKLGGDAELWKSSQGKGDGEGDDARVDNDGLTHLNIATGGFTLLVLSLICTL

*T. b. brucei*

1 KHTLENGGIPWYNRLSNATEQLQEMDMYAKEADSHLHELEEYDEAEEIFLEVKLGGDELWKSSQGK----GDDARVDNDGLTHLNIATGVAMLLIISLFCCTL  
 2 KHTLENGGIPWYNRLSNATEQLQEMDMYAKEADSHIHELEEYDEAEEIFLEVKLGGDAELWKSSQGK----GDDARLDNDGLTHLNIATGVAMLLIISLICTL  
 3 NYTLENGGIPWYNHLTNATEQLQEMDMYAKEADSHIHELEEYDEAEEIFLEVKLGGDAELWKSSQGKGDGEGDNTVVDNDGLTHLNIATGVAMLLVLSLFCML  
 4 KHTLENGGIPWYNRLSNATEQLQEMDKYAKEADSHIHELEDYQHEAEEIFLEVKLGGDELWKNRGRDDVEGAGTDVNDGLTHLNIATGVAMLLIIPLFCCTL  
 5 KHTLENGGIPWYNRLSNATEQLQEMDMYAKEADSHIHELEEYDEAEEIFLEVKLGGDAELWKSSQGK----GDDARVDNDGLTHLNIATGGFTLLVLSLICTL  
 6 KHTLENGGIPWYNHLTNATEQLQEMDMYAKEADSHIHELEEYDEAEEIFLEVKLGGDAELWKSSQGK----GDDARVDNDGLTHLNIATGVAMLLIISLICTL  
 7 KHTLENGGIPWYNHLTNATEQLQEMDMYAKEADSHIHELEEYDEAEEIFLEVKLGGDAELWKSSQGK----GDNTVVDNDGLTHLNIATGVAMLLIISLICTL  
 8 KHTLENGGIPWYNRLSNATEQLQEMDMYAKEADSHIHELEEYDEAEEIFLEVKLGGDAELWKSSQGKGDGEGDDSRVDNDGLTHLNIATGVVMLLVLSLFCCTL  
 9 SYTLENGGIPWYNRLSNATEQLQEMDKYAKEADSHLHELEEYDEAEEIFLEVKLGGDAELWKSSQGK----GDNTVVDNDGLTHLNIATGGFTLLVLSLICTL  
 10 NYTLENGGIPWYNHLTNATAQLQEMDMYAKEADSHIHELEEYDEAEEIFLEVKLGGDAELWKSSQGK----GDDARVDNDGLTHLNIATGVAMLLIISLICTL  
 11 NHTLENGGIPWYNHLTNATEQLQEMDMYAKEADSHIHELEEYDEAEEIFLEAKLGGDAELWKSSQGKGYSGGDDTVVNDGLTHLNIATGVAMLLIISLICTL  
 12 KHTLENGGIPWYNHLTNATEQLQEMDMYAKEADSHIHELEEYDEAEEIFFEVKLGDAELWKSSQGK----GDDARVDNDGLTHLNIATGVAMLLIISLICTL  
 13 KHTLENGGIPWYNRLSNATEQLQEMDMYAKEADSHIHELEEYDEAEEIFLEVKLGGDAELWKSSQGK----GDNTVVDNDGLTHLNIATGVAMLLIISLICTL  
 14 NYTLENGGIPWYNHLTNATEQLQEMDMYAKEADSHIHELEEYDEAEEIFLEAKLGGDAELWKSSQGKGYSGGDDTVVNDGLTHLNIATGVAMLLIISLICTL  
 15 KHTLENGGIPWYNHLTNATEQLQEMDMYAKEADSHIHELEEYDEAEEIFLEVKLGGDAELWKSSQGK----GDDARVDNDGLTHLNIATGVAMLLIISLICTL  
 16 SYTLENGGIPWYNRLSNATEQLQEMDKYAKEADSHLHELEEYDEAEEIFLEVKLGGDAELWKSSQGKGDGEGDDSRVDNDGLTHLNIATGVAMLLIISLICTL  
 17 KHTLENGGIPWYNRLSNATEQLQEMDMYAKEADSHIHELEEYDEAEEIFLEVKLGGDAELWKSSQGK----GDDARVDNDGLTHLNIATGVVMLLVLSLFCCTL

*T. equiperdum*

1 LEEYEDEAEEIFLEAKLGGDAELWKSSQGKGDGEGDDARVDNDGLTHLNIATGGFTLLVLSLICTL  
 2 LEEYEDEAEEIFLEVKLGGDAELWKSSQGKGDGEGDDARVDNDGLTHLNIATGGFTLLVLSLICTL  
 3 LEEYEDEAEEIFLEVKLGGDAELWKSSQGK----GDNTVVDNDGLTHLNIATGGFTLLVLSLICTF  
 4 LEEYEDEAEEIFLEAKLGGDAELWKSSQGKGDGEGDDARVDNDGLTHLNIATGGFTLLVLSLICTL
