# Supplementary material for: Isolation and analysis of the genetic diversity of repertoires of VSG expression site containing telomeres from Trypanosoma brucei gambiense, T. b. brucei and T. equiperdum
Source: PubMed Central journal article supplement (PMC2533676; doi:10.1186/1471-2164-9-385), 2008-08-12
Supplement: 1471-2164-9-385-S5.pdf [file 1471-2164-9-385-S5.pdf]

ESAG5p type

1 10 20 30 40 50 60 70 80 90  
1 MSSVSSVPVLVLFNSVLTLLCCIIGSGQRSSNPFTPEALKAGGVKVAIQEAALAPLLPALADEFERFMENITIPKQKNGVSVSEETYFRNVTVGSATVK  
2 MSSVSSVPVLVLFNSVLTLLCCIIGSGQRSSNPFTPEALKAGGVKVAIQEAALAPLLPALADEFERFMESITIPKQKNGVSVSEETYFRNVTVGSATVK  
3 MSSVSSVPVLVLFNSVLTLLCCIIGSGQRSSNPFTPEALKAGGVKVAIQEAALAPLLPALADEFERFMESITIPKQKNGVSVSEETYFRNVTVGSATVK  
4 MSSVSSVPVLVLFNSVLTLLCCIIGSGQRSSNPFTPEALKAGGVKVAIQEAALAPLLPALADEFERFMESITIPKQKNGVSVSEETYFRNVTVGSATVK  
5 MSSVSSVPVLVLFNSVLTLLCCIIGSGQRSSNPFTPEALKAGGVKVAIQEAALAPLLPALADEFERFMESITIPKQKNGVSVSEETYFRNVTVGSATVK  
6 MSSVSSVPVLVLFNSVLTLLCCIIGSGQRSSNPFTPEALKAGGVKVAIQEAALAPLLPALADEFERFMESITIPKQKNGVSVSEETYFRNVTVGSATVK

---

*T. b. gambiense*

1 MSSVSSVPVLVLFNSVLTLLCCIIGSGQRSSNPFTPEALKPGGVKVAIQEAAVTPLLALADEFERFMENITIPGQKNGVSVSEETYFRNVTVGSAAKVQ  
2 -MSLVSSAPVLVLFISVVTLLCCIIGSGQRSSNPFTPEALKPGGKVAIQEAAVTPLLVLAYEFERFMENITIPKQKVRVSVSEETYFRNVTVGSATVK  
3 MSLVSSAPVLVLFIS-VVTLLCCIIGSGQRSSNPFTPEALKPGGVKVAIQEAALAPLLPALADEFERFMENITIPGQKNGVSVSEETYFRNVTVGSAAKVQ  
4 MSLVSSAPVLVLFNSVLTLLCCIIGSGQRSSNPFTPEALEAGGVKVAIQEAAVTPLLALADEFERFMENITIPKQEVNGVSVSEETYFRNVTVGSATVQ  
6 MSLVSSAPVLVLFIS-VVTLLCCIIGSGQRSSNPFTPEALKPGGVKVAIQEAALAPLLPALADEFERFMENITIPGQKNGVSVSEETYFRNVTVGSAAKVQ  
7 MSSVSSVPVLVLFNSVLTLLCCIIGSQQLSSNPFTPEALKAGGVKVAIQEAAVTPLLALADEFERFMENITIPGQKNGVSVSEETYFRNVTVGSAAKVQ  
8 MSLVSSAPVLFVLFISVLTLLCCIIGSGQRSSNPFTPEALKPGGVKVAIQEAALAPLLPALADEFERFMENITIPKQKNGVSVSEETYFRNVTVGSATVK  
9 MSSVLSVPVLVLFNSVLTLLCCIIGSGQRSSNPFTPEALKPGGKVAIQEAAVTPLLVLAYEFERFMENITIPKQKVRVSVSEETYFRNVTVGSATVK  
10 MSSVSSVPVLVLFNSVLTLLCCIIGCGQRSSNPFTPEALKAGGVKVAIQEAALAPLLPALADEFERFMENITIPKQKNGVSVSEETYFRNVTVGSATVK  
11 MSLVSSAPVLVLFIS-VVTLLCCIIGSGQRSSNPFTPEDLKPGGVKVAIQEAALAPLLPALADEFERFMENITIPGQKNGVSVSEETYFRNVTVGSAAKVQ  
12 MSLVSSAPVLVLFIS-VVTLLCCIIGSGQRSSNPFTPEDLKPGGVKVAIQEAALAPLLPALADEFERFMENITIPGQKNGVSVSEETYFRNVTVGSAAKVQ  
13 MSLVSSAPVLVLFIS-VVTLLCCIIGSGQRSSNPFTPEALKSGGVKVAIQEAALAPLLPALADEFERFMENITIPKQKNGVSVSEETYFRNVTVGSATVK  
14 MSLVSSAPVLVLFIS-VVTLLCCIIGSGQRSSNPFTPEALKPGGVKVAIQEAALAPLLPALADEFERFMENITIPKQKNGVSVSEETYFRNVTVGSAAKVQ  
15 MSLVSSAPVLVLFIS-VVTLLCCIIGSGQRSSNPFTPEALKPGGVKVAIQEAALAPLLPALADEFERFMENITIPGQKNGVSVSEETYFRNVTVGSAAKVQ  
16 MSLVSSAPVLVLFNSVLTLLCCIIGSGQRSSNPFTPEALKAGGVKVAIQEAALAPLLPALADEFERFMENITIPKQKNGVSVSEETYFRNVTVGSATVK  
17 MSSVSSVPVLVLFNSVLTLLCCIIGSGQRSSNPFTPEALKAGGVKVAIQEAALAPLLPALADEFERFMESITIPKQKNGVSVSEETYFRNVTVGSATVK

---

*T. b. brucei*

1 MSSVSSVPVLVLFNSVLTLLCCIIGSGQRSSNPFTPEALKAGGVKVAIQEAALAPLLPALADEFERFMENITIPKQKNGASVEETYFRNVTVGSATVK  
2 MSSVLSVPVLVLFNSVLTLLCCIIGSGQRSSNPFTPEALKPGGKVAIQEAAVTPLLVLAYEFERFMENITIPKQKVRVSVSEETYFRNVTVGSATVK  
3 MSLVSSAPVLVLFIS-VVTLLCCIIGSGQRSSNPFTPEALKAGGVKVAIQEAALAPLLPALADEFERFMENITIPKQKNGVSVSEETYFRNVTVGSATVK  
4 MSLVSSAPVLVLFIS-VVTLLCCIIGSGQRSSNPFTPEALKPGGKVAIQEAAVTPLLVLAYEFERFMENITIPKQKVRVSVSEETYFRNVTVGSATVK  
5 MSLVSSAPVLVLFISVLTLLCCIIGSGQRSSNPFTPEALKPGGKVAIQEAAVTPLLVLAYEFERFMENITIPKQKVRVSVSEETYFRNVTVGSATVK  
6 MSSVSSVPVLVLFNSVLTLLCCIIGSGQRSSNPFTPEALKAGGVKVAIQEAALAPLLPALADEFERFMENITIPKQKNGVSVSEETYFRNVTVGSATVK  
7 MSSVSSVPVLVLFNSVLTLLCCIIGSGQRSSNPFTPEALKAGGVKVAIQEAALAPLLPALADEFERFMENITIPKQKNGVSVSEETYFRNVTVGSATVK  
8 MSLVSSAPVLVLFIS-VVTLLCCIIGSGQRSSNPFTPEALKPGGKVAIQEAAVTPLLVLAYEFERFMENITIPKQKVRVSVSEETYFRNVTVGSATVK  
9 MSSVSSVPVLVLFISVLTLLCCIIGSGQRSSNPFTPEALKPGGVKVAIQEAAVTPLLALADEFERFMENITIPKQKNGVSVSEETYFRNVTVGSATVQ

*T. equiperdum*

ESAG5p type

100 110 120 130 140 150 160 170 180 190

*T. b. gambiense*

1 FWGSNKMVWNFCNVSATVPFTRFVYHSFWCYLYPCSGSAQAEIRNASVALWLDVSA GRGGLLDIHVGGSAIGNDDPLITLIGEGKSKVPKWLGGRVKDMY  
2 FWGLNKMVWNFCNVSATVPFTRFVYHSFWCYLYPCSGSAQAEIRNASVALWLDVSA GRGGLLDIHVGGSAIGNDDPLITLIGEGKSKVPKWLGGRVKDMY  
3 FWGSNKMVWNFCNVSATVPFTRFVYHSFWCYLYPCSGSAQAEIRNASVALWLDVSA GRGGLLDIHVGGSAIGNDDPLITLIGEGKSKVPKWLGGRVKDMY  
4 FWGSNKMVWNFCNVSANVPFTRFVYHSFWCYLYPCSGSAQAEIRNASVALWLDVSA GRGGLLDIHVGGSAIGNDDPLITLIGEGKSKVPKWLGGRVKDMY  
5 FWGSNKMVWNFCNVSATVPFTRFVYHSFWCYLYPCSGSAQAEIRNASVALWLDVSA GRGGLLDIHVGGSAIGNDDPLITLIGEGKSKVPKWLGGRVKDMY  
6 IWGSNKMVWNFCNVSATVPFTRFVYHSFWCYLYPCSGSAQAEIRNASVALWLDVSA GRGGLLDIHVGGSAIGNDDPLITLIGEGKSKVPKWLGGRVKDMY

*T. b. brucei*

1 FWGSNKMVWNFCNVSATVPFTRFVYHSFWCYLYPCSGSAQVEIRNASVALWLDVSA TRGGLLDIHVGGSAIGNDDPLITLIGEGKSKVPKWLGGRVKDMY  
2 FEENKIIILKFWNVSATVPFTRFVYHSFWCYLYPCSGSAQAEIRNGSVALWLDVSA GRGGLLDIHVGSSEIGMRDPLITLIGEGKSKMPKWLGGRVKDMY  
3 FWGSNKMVWNFCNVSATVPFTRFVYHSFWCYLYPCSGSAQAEIRNASVALWLDVSA GRGGILD IHVGGSGIGMDPLITLIGEGKSKVPKWLGGRVKDMY  
4 FWESNKMVWNFCNVSATVPFTRFVYHSFWCYLYPCSGSAQAEIRNGSVELWLDVSA GRGGLLDIHVGGSAIGNDDPLITLIGEGKSKVPKWLGGRVKDMY  
6 FWGSNKMVWNFCNVSATVPFTRFVYHSFWCYLYPCSGSAQAEIRNASVALWLDVSA GRGGILD IHVGGSGIGMDPLITLIGEGKSKVPKWLGGRVKDMY  
7 FWGSNKMVWNFCNVSATVPFTRFVYHSFWCYLYPCSGSAQAEIRNASVALWLDVSA RRGGLLDIHVGGSGIGMDPLITLIGEGKSKVPKWLGGRVKDMY  
8 FWGSNKMVWNFCNVSATVPFTRFVYHSFWCYLYPCSGSAQAEIRNASVALWLDVSA GRGGILG IHVGGSAIGNDDPLITLIGEGKSKVPKWLGGRVKDMY  
9 FEENKIIILKFWNVSATVPFTRFVYHSFWCYLYPCSGSAQAEIRNGSVALWLDVSA GRGGLLDIHVGSSEIGMRDPLITLIGEGKSKMPKWLGGRVKDMY  
10 FWGSNKMVWNFCNVSATVPFTRFVYHSFWCYLYPCSGSAQAEIRNGSVELWLDVSA GRGGLLDIHVGGSAIGNDDPLITLIGEGKSKVPKWLGGRVKDMY  
11 FWGSNKMVWNFCNVSATVPFTRFVYHSFWCYMYPCSGSAQAEIRNASVALWLDVSA RRGGLLDIHVGGSGIGMDPLITLIGEGKSKVPKWLGGRVKDVY  
12 FWGSNKMVWNFCNVSATVPFTRFVYHSFWCYMYPCSGSAQAEIRNASVALWLDVSA RRGGLLDIHVGGSGIGMDPLITLIGEGKSKVPKWLGGRVKDVY  
13 FWGSNKMVWNFCNVSATVPFTRFVYHSFWCYLYPCSGSAQAEIRNASVALWLDVSA GRGGILD IHVGGSGIGMDPLITLIGEGKSKVPKWLGGRVKDMY  
14 FWGSNKMVWNFCNVSATVPFTRFVYHSFWCYMYPCSGSAQAEIHNASVALWLDVSA RRGGLLDIHVGGSGIGMDPLITLIGEGKSKVPKWLGGRVKDVY  
15 FWGSNKMVWNFCNVSATVPFTRFVYHSFWCYLYPCSGSAQAEIRNASVALWLDVSA TRGGLLDIHVGGSAIGNDDPLITLIGEGKSKVPKWLGGRVKDMY  
16 FWGSNKMVWNFCNVSATVPFTRFVYHSFWCYLYPCSGSAQAEIRNASVALWLDVSA GRGGLLDIHVGGSAIGNDDPLITLIGEGKSKVPKWLGGRVKDMY  
17 FWGSNKMVWNFCNVSATVPFTRFVYHSFWCYLYPCSGSAQAEIRNASVALWLDVSA GRGGLLDIHVGGSAIGNDDPLITLIGEGKSKVPKWLGGRVKDMY

*T. equiperdum*

1 FWGSNKMVWNFCNVSATVPFTRFVYHSFWCYLYPCSGSAQAEIRNASVALWLDVSA GRGGLLDIHVGGSAIGNDDPLITLIGEGKSKVPKWLGGRVKDMY  
2 FEENKIIILKFWNVSATVPFTRFVYHSFWCYLYPCSGSAQAEIRNGSVALWLDVSA GRGGLLDIHVGSSEIGMRDPLITLIGEGKSKMPKWLGGRVKDMY  
3 FWGSNKMVWNFCNVSATVPFTRFVYHSFWCYLYPCSGSAQAEIRNASVALWLDVSA GRGGLLDIHVGGSAIGNDDPLITLIGEGKSKVPKWLGGRVKDMY  
4 FEENKIIILKFWNVSATVPFTRFVYHSFWCYLYPCSGSAQAEIRNGSVALWLDVSA GRGGLLDIHVGSSEIGMRDPLITLIGEGKSKMPKWLGGRVKDMY  
5 FEENKIIILKFWNVSATVPFTRFVYHSFWCYLYPCSGSAQAEIRNGSVALWLDVSA GRGGLLDIHVGSSEIGMRDPLITLIGEGKSKMPKWLGGRVKDMY  
6 FWGSNKMVWNFCNVSATVPFTRFVYHSFWCYLYPCSGSAQAEIRNASVALWLDVSA GRGGLLDIHVGGSAIGNDDPLITLIGEGKSKVPKWLGGRVKDMY  
7 FWGSNKMVWNFCNVSATVPFTRFVYHSFWCYLYPCSGSAQAEIRNASVALWLDVSA GRGGLLDIHVGGSAIGNDDPLITLIGEGKSKVPKWLGGRVKDMY  
8 FEENKIIILKFWNVSATVPFTRFVYHSFWCYLYPCSGSAQVEIRNGSVALWLDVSA GRGGLLDIHVGSSEIGMRDPLITLIGEGKSKMPKWLGGRVKDMY  
9 FWGSNKMILKFWNVSATVPFTRFVYHSFWCYLYPCSGSAQAEIRNGSVALWLDVSA GRGGLLDITVGGSAIGMDPLITLIGEGKSKMPKWLGGRVKDMY

**ESAG5p type**

200 210 220 230 240 250 260 270 280 290

1 DKDVLPLKLGHHIITAANQILAKKTKEIFHMFPVIVFNSSKIEYEQMRLELVVLADAADQLMLTEKVFSPRQPFNWPVAVVSSFTALNNMLRLMIKSGHS

2 DKDVLPLKLGHHIITAANQILANKTKEIFHMFPVIVFNSSKIEYEQMRLELVVLADATDQLMLTEKVFSPRQPFNWPVAVVSSFTALNNMLRLMIKSGHS

3 DKDVLPLKLGHHIITAANLILANKTKEIFHMFPVIVFNSSKIEYEQMRLELVVLADATDQLMLTEKVFSPRQPFNWPVAVVSSFTALNNMLRLMIKSGHS

4 DKDVLPLKLGHHIITAANQILANKTKEIFHMFPVIVFNSSKIEYEQMRLELVVLADATDQLMLTEKVFSPRQPFNWPVAVVSSFTALNNMLRLMIKSGHS

5 DKDVLPLKLGHHIITAANQILANKTKEIFHMFPVIVFNSSKIEYEQMRLELVVLADATDQLMLTEKVFSPRQPFNWPVAVVSSFTALNNMLRLMIKSGHS

6 DKDVLPLKLGHHIITAANQILANKTKEIFHMFPVIVFNSSKIEYEQMRLELVVLADATDQLMLTEKVFSPRQPFNWPVAVVSSFTALNNMLRLMIKSGHS

***T. b. gambiense***

1 DKDVLPLKLGHHIITAANQILANKTKEIFHMFPVIVFNSSKIEYEQMRLELVVLPDAADQLILTEKVFSPRHPPFNFPVAVVSSFTALNNMLRLMIKRGHS

2 DKDVLPLKLGHHIITAVNQILANKAKEIFHMFPVIVFNSSKIEYEQMRLELVVLPDAADKLMLTENVFPRQPFNFPVAVVSSFTALNNMLRLMIKSGHL

3 DKDVLPLKLGHHIITAANQILANKTKEIFHMFPVIVFNSSKIEYEQMRLELVVLADAADQLMLTEKVFSPRQPFNFPVAVVSSFTALNNMLRLMIKRGHS

4 DKDVLPLKLGHHIITAANQILANKTKEIFHMFPVIVFNSSKIEYEQMRLELVVLPDAADRLILTEKVFSPRHPPFNWVAVVSSFTALNNMLRLMIKRGHS

6 DKDVLPLKLGHHIITAANQILANKTKEIFHMFPVIVFNSSKIEYEQMRLELVVLPDAADRLMLTEKVFSPRQPFNFPVAVVSSFTALNNMLRLMIKRGHS

7 DKDVLPLKLGHHIITAANQILANKTKEIFHMFPVIVFNSSKIEYEQMRLELVVLADAADQLMLTEKVFSPRQPFNFPVAVVSSFTALNNMLRLMIKRGHS

8 DKDVLPLKLGHHIITAVNQILANKTKEIFHMFPVIVFNSSKIEYEQMRLELVVLPDAADQLMLTEKVFSPRQPFNFPVAVVSSFTALNNMLRLMIKRGHS

9 DKDVLPLKLGHHIITAVNQILANKAKEIFHMFPVIVFNSSKIEYEQMRLELVVLPDAADKLMLTENVFPRQPFNFPVAVVSSFTALNNMLRLMIKSGHL

10 DKDVLPLKLGHHIITAANQILTNKTKEIFHMFPVIVFNSSKIEYEQMRLELVVLPDAADQLMLTEKVFSPRQPFNFPVAVVSSFTALNNMLRLMIKRGHS

11 DKDVLPLKLGHHIITAVNQILANKTKEIFHMFPVIVFNSSKIEYEQMRLEMVVLPDAADQLMLTEKVFSPRQPFNFPVAVVSSFTALNNMLRLMIKRGHS

12 DKDVLPLKLGHHIITAVNQILANKTKEIFHMFPVIVFNSSKIEYEQMRLEMVVLADAADQLMLTEKVFSPRQPFNFPVAVVSSFTALNNMLRLMIKRGHS

13 DKDVLPLKLGHHIITAANQILANKTKEIFHMFPVIVFNSSKIEYEQMRLELVVLPDAADQLMLTEKVFSPRHPPFNFPVAVVSSFTALNNMLRLMIKRGHS

14 DKDVLPLKLGHHIITAVNQILANKTKEIFHMFPVIVFNSSKIEYEQMRLEMVVLPDAADQLMLTEKVFSPRQPFNFPVAVVSSFTALNNMLRLMIKRGHS

15 DKDVLPLKLGHHIITAANQILANKTKEIFHMFPVIVFNSSKIEYEQMRLELVVLPDAADQLMLTEKVFSPRHPPFNFPVAVVSSFTALNNMLRLMIKRGYS

16 DKDVLPLKLGHHIITAANQILANKTKEIFHMFPVIVFNSSKIEYEQMRLELVVLADAADQLMLTEKVFPRQPFNFPVAVVSSFTALNNMLRLMIKRGHS

17 DKDVLPLKLGHHIITGVNRILTNTKTKEIFHMFPVIVFNSSKIEYEQMRLELVVLADAADQLMLTEKVFSPRQPFNFPVAVVSSFTALNNMLRLMIKSGHS

***T. b. brucei***

1 DKDVLPLKLGHHIITGVNRILTNTKTKEIFHMFPVIVFNSSKIEYEQMRLELVVLADAADQLMLTEKVFSPRQPFNFPVAVVSSFTALNNMLRLMIKSGHS

2 DKDVLPLKLGHHIITAVNQILANKAKEIFHMFPVIVFNSSKIEYEQMRLELVVLPDAADKLMLTENVFPRQPFNFPVAVVSSFTALNNMLRLMIKSGHL

3 DKDVLPLKLGHHIITAVNEILANKAKEIFHMFPVIVFNSSKIEYEQMRLELVVLPDAADQLMLTENVFPRQPFNFPVAVVSSFTALNNMLRLMIKSGHS

4 DKDVLPLKLAHHIITAVNQILANKAKEIFHMFPVIVFNSSKIEYEQMRLELVVLPDAADKLMLTENVFPRQPFNFPVAVVSSFTALNNMLRLMIKSGHL

5 DKDVLPLKLAHHIITAVNQILANKAKEIFHMFPVIVFNSSKIEYEQMRLELVVLPDAADKLMLTENVFPRQPFNFPVAVVSSFTALNNMLRLMIKSGHL

6 DKDVLPLKLGHHIITAANQILANKTKEIFHMFPVIVFNSSKIEYEQMRLELVVLADAADQLMLTKKVFSPRQPFNFPVAVVSSFTALNNMLRLMIKSGHS

7 DKDVLPLKLGHHIITAANQILANKTKEIFHMFPVIVFNSSKIEYEQMRLELVVLPDAADKLMLTENVFPRQPFNFPVAVVSSFTALNNMLRLMIKSGHS

8 DKDVLPLKLAHHIITGVNRILTNTKTKEIFHMFPVIVFNSSKIEYEQMRLELVVLPDAADKLMLTENVFPRQPFNFPVAVVSSFTALNNMLRLMIKSGHL

9 DKDVLPLKLGHHIITGVNRILTNTKTKEIFHMFPVIVFNSSKIEYEQMRLELVVLPDAADKLMLTEKVFPRQPFNFPVAVVSSFTALNNMLRLMIKRGHW

***T. equiperdum***

ESAG5p type

300 310 320 330 340 350 360 370 380 390

1 MVHVPFPLRYVFSKTAQRQLDRLCFGCGSEATFELKTAPWLNLSLNEKMVTVKFQDVEVTVDLLPRVGAPISLFSMLMNVSVQAAHIALIDGVAHANLDS

2 MVHVPFPLRYVFSKTAQRQLDRLCFGCGSEATFELKTAPWLNLSLNEKMVTVKFQDVEVTVDLLPRGGAPISLFSMLMNVSVQAAHIALIDGVAHANLDS

3 MVHVPFPLRYVFSKTAQRQLDRLCFGCGSEATFELKTAPWLNLSLNEKMVTVKFQDVEVTVDLLPRGGAPISLFSMLMNVSVQAAHIALIDGVAHANLDS

4 MVHVPFPLRYVFSKTAQRQLDRLCFGCGSEATFELKTAPWLNLSLNEKMVTVKFQDVEVTVDLLPRGGAPISLFSMLMNVSVQAAHIALIDGVAHANLDS

5 MVHVPFPLRYVFSKTAQRQLDRLCFGCGSEATFELKTAPWLNLSLNEKMVTVKFQDVEVTVDLLPRGGAPISLFSMLMNVSVQAAHIALIDGVAHANLDS

6 MVHVPFPLRYVFSKTAQRQLDRLCFGCGSEATFELKTAPWLNLSLNEKMVTVKFQDVEVTVDLLPRGGAPISLFSMLMNVSVQAAHIALIDGVAHANLDS

*T. b. gambiense*

1 VVRVPFPLRYVFSNAAQRQLDSLFCGCSEATFELKAAPWLKYLNEKLVTVKFQDVEVTVDLLPRGGDPISLFSMLMNVSVVEAVHIALIDGVAHANLDS

2 VVRVPFPLRYVISSNAAQRQLDRLCSGCSEATFELKTAPWLKSLNKKLFTFNRYRDVEVAVDILLPRGGAPISLFSMLMNVSAQAAHIALVDGATHANLDS

3 VVRVPFPLRYVFSNAAQRQLDSLFCGCSEATFELKAAPWLKSLNEKLVTVKFQDVEVTVDLLPRGGDPISLFSMLMNVSVETVHIALIDGVAHANLDS

4 MVHVPFPLRYVFSKTAQRQLDSLFCGCSEATFELKTAPWLNLSLNEKLVTVKFQDVEVTVDLLPRGGAPISLFSMLMNVSVVEAVHIALIDGVAHANLDS

6 VVRVPFPLRYVFSNAAQRQLDSLFCGCSEATFELKTAPWLNLSLNEKMVTVKFQDVEVTVDLLPRGGDPISLFSMLMNVSVETVHIALIDGVAHANLDS

7 VVRVPFPLRYVFSNAAQRQLDSLFCGCSEATFELKTAPWLKSLNEKLVTVKFQDVEVTVDLLPRGGDPISLFSMLMNVSVETVHIALIDGVAHANLDS

8 VVRVPFPLRYVFSNAAQRQLDSLFCGCSEATFELKTAPWLNLSVNEKMVTVKFQDVEVTVDLLPRGGAPISLFSMLMNVSVQAAHIALIDGVAHANLDS

9 VVRVPFPLRYVISSNAAQRQLDRLCSGCSEATFELKTAPWLKSLNKKLFTFNRYRDVEVAVDILLPRGGAPISLFSMLMNVSAQAAHIALVDGATHANLDS

10 VVRVPFPLRYVFSNAAQRQLDSLCPGCSEATFELKTAPWLNLSLNEKLVTVMFQDVFYVSMPLPRGGDPISLFSMLMNVSVQAAHIALIDGVAHANLDS

11 VVRVPFPLRYVFSNAAQRQLDSLFCGCSEATFELKTAPWLKSLNEKLVTVKFQDVEVTVDLLPRGGDPISLFSMLMNVSVETVHIALIDGVAHANLDS

12 VVRVPFPLRYVFSNAAQRQLDSLFCGCSEATFELKTAPWLKSLNEKLVTVKFQDVEVTVDLLPRGGDPISLFSMLMNVSVETVHIALIDGVAHANLDS

13 VVRVPFPLRYVFSKTAQRQLDRLCFGCGSEATFELKTAPWLKSLNEKLVTVKFQDVEVTVDLLPRGGDPISLFSMLMNVSVETVHIALIDGVAHANLDS

14 VVRVPFPLRYVFSNAAQRQLDSLFCGCSEATFELKTAPWLKSLNEKLVTVKFQDVEVTVDLLPRGGDPISLFSMLMNVSVETVHIALIDGVAHANLDS

15 VVRVPFPLRYVFSNAAQRQLDSLFCGCSEATFELKTAPWLNLSLNEKMVTVKFQDVEVTVDLLPRGGDPISLFSMLMNVSVETVHIALIDGVAHANLDS

16 VVRVPFPLRYVFSNAAQRQLDSLFCGCSEATFELKAAPWLKSLNEKMVTVKFQDIEVTVDLLPRGGDPISLFSMLMNVSVQAAHIALIDGVAHANLDS

17 MVHVPFPLRYVFSKTAQRQLDRLCFGCGSEATFELKTAPWLNLSLNEKMVTVKFQDVEVTVDLLPRGGAPISLFSMLMNVSVQAAHIALIDGVAHANLDS

*T. b. brucei*

1 MVHVPFPLRYVFSKTAQRQLDRLCFGCGSEATFELKTAPWLNLSLNEKMVTVKFQDVEVTVDLLPRGGAPISLFSMLMNVSVQAAHIALIDGVAHANLDS

2 VVRVPFPLRYVISSNAAQRQLDRLCSGCSEATFELKTAPWLKSLNKKLFTFNRYRDVEVAVDILLPRGGAPISLFSMLMNVSAQAAHIALVDGATHANLDS

3 MVHVPFPLRYVFSNAAQRQLDRLCSGCSEATFELKTAPWLKSLNEKMVTVKFQDVEVAVDILLPRGGAPISLFSMLMNVSAQAAHIALVDGVAHANLDS

4 VVRVPFPLRYVISSNAAQRQLDRLCSGCSEATFELKTAPWLKSLNKKLFTFNRYRDVEVAVDILLPRGGAPISLFSMLMNVSVQAAHIALVDGATHANLDS

5 VVRVPFPLRYVISSNAAQRQLDRLCSGCSEATFELKTAPWLKSLNKKLFTFNRYRDVEVAVDILLPRGGAPISLFSMLMNVSVQAAHIALVDGATHANLDS

6 MVHVPFPLRYVFSKTAQRQLDRLCFGCGSEATFELKTAPWLNLSLNEKMVTVKFQDVEVTVDLLPRGGAPISLFSMLMNVSVQAAHIALIDGVAHANLDS

7 MVHVPFPLRYVFSKTAQRQLDRLCFGCGSEATFELKTAPWLNLSLNEKMVTVKFQDVEVTVDLLPRGGAPISLFSMLMNVSVQAAHIALIDGVAHANLDS

8 VVRVPFPLRYVISSNAAQRQLDRLCSGCSEATFELKTAPWLKSLNKKLFTFNRYRDVEVAVDILLPRGGAPISLFSMLMNVSVQAAHIALVDGATHANLDS

9 VVRVPFPLRYVFYSKATQRQLDSLFCGCSEATFELKTAPWLKSLNEKLVTVKFQDVEVAVDILLPRGGDPISLFSMLMNVSVVEAVHIALIDGVAHANLDS

*T. equiperdum*

## ESAG5p type

400 410 420 430 440 450 460 470 480

***T. b. gambiense***

1 VDTNVSVTSSRIDGLDSSIMNTKIRDLINGMVLPLLNFKRYAFPAPFDLSGIHLNITTEGGIAGVDLVRALGSL SILPHLR  
2 VDTNVSVTSSRIDGLNSSTMNTKIRDLINGMVLPLLNFKRYAFPAPFDLSGIHLNITTEGGIAGVDLVRALGSL SILPHLR  
3 VDTNVSVTSSRIDGLNSSTMNTKIRDLINGMVLPLLNFKRYAFPAPFDLSGIHLNITTEGGIAGVDLVRALGSL SILPHLR  
4 VDTNVSVTSSRIDGLNSSTMNTKIRDLINGMVLPLLNFKRYAFPAPFDLSGIHLNITTEGGIAGVDLVRALGSL SILPHLR  
5 VDTNVSVTSSRIDGLNSSTMNTKIRDLINGMVLPLLNFKRYAFPAPFDLSGIHLNITTEGGIAGVDLVRALGSL SILPHLR  
6 VDTNVSVTSSRIDGLNSSTMNTKIRDLINGMVLPLLNFKRYAFPAPFDLSGIHLNITTEGGIAGVDLVRALGSL SILPHLR

---

## ***T. b. brucei***

1 VDTNVSVTSSRIDGLDSSIMNTKIRDLINGMVLPLLNFKRYAFPAPFDLSGMHLNITTEGGIAGVDLVRALGSL SILPHLR  
2 VDTNVSVTSSRIDGLDSSIMNTKIRDLINGMVLPLLNFKRYAFPAPFDLSGMHLNITTEGGIAGVDLVRALGSL SILPHLR  
3 VDTNVSVTSSRIDGLDSSIMNTKIRDLINGMVLPLLNFKRYAFPAPFDLSGIHLNITTEGGIAGVDLVRALGSL SILPHLR  
4 VDTNVSVTSSRIDGLDSSIMNTKIRDLINGMVLPLLNFKRYAFPAPFDLSGMHLNITTEGGIAGVDLVRALGSL SILPHLR  
6 VDTNVSVTSSRIDGLDSSIMNTKIRDLINGMVLPLLNFKRYAFPAPFDLSGIHLNITTEGGIAGVDLVRALGSL SILPHLR  
7 VDTNVSVTSSRIDGLDSSIMNTKIRDLINGMVLPLLNFKRYAFPAPFDLSGIHLNITTEGGIAGVDLVRALGSL SILPHLR  
8 VDTNVSVTSSRIDGLYSSIMNTKIRDLINGMVLPLLNFKRYAFPAPFDLSGIHLNITTEGGIAGVDLVRALGSL SILPHLR  
9 VDTNVSVTSSRIDGLDSSIMNTKIRDLINGMVLPLLNFKRYAFPAPFDLSGMHLNITTEGGIAGVDLVRALGSL SILPHLR  
10 VDAAMSVTSSRIDGLDSSIMNTKIRDLINGMVLPLLNFKRYAFPAPFDLSGIHLNITTEGGIAGVDLVRALRSL SILPHLR  
11 VDTNVSVTSSRIDGLDSSIMNTKIRDLINGMVLPLLNFKRYAFPAPFDLSGMHLNITTEGGIAGVDLVRALGSL SILPHLR  
12 VDTNVSVTSSRIDGLDSSIMNTKIRDLINGMVLPLLNFKRYAFPAPFDLSGMHLNITTEGGIAGVDLVRALGSL SILPHLR  
13 VDTNVSVTSSRIDGLDSSIMNTKIRDLINGMVLPLLNFKRYAFPAPFDLSGIHLNITTEGGIAGVDLVRALGSL SILPHLR  
14 VDTNVSVTSSRIDGLDSSIMNTKIRDLINGMVLPLLNFKRYAFPAPFDLSGMHLNITTEGGIAGVDLVRALGSL SILPHLR  
15 VDTNVSVTSSRIDGLDSSIMNTKIRDLINGMVLPLLNFKRYAFPAPFDLSGIHLNITTEGGIAGVDLVRALGSL SILPHLR  
16 VDTNVSVTSSRIDGLDSSIMNTKIRDLINGMVLPLLNFKRYAFPAPFDLSGIHLNITTEGGIAGVDLVRALGSL SILPHLR  
17 VDTNVSVTSSRIDGLDSSIMNTKIRDLINGMVLPLLNFKRYAFPAPFDLSGIHLNITTEGGIAGVDLVRALGSL SILPHLR

---

## ***T. equiperdum***

1 VDTNVSVTSSRIDGLDSSIMNTNIRDLINGMVLPLLNFKRYAFPAPFDLSGIHLNITSEGGIAGVDLVRALGSL SILPHLR  
2 VDTNVSVTSSRIDGLDSSIMNTKIRDLINGMVLPLLNFKRYAFPAPFDLSGMHLNITSECYVAGFNLVRALGSL SILPHLR  
3 VDTNVSVTSSRIDGLDSSIMNTKIRDLINGMVLPLLNFKRYAFPAPFDLSGMHLNITTEGGIAGVDLVRALGSL SILPYLR  
4 VDTNVSVTSSRIDGLDSSIMNTKIRDLINGMVLPLLNFKRYAFPAPFDLSGMHLNITSECYVAGFNLVRALGSL SILPHLR  
5 VDTNVSVTSSRIDGLDSSIMNTKIRDLINGMVLPLLNFKRYAFPAPFDLSGMHLNITSECYVAGFNLVRALGSL SILPHLR  
6 VDTNVSVTSSRIDGLDSSIMNTKIRDLINGMVLPLLNFKRYAFPAPFDLSGIHLNITSECGIAGVDLVRALGSL SILPHLR  
7 VDTNVSVTSSRIDGLDSSIMNTKIRDLINGMVLPLLNFKRYAFPAPFDLSGIHLNITSECGIAGVDLVRALGSL SILPHLR  
8 VDTNVSVTSSRIDGLDSSIMNTKIRDLINGMVLPLLNFKRYAFPAPFDLSGMHLNITSECYVAGFNLVRALGSL SILPHLR  
9 VDTNVSVTSSRIDGLDSSIMNTKIRDLINGMVLPLLNFKRYAFPAPFDLSGIHLNITSECYVAGFNLVRALGSL SILPHLR
