# Supplementary material for: Isolation and analysis of the genetic diversity of repertoires of VSG expression site containing telomeres from Trypanosoma brucei gambiense, T. b. brucei and T. equiperdum
Source: PubMed Central journal article supplement (PMC2533676; doi:10.1186/1471-2164-9-385), 2008-08-12
Supplement: 1471-2164-9-385-S6.pdf [file 1471-2164-9-385-S6.pdf]

Supplementary Table 2

## Non-synonymous substitution rates within BESs

| Locus  | Subspecies                     | Parameters (M1a)               | Parameters (M2a)               | 2 $\Delta$ ln L       | p-value                |
|--------|--------------------------------|--------------------------------|--------------------------------|-----------------------|------------------------|
| ESAG6  | T.b.g.                         | $\omega_0=0.000$ , $p_0=0.560$ | $\omega_0=0.157$ , $p_0=0.752$ | 3.460                 | 0.177                  |
|        |                                | $\omega_1=1.000$ , $p_1=0.440$ | $\omega_1=1.000$ , $p_1=0.216$ |                       |                        |
|        |                                |                                | $\omega_2=7.215$ , $p_2=0.032$ |                       |                        |
|        | T.b.b.                         | $\omega_0=0.031$ , $p_0=0.708$ | $\omega_0=0.043$ , $p_0=0.724$ | 61.58                 | $4.25 \times 10^{-14}$ |
|        |                                | $\omega_1=1.000$ , $p_1=0.292$ | $\omega_1=1.000$ , $p_1=0.220$ |                       |                        |
|        |                                |                                | $\omega_2=4.132$ , $p_2=0.056$ |                       |                        |
| T. eq. | $\omega_0=0.000$ , $p_0=0.536$ | $\omega_0=0.000$ , $p_0=0.711$ | 6.276                          | 0.043                 |                        |
|        | $\omega_1=1.000$ , $p_1=0.464$ | $\omega_1=1.000$ , $p_1=0.022$ |                                |                       |                        |
|        |                                | $\omega_2=2.207$ , $p_2=0.266$ |                                |                       |                        |
| ESAG5  | T.b.g.                         | $\omega_0=0.691$ , $p_0=1.000$ | $\omega_0=0.557$ , $p_0=0.686$ | -0.010                | 1.000                  |
|        |                                | $\omega_1=1.000$ , $p_1=0.000$ | $\omega_1=1.000$ , $p_1=0.314$ |                       |                        |
|        |                                |                                | $\omega_2=1.010$ , $p_2=0.000$ |                       |                        |
|        | T.b.b.                         | $\omega_0=0.000$ , $p_0=0.484$ | $\omega_0=0.262$ , $p_0=0.852$ | 71.95                 | $2.22 \times 10^{-16}$ |
|        |                                | $\omega_1=1.000$ , $p_1=0.516$ | $\omega_1=1.000$ , $p_1=0.000$ |                       |                        |
|        |                                |                                | $\omega_2=4.056$ , $p_2=0.148$ |                       |                        |
| T. eq. | $\omega_0=0.000$ , $p_0=0.441$ | $\omega_0=0.000$ , $p_0=0.544$ | 14.70                          | $6.42 \times 10^{-4}$ |                        |
|        | $\omega_1=1.000$ , $p_1=0.559$ | $\omega_1=1.000$ , $p_1=0.317$ |                                |                       |                        |
|        |                                | $\omega_2=3.186$ , $p_2=0.140$ |                                |                       |                        |
| ESAG2  | T.b.g.                         | $\omega_0=0.021$ , $p_0=0.714$ | $\omega_0=0.032$ , $p_0=0.735$ | 10.63                 | 0.005                  |
|        |                                | $\omega_1=1.000$ , $p_1=0.286$ | $\omega_1=1.000$ , $p_1=0.236$ |                       |                        |
|        |                                |                                | $\omega_2=5.335$ , $p_2=0.029$ |                       |                        |
|        | T.b.b.                         | $\omega_0=0.058$ , $p_0=0.691$ | $\omega_0=0.060$ , $p_0=0.689$ | 40.72                 | 0.000                  |
|        |                                | $\omega_1=1.000$ , $p_1=0.309$ | $\omega_1=1.000$ , $p_1=0.289$ |                       |                        |
|        |                                |                                | $\omega_2=5.220$ , $p_2=0.021$ |                       |                        |
| T. eq. | $\omega_0=0.163$ , $p_0=0.848$ | $\omega_0=0.217$ , $p_0=0.970$ | 7.521                          | 0.023                 |                        |
|        | $\omega_1=1.000$ , $p_1=0.152$ | $\omega_1=1.000$ , $p_1=0.000$ |                                |                       |                        |
|        |                                | $\omega_2=6.592$ , $p_2=0.030$ |                                |                       |                        |

**Sup. Table 2. Non-synonymous substitution rates for different genes located within trypanosome BESs.** Sequences from different BES loci from *Trypanosoma brucei gambiense* DAL 972 (T.b.g.), *T. b. brucei* EATRO 2340 (T.b.b.), or *T. equiperdum* STIB 818 (T. eq) were analysed. The dN/ dS ratio ( $\omega$ ) and weights ( $p$ ) of discrete priors for the relative rate of non-synonymous (dN) to synonymous (dS) substitutions under models M1a (2 atoms) and M2a (3 atoms); p-value of the difference in log-likelihoods between M2a and M1a under a  $\chi^2$ -distribution with two degrees of freedom. Rows with a p value of  $< 0.05$  indicate significant support for adaptive evolution.
