# Supplementary material for: Isolation and analysis of the genetic diversity of repertoires of VSG expression site containing telomeres from Trypanosoma brucei gambiense, T. b. brucei and T. equiperdum
Source: PubMed Central journal article supplement (PMC2533676; doi:10.1186/1471-2164-9-385), 2008-08-12
Supplement: 1471-2164-9-385-S7.pdf [file 1471-2164-9-385-S7.pdf]

Supplementary Table 3

Ratio of nonsynonymous-to-synonymous substitutions

A) ESAG6

| codon | AA | Tbg          | Tbr          | Teq          | region |
|-------|----|--------------|--------------|--------------|--------|
| 1     | M  | 0.358        | 0.074        | 0.262        | SP     |
| 2     | R  | 0.390        | 0.651        | 0.344        | SP     |
| 3     | F  | 0.399        | 0.129        | 0.383        | SP     |
| 4     | W  | <b>2.403</b> | <b>4.105</b> | <b>2.182</b> | SP     |
| 5     | F  | 0.399        | 0.779        | 0.383        | SP     |
| 6     | V  | 0.397        | 0.681        | 0.350        | SP     |
| 7     | L  | 0.429        | 0.173        | 0.431        | SP     |
| 8     | L  | 0.429        | 0.160        | 0.431        | SP     |
| 9     | A  | 0.450        | 0.711        | 0.454        | SP     |
| 10    | L  | <b>2.505</b> | 0.924        | 0.439        | SP     |
| 11    | L  | 0.429        | 0.160        | 0.431        | SP     |
| 12    | G  | 0.392        | 0.623        | 0.339        | SP     |
| 13    | K  | 0.377        | 0.088        | 0.302        | SP     |
| 14    | E  | 0.373        | 1.839        | 0.293        | SP     |
| 15    | I  | 0.391        | 1.375        | 0.335        | SP     |
| 16    | Y  | 0.421        | <b>4.075</b> | <b>2.147</b> | SP     |
| 17    | A  | 0.393        | 0.096        | 0.329        | SP     |
| 18    | -  | 0.568        | 0.198        | <b>2.147</b> |        |
| 19    | -  | 0.568        | 0.174        | 0.419        |        |
| 20    | Y  | 0.421        | 0.148        | 0.419        |        |
| 21    | E  | 0.373        | 0.546        | 0.293        |        |
| 22    | N  | 0.371        | 0.092        | 0.306        |        |
| 23    | E  | 0.373        | 1.181        | <b>2.135</b> |        |
| 24    | R  | 0.390        | 0.104        | 0.344        |        |
| 25    | N  | 0.371        | 0.092        | 0.306        |        |
| 26    | A  | 0.386        | 0.096        | 0.325        |        |
| 27    | L  | 0.431        | 0.159        | 0.431        |        |
| 28    | N  | 0.404        | 0.122        | 0.378        |        |
| 29    | A  | 0.386        | 0.095        | 0.325        |        |
| 30    | T  | 0.428        | 0.164        | 0.397        |        |
| 31    | A  | 0.450        | 0.159        | 0.461        |        |
| 32    | A  | 0.403        | 0.121        | 0.417        |        |
| 33    | N  | 0.371        | 0.092        | 0.386        |        |
| 34    | K  | 0.377        | 0.088        | 0.383        |        |
| 35    | V  | 0.412        | 0.109        | 0.422        |        |
| 36    | C  | 0.420        | 0.148        | 0.478        |        |
| 37    | G  | <b>2.248</b> | 1.619        | <b>2.152</b> |        |
| 38    | L  | 0.442        | 0.175        | 0.498        |        |
| 39    | S  | 0.440        | 0.160        | 0.491        |        |

|    |   |       |              |              |
|----|---|-------|--------------|--------------|
| 40 | T | 0.456 | 0.168        | 0.511        |
| 41 | Y | 0.421 | 0.148        | 0.475        |
| 42 | L | 0.430 | 0.157        | 0.490        |
| 43 | K | 0.377 | 0.088        | 0.383        |
| 44 | G | 0.392 | 0.099        | 0.413        |
| 45 | I | 0.367 | 0.077        | 0.362        |
| 46 | A | 0.397 | 0.107        | 0.424        |
| 47 | H | 0.445 | 0.172        | 0.504        |
| 48 | R | 0.388 | 0.099        | 0.409        |
| 49 | V | 0.387 | 0.095        | <b>2.147</b> |
| 50 | N | 0.404 | 0.745        | 0.444        |
| 51 | S | 0.421 | 0.834        | 0.473        |
| 52 | E | 0.380 | 0.092        | 0.395        |
| 53 | S | 0.384 | 0.105        | 0.416        |
| 54 | A | 0.403 | 0.142        | 0.443        |
| 55 | V | 0.397 | 0.106        | 0.422        |
| 56 | V | 0.403 | 0.116        | <b>2.151</b> |
| 57 | T | 0.402 | 0.112        | 0.432        |
| 58 | E | 0.373 | 0.086        | 0.374        |
| 59 | K | 0.377 | 0.088        | 0.383        |
| 60 | L | 0.442 | 0.175        | 0.498        |
| 61 | S | 0.442 | 0.157        | 0.489        |
| 62 | D | 0.366 | 0.088        | 0.376        |
| 63 | L | 0.429 | 0.160        | 0.484        |
| 64 | K | 0.377 | 0.089        | 0.383        |
| 65 | M | 1.556 | 0.476        | 0.349        |
| 66 | R | 0.388 | 0.621        | 0.409        |
| 67 | S | 0.421 | 0.180        | 0.473        |
| 68 | I | 0.431 | 0.185        | 0.484        |
| 69 | Q | 0.433 | 0.208        | 0.488        |
| 70 | L | 0.429 | 0.200        | 0.484        |
| 71 | Q | 0.451 | 0.201        | 0.488        |
| 72 | L | 0.514 | 0.221        | 0.498        |
| 73 | S | 0.415 | 0.197        | 0.489        |
| 74 | V | 0.359 | 1.252        | <b>2.179</b> |
| 75 | M | 0.331 | 0.660        | 0.349        |
| 76 | R | 0.427 | 0.223        | 0.521        |
| 77 | N | 0.375 | 0.159        | 0.444        |
| 78 | R | 0.359 | 0.132        | 0.409        |
| 79 | V | 0.369 | 0.140        | 0.422        |
| 80 | P | 0.414 | 0.210        | 0.499        |
| 81 | S | 0.403 | 0.197        | 0.487        |
| 82 | G | 0.422 | 0.204        | 0.506        |
| 83 | E | 0.352 | 0.125        | 0.394        |
| 84 | K | 1.807 | <b>3.959</b> | 0.402        |
| 85 | D | 0.338 | 0.118        | 0.376        |
| 86 | C | 0.391 | 0.188        | 0.478        |
| 87 | K | 0.349 | 0.119        | 0.383        |
| 88 | D | 0.366 | 0.151        | 0.434        |

|     |   |       |              |              |
|-----|---|-------|--------------|--------------|
| 89  | I | 0.413 | 0.183        | 0.460        |
| 90  | R | 0.361 | 0.813        | 0.417        |
| 91  | T | 0.362 | 0.133        | 0.410        |
| 92  | L | 0.452 | 0.255        | 0.537        |
| 93  | L | 0.401 | 0.200        | 0.484        |
| 94  | K | 0.349 | 0.119        | 0.383        |
| 95  | T | 0.362 | 0.133        | 0.410        |
| 96  | V | 0.359 | 0.127        | 0.399        |
| 97  | L | 0.401 | 0.200        | 0.484        |
| 98  | R | 0.361 | 0.138        | 0.417        |
| 99  | N | 0.344 | 0.124        | 0.386        |
| 100 | E | 0.352 | 0.125        | 0.394        |
| 101 | F | 0.371 | 0.166        | 0.448        |
| 102 | T | 0.362 | 0.133        | 0.410        |
| 103 | F | 0.407 | 0.207        | 0.496        |
| 104 | Q | 0.405 | 0.208        | 0.488        |
| 105 | Q | 0.405 | 0.208        | 0.488        |
| 106 | E | 0.352 | 0.125        | 0.394        |
| 107 | L | 0.401 | 0.200        | 0.484        |
| 108 | E | 0.352 | 0.125        | <b>2.147</b> |
| 109 | E | 0.345 | 0.115        | 0.374        |
| 110 | M | 0.331 | 0.101        | <b>2.143</b> |
| 111 | R | 0.361 | 0.138        | 0.417        |
| 112 | N | 0.375 | 0.159        | 0.444        |
| 113 | A | 0.358 | <b>1.995</b> | 0.401        |
| 114 | S | 0.452 | 0.256        | 0.535        |
| 115 | A | 0.369 | 0.140        | 0.424        |
| 116 | L | 0.404 | 0.199        | 0.484        |
| 117 | A | 0.358 | 0.127        | 0.401        |
| 118 | A | 0.358 | 0.127        | 0.401        |
| 119 | A | 0.374 | 0.152        | 0.443        |
| 120 | A | 0.358 | 0.127        | 0.401        |
| 121 | A | 0.374 | 0.152        | 0.443        |
| 122 | G | 0.367 | 0.139        | 0.424        |
| 123 | L | 0.401 | <b>4.132</b> | <b>2.175</b> |
| 124 | A | 0.358 | 0.127        | 0.401        |
| 125 | A | 0.374 | 0.168        | 0.447        |
| 126 | G | 0.363 | 0.131        | 0.413        |
| 127 | R | 0.359 | 0.132        | 0.409        |
| 128 | L | 0.427 | 0.233        | 0.511        |
| 129 | E | 0.345 | 0.115        | 0.374        |
| 130 | E | 0.376 | 0.124        | 0.395        |
| 131 | W | 0.411 | 0.071        | 0.499        |
| 132 | I | 0.363 | 0.046        | 0.424        |
| 133 | F | 0.371 | 0.050        | 0.448        |
| 134 | V | 0.359 | 0.045        | 0.399        |
| 135 | F | 0.371 | 0.050        | 0.448        |
| 136 | A | 0.358 | 0.045        | 0.401        |
| 137 | Q | 0.423 | 0.064        | 0.485        |

|     |   |              |              |              |    |
|-----|---|--------------|--------------|--------------|----|
| 138 | A | 0.362        | 0.045        | 0.414        |    |
| 139 | A | 1.819        | 0.084        | <b>2.181</b> |    |
| 140 | D | 0.422        | 1.063        | <b>2.140</b> |    |
| 141 | R | 1.573        | 1.007        | <b>2.164</b> |    |
| 142 | S | 0.415        | 0.336        | 0.310        |    |
| 143 | S | 0.415        | 0.060        | 0.310        |    |
| 144 | Q | 0.405        | 0.366        | 0.304        |    |
| 145 | F | 0.371        | 0.050        | 0.233        |    |
| 146 | C | 0.436        | 0.077        | 0.381        |    |
| 147 | I | 0.340        | 0.043        | 0.125        |    |
| 148 | S | 0.399        | 0.053        | 0.269        |    |
| 149 | V | <b>4.967</b> | 1.056        | <b>2.198</b> | HV |
| 150 | G | 0.367        | 0.046        | 0.198        | HV |
| 151 | K | 0.357        | 1.003        | <b>2.166</b> | HV |
| 152 | T | <b>5.664</b> | <b>3.531</b> | <b>2.126</b> | HV |
| 153 | I | <b>6.761</b> | <b>4.030</b> | <b>2.185</b> | HV |
| 154 | P | 1.920        | 0.882        | 0.268        | HV |
| 155 | P | 0.374        | 0.111        | <b>2.122</b> | HV |
| 156 | E | 0.376        | 0.099        | 0.142        | HV |
| 157 | Q | <b>2.305</b> | 1.636        | <b>2.146</b> | HV |
| 158 | N | <b>5.477</b> | <b>3.709</b> | <b>2.120</b> | HV |
| 159 | N | 0.375        | 0.750        | 0.227        | HV |
| 160 | L | 0.401        | 0.158        | 0.299        |    |
| 161 | Q | 0.395        | 0.153        | 0.278        |    |
| 162 | E | 0.345        | 0.084        | 0.142        |    |
| 163 | C | 0.391        | 0.147        | 0.285        |    |
| 164 | F | 0.371        | 0.127        | 0.233        |    |
| 165 | D | 0.338        | 0.086        | 0.168        |    |
| 166 | G | 0.363        | 0.097        | 0.185        |    |
| 167 | T | 1.648        | 1.412        | <b>2.116</b> |    |
| 168 | I | 0.363        | 0.106        | 0.198        |    |
| 169 | G | 0.363        | 0.097        | 0.185        |    |
| 170 | P | 0.414        | 0.167        | 0.326        |    |
| 171 | E | 0.345        | 0.084        | 0.142        |    |
| 172 | T | 0.429        | 0.169        | 0.354        |    |
| 173 | L | 0.403        | 0.155        | 0.309        |    |
| 174 | Y | 0.443        | 0.198        | 0.390        |    |
| 175 | K | 0.349        | 0.087        | 0.149        |    |
| 176 | I | 0.363        | 0.106        | 0.198        |    |
| 177 | E | 0.352        | 0.092        | 0.163        |    |
| 178 | D | 0.338        | 0.086        | 0.138        |    |
| 179 | S | 0.415        | 0.155        | 0.310        |    |
| 180 | R | 0.415        | 0.170        | 0.338        |    |
| 181 | V | 0.359        | 0.093        | 0.170        |    |
| 182 | K | 0.349        | 0.087        | 0.149        |    |
| 183 | E | 0.352        | 0.092        | 0.163        |    |
| 184 | S | 0.414        | 0.158        | 0.313        |    |
| 185 | A | 0.369        | 0.095        | 0.192        |    |
| 186 | K | <b>1.955</b> | <b>3.213</b> | <b>2.119</b> |    |

|     |   |              |              |              |              |
|-----|---|--------------|--------------|--------------|--------------|
| 187 | K | 1.648        | 1.286        | <b>2.165</b> |              |
| 188 | S | 1.712        | 0.805        | <b>2.164</b> |              |
| 189 | L | 0.401        | 0.158        | 0.299        |              |
| 190 | Q | <b>2.138</b> | 0.900        | <b>2.176</b> |              |
| 191 | L | 0.452        | 0.209        | 0.412        |              |
| 192 | H | 0.377        | 0.130        | 0.243        |              |
| 193 | E | 0.345        | 0.084        | 0.142        |              |
| 194 | A | 0.369        | <b>2.477</b> | 0.199        |              |
| 195 | L | 0.404        | 0.170        | 0.315        |              |
| 196 | S | 0.415        | 0.155        | 0.310        |              |
| 197 | S | 0.452        | 0.209        | 0.407        |              |
| 198 | I | 0.363        | 0.106        | <b>2.119</b> |              |
| 199 | S | 0.452        | 0.209        | 0.569        |              |
| 200 | F | 0.407        | 0.164        | 0.547        |              |
| 201 | N | 0.372        | <b>4.110</b> | <b>2.157</b> |              |
| 202 | S | 0.393        | 0.137        | 0.533        |              |
| 203 | L | 0.401        | 0.158        | 0.540        |              |
| 204 | G | 0.372        | 0.127        | 0.515        |              |
| 205 | A | 1.648        | 1.529        | 0.504        |              |
| 206 | E | 1.345        | 1.192        | 0.472        |              |
| 207 | S | 0.344        | 0.582        | 0.480        |              |
| 208 | I | 0.394        | 0.139        | 0.539        |              |
| 209 | R | 0.447        | 0.203        | 0.565        | <b>Box 1</b> |
| 210 | G | 0.363        | 0.097        | 0.497        | <b>Box 1</b> |
| 211 | G | 0.363        | 0.097        | 0.497        | <b>Box 1</b> |
| 212 | N | 0.344        | 0.091        | 0.480        | <b>Box 1</b> |
| 213 | G | 0.367        | 0.103        | 0.503        | <b>Box 1</b> |
| 214 | K | 1.544        | <b>3.307</b> | 0.490        | <b>Box 1</b> |
| 215 | D | 0.338        | 0.554        | 0.473        | <b>Box 1</b> |
| 216 | G | 0.363        | 0.613        | 0.497        |              |
| 217 | C | 0.435        | 0.153        | 0.536        |              |
| 218 | N | 0.351        | 0.091        | 0.480        |              |
| 219 | L | 0.401        | 0.158        | 0.540        |              |
| 220 | V | 0.369        | 0.104        | 0.502        |              |
| 221 | R | 0.359        | 0.098        | 0.494        |              |
| 222 | T | 0.375        | 0.099        | 0.495        |              |
| 223 | D | 0.366        | 0.112        | 0.510        | <b>Box 2</b> |
| 224 | T | 1.772        | 0.718        | 0.480        | <b>Box 2</b> |
| 225 | D | 0.375        | 1.233        | 0.516        | <b>Box 2</b> |
| 226 | G | 0.372        | 0.114        | 0.515        | <b>Box 2</b> |
| 227 | I | 0.340        | 0.988        | 0.464        | <b>Box 2</b> |
| 228 | L | 0.404        | 0.160        | 0.540        | <b>Box 2</b> |
| 229 | N | 1.377        | <b>3.300</b> | 0.490        | <b>Box 2</b> |
| 230 | G | 0.367        | 0.103        | 0.503        | <b>Box 2</b> |
| 231 | G | 0.389        | 0.106        | 0.503        | <b>Box 2</b> |
| 232 | S | 0.415        | 0.155        | 0.543        | <b>Box 2</b> |
| 233 | P | 0.402        | 1.512        | 0.541        | <b>Box 2</b> |
| 234 | T | 0.362        | 0.647        | 0.495        | <b>Box 2</b> |
| 235 | R | 0.427        | 0.174        | 0.555        | <b>Box 2</b> |

|     |   |       |              |              |              |
|-----|---|-------|--------------|--------------|--------------|
| 236 | H | 0.419 | 0.170        | 0.551        | <b>Box 2</b> |
| 237 | N | 0.375 | 0.120        | 0.516        | <b>Box 2</b> |
| 238 | L | 0.404 | 0.208        | 0.540        | <b>Box 2</b> |
| 239 | T | 0.374 | 0.154        | 0.508        |              |
| 240 | W | 0.411 | 0.230        | 0.549        |              |
| 241 | G | 0.372 | 0.158        | 0.515        |              |
| 242 | G | 0.372 | 0.158        | 0.515        |              |
| 243 | G | 0.363 | 0.138        | 0.497        |              |
| 244 | V | 0.371 | 0.147        | 0.502        |              |
| 245 | M | 0.331 | 0.107        | 0.456        |              |
| 246 | N | 0.344 | 0.131        | 0.480        |              |
| 247 | F | 0.371 | 0.173        | 0.519        |              |
| 248 | G | 0.363 | 0.138        | 0.497        |              |
| 249 | S | 0.452 | 0.265        | 0.569        |              |
| 250 | Y | 0.393 | 0.195        | 0.535        |              |
| 251 | Q | 0.395 | 0.203        | 0.534        |              |
| 252 | N | 0.375 | 0.166        | 0.516        |              |
| 253 | G | 0.363 | 0.138        | 0.497        |              |
| 254 | S | 0.356 | 0.146        | 0.499        |              |
| 255 | M | 0.331 | 0.107        | 0.456        |              |
| 256 | Y | 0.443 | 0.253        | 0.565        |              |
| 257 | V | 0.375 | 0.159        | 0.514        |              |
| 258 | E | 0.352 | 0.132        | 0.485        |              |
| 259 | G | 0.372 | 0.156        | 0.507        |              |
| 260 | G | 0.372 | 0.153        | 0.502        |              |
| 261 | E | 0.345 | 0.122        | 0.472        |              |
| 262 | Y | 0.443 | 0.253        | 0.565        |              |
| 263 | G | 0.372 | 0.158        | 0.515        |              |
| 264 | D | 0.338 | 0.125        | 0.473        |              |
| 265 | A | 0.374 | 0.160        | 0.515        |              |
| 266 | T | 0.362 | 0.146        | 0.512        |              |
| 267 | E | 0.352 | 1.499        | <b>2.184</b> |              |
| 268 | Y | 0.443 | 1.437        | <b>2.159</b> |              |
| 269 | G | 0.372 | 0.158        | 0.515        |              |
| 270 | A | 0.358 | 0.801        | <b>2.155</b> |              |
| 271 | V | 0.359 | 0.134        | 0.488        |              |
| 272 | R | 0.427 | 0.226        | 0.555        |              |
| 273 | W | 0.411 | 0.230        | 0.549        |              |
| 274 | T | 0.431 | 0.184        | 0.545        |              |
| 275 | E | 0.345 | 1.266        | 0.472        |              |
| 276 | D | 0.338 | 0.125        | 0.473        |              |
| 277 | P | 0.414 | 0.254        | 0.548        |              |
| 278 | S | 0.356 | 0.848        | <b>2.155</b> |              |
| 279 | K | 0.349 | 0.126        | 0.477        |              |
| 280 | V | 0.369 | 0.146        | 0.502        |              |
| 281 | S | 0.393 | 0.188        | 0.533        |              |
| 282 | I | 0.340 | 0.112        | 0.464        |              |
| 283 | F | 0.371 | 0.173        | 0.519        |              |
| 284 | K | 1.417 | <b>2.281</b> | 0.490        |              |

|     |   |       |              |              |
|-----|---|-------|--------------|--------------|
| 285 | D | 0.338 | 0.125        | 0.473        |
| 286 | V | 0.423 | 1.282        | 0.552        |
| 287 | I | 0.363 | 0.149        | 0.503        |
| 288 | R | 0.463 | 0.281        | 0.575        |
| 289 | L | 0.427 | 0.243        | 0.555        |
| 290 | F | 1.640 | 0.173        | 0.519        |
| 291 | A | 0.369 | 0.148        | 0.504        |
| 292 | R | 0.454 | 0.277        | <b>2.161</b> |
| 293 | F | 0.407 | 0.215        | 0.547        |
| 294 | Q | 1.854 | <b>2.188</b> | <b>2.158</b> |
| 295 | E | 0.345 | 0.122        | 0.472        |
| 296 | A | 0.358 | 0.134        | 0.490        |
| 297 | K | 0.349 | 0.126        | 0.477        |
| 298 | N | 0.344 | 0.131        | 0.480        |
| 299 | A | 0.358 | 0.808        | 0.490        |
| 300 | V | 0.369 | 0.147        | 0.502        |
| 301 | M | 1.204 | 0.107        | 0.456        |
| 302 | K | 1.778 | <b>4.122</b> | 0.508        |
| 303 | K | 1.659 | 1.326        | 0.477        |
| 304 | I | 0.340 | 0.112        | 0.464        |
| 305 | K | 0.349 | 0.126        | 0.477        |
| 306 | T | 0.380 | 0.166        | 0.519        |
| 307 | T | 1.703 | 0.166        | 0.519        |
| 308 | V | 0.369 | 0.147        | 0.502        |
| 309 | D | 0.338 | 0.125        | 0.473        |
| 310 | E | 0.345 | 0.122        | 0.472        |
| 311 | L | 0.401 | 0.209        | 0.540        |
| 312 | T | 0.374 | 0.903        | 0.508        |
| 313 | K | 0.349 | 0.126        | 0.477        |
| 314 | C | 0.429 | 0.222        | 0.544        |
| 315 | I | 0.340 | 1.159        | 0.464        |
| 316 | G | 0.367 | 0.146        | 0.503        |
| 317 | Q | 0.405 | <b>2.361</b> | 0.542        |
| 318 | K | 0.357 | 0.131        | 0.492        |
| 319 | E | 0.352 | 0.132        | 0.485        |
| 320 | A | 0.374 | 0.940        | 0.515        |
| 321 | E | 0.345 | 0.129        | 0.485        |
| 322 | L | 0.452 | 0.264        | 0.570        |
| 323 | T | 0.380 | 0.165        | 0.519        |
| 324 | N | 0.344 | 0.804        | 0.480        |
| 325 | D | 0.338 | 0.771        | 0.473        |
| 326 | Q | 0.405 | 0.217        | 0.542        |
| 327 | L | 1.937 | 1.479        | <b>2.159</b> |
| 328 | Y | 0.443 | 0.202        | 0.565        |
| 329 | E | 0.352 | 0.095        | 0.485        |
| 330 | E | 0.345 | 0.087        | 0.472        |
| 331 | F | 0.371 | 0.130        | 0.519        |
| 332 | I | 0.404 | 0.140        | 0.491        |
| 333 | W | 0.411 | 0.180        | 0.549        |

|     |   |              |              |              |
|-----|---|--------------|--------------|--------------|
| 334 | E | 0.352        | 0.095        | 0.485        |
| 335 | T | 0.431        | 0.173        | 0.555        |
| 336 | I | 0.340        | 0.078        | 0.464        |
| 337 | N | <b>5.774</b> | 1.785        | 0.516        |
| 338 | R | 0.360        | 0.100        | <b>2.155</b> |
| 339 | L | 0.401        | 0.161        | 0.540        |
| 340 | E | 0.352        | 0.095        | 0.485        |
| 341 | L | 0.427        | 0.191        | 0.555        |
| 342 | S | 0.415        | 0.158        | 0.543        |
| 343 | K | 0.357        | 0.098        | 0.490        |
| 344 | R | 0.359        | 0.100        | 0.494        |
| 345 | V | 0.369        | 0.654        | 0.502        |
| 346 | S | 0.356        | 0.106        | 0.499        |
| 347 | E | 0.345        | 0.087        | 0.472        |
| 348 | Q | 0.395        | 0.156        | 0.534        |
| 349 | S | 0.463        | <b>3.327</b> | 0.573        |
| 350 | A | 0.403        | <b>2.568</b> | 0.542        |
| 351 | F | 0.404        | 1.858        | 0.540        |
| 352 | G | 0.372        | 0.113        | 0.515        |
| 353 | E | 0.345        | 0.087        | 0.472        |
| 354 | E | 0.345        | 0.600        | 0.472        |
| 355 | E | 0.352        | 0.095        | 0.485        |
| 356 | E | 0.376        | 0.095        | 0.485        |
| 357 | T | 0.375        | 0.113        | 0.508        |
| 358 | I | 0.404        | 0.148        | 0.539        |
| 359 | V | <b>2.102</b> | <b>1.972</b> | 0.555        |
| 360 | K | 0.349        | 0.089        | 0.477        |
| 361 | F | 0.403        | 1.664        | 0.542        |
| 362 | N | 0.375        | 0.124        | 0.516        |
| 363 | Y | 0.393        | 0.149        | 0.535        |
| 364 | T | 0.380        | 0.124        | 0.519        |
| 365 | A | 0.358        | 0.097        | 0.490        |
| 366 | E | 0.345        | 0.089        | 0.472        |
| 367 | P | <b>2.109</b> | 0.168        | 0.548        |
| 368 | V | 0.424        | 0.166        | 0.550        |
| 369 | R | 0.415        | 0.176        | 0.552        |
| 370 | G | 0.363        | 0.100        | 0.497        |
| 371 | P | 0.414        | 0.982        | 0.548        |
| 372 | F | 0.407        | 0.167        | 0.547        |
| 373 | T | 0.374        | 0.113        | 0.508        |
| 374 | V | 0.363        | 1.156        | 0.497        |
| 375 | A | 0.369        | 0.108        | 0.504        |
| 376 | G | 0.367        | 0.106        | 0.503        |
| 377 | A | <b>2.508</b> | <b>3.978</b> | 0.553        |
| 378 | N | 0.375        | 0.742        | 0.516        |
| 379 | A | 0.362        | 1.541        | 0.495        |
| 380 | A | 0.359        | <b>2.171</b> | 0.488        |
| 381 | A | 0.358        | 0.097        | 0.490        |
| 382 | I | 0.359        | 1.344        | 0.488        |



|     |   |              |              |              |
|-----|---|--------------|--------------|--------------|
| 383 | H | 1.822        | 1.412        | 0.542        |
| 384 | L | <b>2.031</b> | 1.715        | 0.544        |
| 385 | S | 0.356        | 0.106        | 0.499        |
| 386 | V | 0.375        | 0.740        | 0.514        |
| 387 | S | 0.403        | 0.923        | 0.542        |
| 388 | T | 0.431        | 0.173        | 0.555        |
| 389 | A | 0.374        | 0.118        | 0.515        |
| 390 | A | 0.358        | 0.097        | 0.490        |
| 391 | L | 0.403        | 0.159        | 0.543        |
| 392 | C | 0.391        | 0.150        | 0.536        |
| 393 | R | 0.391        | <b>2.711</b> | 0.536        |
| 394 | S | 0.415        | 1.677        | 0.543        |
| 395 | A | 0.375        | <b>3.128</b> | <b>2.158</b> |
| 396 | L | 0.404        | 0.161        | 0.540        |
| 397 | L | 0.401        | 0.161        | 0.540        |
| 398 | L | 0.401        | 0.937        | <b>2.157</b> |
| 399 | G | 0.363        | 0.100        | 0.497        |
| 400 | V | 0.369        | 0.108        | 0.502        |
| 401 | L | 0.427        | 1.030        | 0.555        |

## B) ESAG5

| codon | AA | Tbg   | Tbr          | Teq          | region |
|-------|----|-------|--------------|--------------|--------|
| 1     | M  | 0.693 | 0.263        | 0.202        | SP     |
| 2     | S  | 0.695 | 0.339        | 0.483        | SP     |
| 3     | S  | 0.695 | <b>4.051</b> | <b>2.499</b> | SP     |
| 4     | V  | 0.695 | 0.284        | 0.373        | SP     |
| 5     | S  | 0.695 | 0.771        | 1.783        | SP     |
| 6     | S  | 0.695 | 0.288        | 0.384        | SP     |
| 7     | V  | 0.695 | <b>4.046</b> | <b>2.354</b> | SP     |
| 8     | P  | 0.695 | 0.297        | 0.420        | SP     |
| 9     | V  | 0.694 | 0.266        | 0.256        | SP     |
| 10    | L  | 0.695 | 0.615        | 0.389        | SP     |
| 11    | V  | 0.694 | 0.273        | 0.310        | SP     |
| 12    | L  | 0.695 | <b>3.519</b> | <b>2.603</b> | SP     |
| 13    | F  | 0.695 | 0.522        | 0.354        | SP     |
| 14    | N  | 0.694 | <b>4.002</b> | <b>2.141</b> | SP     |
| 15    | S  | 0.695 | 0.315        | 0.443        | SP     |
| 16    | V  | 0.694 | 0.333        | 0.256        | SP     |
| 17    | L  | 0.695 | <b>4.052</b> | <b>2.924</b> | SP     |
| 18    | T  | 0.695 | 0.290        | 0.391        | SP     |
| 19    | L  | 0.694 | 0.269        | 0.296        |        |
| 20    | L  | 0.695 | 0.309        | 0.433        |        |
| 21    | C  | 0.695 | 0.280        | 0.358        |        |
| 22    | C  | 0.695 | 0.280        | 0.358        |        |

|    |   |       |              |              |
|----|---|-------|--------------|--------------|
| 23 | I | 0.694 | 0.274        | 0.328        |
| 24 | I | 0.694 | 0.274        | 0.328        |
| 25 | G | 0.695 | 0.300        | 0.417        |
| 26 | S | 0.695 | 0.445        | 0.327        |
| 27 | G | 0.695 | 0.281        | 0.357        |
| 28 | Q | 0.695 | 0.314        | 0.453        |
| 29 | R | 0.695 | 1.070        | 0.453        |
| 30 | S | 0.695 | 0.274        | 0.327        |
| 31 | S | 0.694 | 0.268        | 0.282        |
| 32 | S | 0.694 | <b>4.010</b> | 1.515        |
| 33 | P | 0.695 | 0.313        | 0.440        |
| 34 | F | 0.694 | 0.265        | 0.258        |
| 35 | T | 0.695 | 0.276        | 0.322        |
| 36 | E | 0.695 | 0.277        | 0.352        |
| 37 | P | 0.695 | 0.289        | 1.774        |
| 38 | A | 0.695 | 1.399        | 0.559        |
| 39 | L | 0.695 | 0.788        | 0.579        |
| 40 | K | 0.695 | 0.530        | 0.546        |
| 41 | P | 0.695 | <b>4.051</b> | <b>2.091</b> |
| 42 | G | 0.695 | 0.382        | 0.541        |
| 43 | G | 0.695 | 0.428        | 0.582        |
| 44 | V | 0.694 | 0.940        | 1.875        |
| 45 | K | 0.694 | 0.353        | 0.510        |
| 46 | V | 0.694 | 0.317        | 0.460        |
| 47 | A | 0.694 | 1.032        | 0.466        |
| 48 | I | 0.694 | 0.303        | 0.435        |
| 49 | Q | 0.695 | 0.454        | 0.605        |
| 50 | E | 0.694 | 0.343        | 0.501        |
| 51 | A | 0.694 | 0.357        | 0.513        |
| 52 | A | 0.694 | 0.320        | 0.466        |
| 53 | V | 0.694 | <b>3.484</b> | <b>1.951</b> |
| 54 | T | 0.694 | <b>3.598</b> | <b>1.996</b> |
| 55 | P | 0.695 | 0.449        | 0.598        |
| 56 | L | 0.695 | 0.466        | 0.607        |
| 57 | L | 0.695 | 0.447        | 0.600        |
| 58 | P | 0.695 | 0.449        | 0.598        |
| 59 | A | 0.695 | 1.651        | <b>2.039</b> |
| 60 | L | 0.694 | 0.338        | 0.494        |
| 61 | A | 0.694 | 0.357        | 0.513        |
| 62 | D | 0.694 | 1.076        | <b>1.968</b> |
| 63 | E | 0.694 | 0.343        | 0.501        |
| 64 | F | 0.695 | 0.376        | 0.538        |
| 65 | E | 0.695 | 0.369        | 0.537        |
| 66 | R | 0.695 | 0.372        | 0.529        |
| 67 | F | 0.694 | 0.315        | 0.460        |
| 68 | M | 0.693 | 0.292        | 0.406        |
| 69 | E | 0.694 | 0.343        | 0.501        |
| 70 | N | 0.755 | 0.961        | 0.461        |
| 71 | I | 0.694 | 0.360        | 0.519        |

|     |   |       |              |              |
|-----|---|-------|--------------|--------------|
| 72  | T | 0.695 | 0.409        | 0.563        |
| 73  | I | 0.694 | 0.303        | 0.435        |
| 74  | P | 0.695 | 0.397        | 0.542        |
| 75  | G | 0.694 | <b>4.025</b> | <b>1.952</b> |
| 76  | Q | 0.695 | 0.454        | 0.605        |
| 77  | K | 0.694 | 1.499        | 0.510        |
| 78  | V | 0.694 | 0.317        | 0.460        |
| 79  | N | 0.695 | 0.377        | 0.539        |
| 80  | G | 0.694 | 1.348        | <b>2.009</b> |
| 81  | V | 0.694 | 0.352        | <b>1.966</b> |
| 82  | S | 0.694 | 0.330        | 0.482        |
| 83  | V | 0.695 | 0.390        | 0.553        |
| 84  | E | 0.695 | 0.369        | 0.537        |
| 85  | E | 0.694 | 0.343        | 0.501        |
| 86  | T | 0.694 | 0.326        | 0.473        |
| 87  | Y | 0.695 | 0.373        | 0.534        |
| 88  | F | 0.694 | 0.315        | 0.460        |
| 89  | R | 0.695 | 0.390        | 0.549        |
| 90  | N | 0.695 | 0.377        | 0.539        |
| 91  | V | 0.694 | 0.352        | 0.506        |
| 92  | T | 0.695 | 0.375        | 0.519        |
| 93  | V | 0.695 | 0.364        | 0.551        |
| 94  | G | 0.695 | 0.438        | 0.592        |
| 95  | S | 0.695 | 0.402        | 0.560        |
| 96  | A | 0.694 | 0.347        | 0.513        |
| 97  | K | 0.695 | 1.704        | 0.565        |
| 98  | V | 0.694 | 0.317        | 0.460        |
| 99  | Q | 0.695 | <b>3.727</b> | <b>2.085</b> |
| 100 | F | 0.754 | 0.331        | 0.498        |
| 101 | W | 0.695 | <b>3.834</b> | <b>2.701</b> |
| 102 | G | 0.695 | 1.790        | <b>2.065</b> |
| 103 | S | 0.756 | <b>2.142</b> | <b>2.117</b> |
| 104 | N | 0.695 | 0.338        | 0.460        |
| 105 | K | 0.695 | 0.382        | 0.512        |
| 106 | M | 0.693 | 0.748        | 1.758        |
| 107 | V | 0.694 | 0.940        | 1.780        |
| 108 | W | 0.695 | <b>2.029</b> | <b>2.040</b> |
| 109 | N | 0.695 | 1.467        | 1.921        |
| 110 | F | 0.694 | 0.315        | 0.418        |
| 111 | C | 0.695 | 1.617        | <b>2.024</b> |
| 112 | N | 0.695 | 0.377        | 0.504        |
| 113 | V | 0.694 | 0.352        | 0.466        |
| 114 | S | 0.695 | 0.359        | 0.528        |
| 115 | A | 0.694 | 0.320        | 0.423        |
| 116 | T | 0.755 | 0.326        | 0.431        |
| 117 | V | 0.694 | 0.347        | 0.448        |
| 118 | P | 0.695 | 0.404        | 0.525        |
| 119 | F | 0.694 | 0.315        | 0.418        |
| 120 | T | 0.695 | 0.369        | 0.503        |

|     |   |       |              |              |
|-----|---|-------|--------------|--------------|
| 121 | R | 0.695 | 0.420        | 0.578        |
| 122 | F | 0.694 | 0.289        | 0.418        |
| 123 | V | 0.695 | 0.346        | 0.518        |
| 124 | Y | 0.695 | 0.422        | 0.584        |
| 125 | H | 0.695 | 0.376        | 0.547        |
| 126 | S | 0.695 | 0.382        | 0.546        |
| 127 | F | 0.694 | 0.289        | 0.418        |
| 128 | W | 0.695 | 0.418        | 0.582        |
| 129 | C | 0.695 | 0.341        | 0.508        |
| 130 | Y | 0.695 | 0.422        | 0.584        |
| 131 | L | 0.695 | 1.548        | 0.564        |
| 132 | Y | 0.695 | 0.334        | 0.499        |
| 133 | P | 0.695 | 0.321        | 0.479        |
| 134 | C | 0.695 | 0.425        | 0.586        |
| 135 | S | 0.694 | 0.300        | 0.442        |
| 136 | G | 0.695 | 0.341        | 0.506        |
| 137 | S | 0.695 | 0.375        | 0.542        |
| 138 | A | 0.695 | 0.353        | 0.526        |
| 139 | Q | 0.695 | 0.375        | 0.547        |
| 140 | V | 0.694 | 1.056        | 1.906        |
| 141 | E | 0.695 | 0.330        | 0.502        |
| 142 | I | 0.694 | 0.300        | 0.439        |
| 143 | R | 0.695 | 1.913        | 0.598        |
| 144 | N | 0.695 | 0.337        | 0.504        |
| 145 | A | 0.695 | <b>3.598</b> | <b>2.057</b> |
| 146 | S | 0.694 | 0.300        | 0.442        |
| 147 | V | 0.694 | 0.315        | 0.466        |
| 148 | A | 0.695 | <b>3.561</b> | 0.524        |
| 149 | L | 0.695 | 0.397        | 0.564        |
| 150 | W | 0.695 | 0.418        | 0.582        |
| 151 | L | 0.695 | 0.388        | 0.555        |
| 152 | D | 0.695 | 0.328        | 0.495        |
| 153 | V | 0.694 | 0.315        | 0.466        |
| 154 | S | 0.695 | 0.407        | 0.571        |
| 155 | A | 0.695 | 0.353        | 0.526        |
| 156 | T | 0.695 | <b>4.056</b> | 0.565        |
| 157 | R | 0.695 | 0.333        | 0.493        |
| 158 | G | 0.695 | 1.287        | 0.506        |
| 159 | G | 0.695 | 0.391        | 0.565        |
| 160 | L | 0.695 | <b>4.041</b> | 0.603        |
| 161 | L | 0.695 | 0.441        | 0.603        |
| 162 | D | 0.695 | 1.087        | 0.492        |
| 163 | I | 0.694 | 0.300        | 0.458        |
| 164 | H | 0.694 | 0.312        | <b>2.586</b> |
| 165 | V | 0.694 | 0.297        | 0.475        |
| 166 | G | 0.695 | 0.341        | 0.506        |
| 167 | G | 0.694 | 0.858        | 1.907        |
| 168 | S | 0.695 | 0.382        | 0.546        |
| 169 | A | 0.695 | <b>4.054</b> | <b>2.012</b> |

|     |   |       |              |              |
|-----|---|-------|--------------|--------------|
| 170 | I | 0.694 | 0.281        | 0.388        |
| 171 | G | 0.695 | 0.348        | 0.553        |
| 172 | N | 0.694 | <b>4.056</b> | <b>2.396</b> |
| 173 | D | 0.694 | <b>4.056</b> | <b>2.512</b> |
| 174 | D | 0.695 | 0.328        | 0.495        |
| 175 | P | 0.695 | 0.401        | 0.571        |
| 176 | L | 0.695 | 0.397        | 0.564        |
| 177 | I | 0.694 | 0.300        | 0.439        |
| 178 | T | 0.694 | 0.297        | 0.431        |
| 179 | L | 0.695 | 0.371        | 0.530        |
| 180 | I | 0.694 | 0.322        | 0.482        |
| 181 | G | 0.694 | 0.307        | 0.458        |
| 182 | E | 0.695 | 0.330        | 0.502        |
| 183 | G | 0.695 | 0.341        | 0.506        |
| 184 | K | 0.695 | 0.341        | 0.512        |
| 185 | S | 0.695 | 0.439        | 0.578        |
| 186 | K | 0.694 | 0.317        | 0.472        |
| 187 | V | 0.694 | 0.897        | 1.775        |
| 188 | P | 0.695 | 0.321        | 0.479        |
| 189 | K | 0.694 | 0.317        | 0.472        |
| 190 | W | 0.695 | 0.418        | 0.582        |
| 191 | L | 0.694 | 0.305        | 0.453        |
| 192 | G | 0.695 | 0.382        | 0.553        |
| 193 | G | 0.695 | 0.341        | 0.506        |
| 194 | R | 0.695 | 0.372        | 0.544        |
| 195 | V | 0.694 | 0.290        | 0.415        |
| 196 | K | 0.695 | 0.341        | 0.512        |
| 197 | D | 0.694 | 0.286        | 0.410        |
| 198 | M | 0.693 | 0.470        | 0.360        |
| 199 | Y | 0.695 | 0.305        | 1.944        |
| 200 | D | 0.694 | 0.273        | 0.410        |
| 201 | K | 0.694 | 0.293        | 0.472        |
| 202 | D | 0.694 | 0.273        | 0.410        |
| 203 | V | 0.694 | 0.292        | 0.466        |
| 204 | L | 0.694 | 0.292        | 0.453        |
| 205 | P | 0.695 | 0.363        | 0.569        |
| 206 | K | 0.694 | 0.293        | 0.472        |
| 207 | L | 0.694 | 0.285        | 0.453        |
| 208 | G | 0.695 | 0.311        | <b>1.956</b> |
| 209 | H | 0.694 | 0.290        | 0.230        |
| 210 | H | 0.694 | 0.290        | 0.230        |
| 211 | I | 0.694 | 0.281        | 0.201        |
| 212 | I | 0.694 | 0.270        | 0.156        |
| 213 | T | 0.695 | 0.320        | 0.279        |
| 214 | A | 0.695 | 1.040        | <b>2.802</b> |
| 215 | A | 0.694 | <b>4.049</b> | 1.936        |
| 216 | N | 0.694 | 0.275        | 0.182        |
| 217 | Q | 0.756 | 1.460        | <b>3.074</b> |
| 218 | I | 0.694 | 0.270        | 0.156        |

|     |   |       |              |              |
|-----|---|-------|--------------|--------------|
| 219 | L | 0.695 | 0.359        | 0.366        |
| 220 | A | 0.695 | <b>3.289</b> | <b>2.708</b> |
| 221 | N | 0.755 | 0.308        | 0.271        |
| 222 | K | 0.695 | 0.310        | 0.281        |
| 223 | T | 0.695 | 1.064        | <b>2.714</b> |
| 224 | K | 0.694 | 0.293        | 0.234        |
| 225 | E | 0.694 | 0.287        | 0.224        |
| 226 | I | 0.694 | 0.281        | 0.201        |
| 227 | F | 0.695 | 0.305        | 0.266        |
| 228 | H | 0.694 | 0.290        | 0.230        |
| 229 | M | 0.693 | 0.267        | 0.132        |
| 230 | F | 0.694 | 0.276        | 0.181        |
| 231 | P | 0.695 | 0.360        | 0.362        |
| 232 | I | 0.694 | 0.270        | 0.156        |
| 233 | V | 0.695 | 0.316        | 0.288        |
| 234 | F | 0.694 | 0.275        | 0.181        |
| 235 | V | 0.695 | 0.978        | 0.288        |
| 236 | N | 0.695 | 0.864        | <b>2.003</b> |
| 237 | S | 0.694 | 0.282        | 0.476        |
| 238 | S | 0.695 | 0.297        | 0.513        |
| 239 | K | 0.695 | 0.310        | 0.541        |
| 240 | I | 0.694 | 0.274        | 0.423        |
| 241 | E | 0.695 | 0.302        | 0.532        |
| 242 | Y | 0.695 | 0.305        | 0.529        |
| 243 | G | 0.755 | 0.351        | 0.589        |
| 244 | Q | 0.695 | 0.365        | 0.602        |
| 245 | M | 0.693 | 0.267        | 0.396        |
| 246 | R | 0.695 | 0.335        | 0.571        |
| 247 | L | 0.695 | 0.321        | 0.518        |
| 248 | E | 0.695 | 0.302        | 0.532        |
| 249 | L | 0.695 | 1.210        | 0.589        |
| 250 | V | 0.695 | 0.316        | 0.544        |
| 251 | V | 0.694 | 0.291        | 0.497        |
| 252 | L | 0.695 | 0.649        | 0.506        |
| 253 | P | 0.695 | <b>4.056</b> | <b>2.090</b> |
| 254 | D | 0.694 | 0.273        | 0.446        |
| 255 | A | 0.695 | 0.322        | 0.553        |
| 256 | A | 0.755 | 0.320        | 0.554        |
| 257 | D | 0.695 | 0.300        | 0.526        |
| 258 | Q | 0.695 | <b>4.021</b> | <b>2.639</b> |
| 259 | L | 0.695 | 0.359        | 0.597        |
| 260 | I | 0.693 | 1.246        | 0.396        |
| 261 | L | 0.694 | 0.285        | 0.486        |
| 262 | T | 0.695 | 0.300        | 0.513        |
| 263 | E | 0.694 | 0.287        | 1.938        |
| 264 | K | 0.694 | 0.661        | <b>2.505</b> |
| 265 | V | 0.694 | 0.275        | 0.448        |
| 266 | F | 0.694 | 0.275        | 0.453        |
| 267 | S | 0.695 | <b>3.519</b> | <b>2.020</b> |

|     |   |       |              |              |
|-----|---|-------|--------------|--------------|
| 268 | P | 0.695 | 0.326        | 0.554        |
| 269 | R | 0.695 | 1.531        | 0.602        |
| 270 | H | 0.695 | <b>4.052</b> | 0.573        |
| 271 | P | 0.695 | 0.306        | 0.511        |
| 272 | F | 0.694 | 0.281        | 0.453        |
| 273 | P | 0.695 | 0.378        | 0.595        |
| 274 | N | 0.695 | 0.320        | 0.534        |
| 275 | F | 0.695 | <b>4.051</b> | <b>3.116</b> |
| 276 | P | 0.695 | 0.870        | 0.511        |
| 277 | V | 0.694 | 0.283        | 0.448        |
| 278 | A | 0.694 | 0.578        | 0.457        |
| 279 | V | 0.694 | 0.283        | 0.448        |
| 280 | V | 0.694 | 0.283        | 0.448        |
| 281 | S | 0.695 | 0.311        | 0.513        |
| 282 | S | 0.695 | 0.360        | 0.572        |
| 283 | F | 0.694 | 0.281        | 0.453        |
| 284 | T | 0.695 | 0.312        | 0.513        |
| 285 | A | 0.694 | 0.284        | 0.457        |
| 286 | L | 0.695 | 0.340        | 0.560        |
| 287 | N | 0.694 | 0.548        | 0.454        |
| 288 | N | 0.694 | 0.282        | 0.454        |
| 289 | M | 0.693 | 0.271        | 0.396        |
| 290 | L | 0.694 | 0.294        | 0.486        |
| 291 | R | 0.695 | 0.330        | 0.545        |
| 292 | L | 0.695 | 0.340        | 0.560        |
| 293 | M | 0.693 | 0.271        | 0.396        |
| 294 | I | 0.694 | 0.276        | 0.423        |
| 295 | K | 0.695 | 0.323        | 0.541        |
| 296 | R | 0.694 | <b>3.978</b> | 1.913        |
| 297 | G | 0.695 | 0.360        | 0.439        |
| 298 | H | 0.695 | 1.331        | 0.431        |
| 299 | S | 0.695 | 1.361        | <b>2.462</b> |
| 300 | V | 0.693 | <b>3.926</b> | 1.522        |
| 301 | V | 0.694 | 0.303        | 0.336        |
| 302 | R | 0.694 | <b>3.374</b> | 1.708        |
| 303 | V | 0.694 | 0.320        | 0.366        |
| 304 | P | 0.695 | 0.381        | 0.461        |
| 305 | F | 0.694 | 0.281        | 0.281        |
| 306 | P | 0.695 | 0.375        | 0.414        |
| 307 | L | 0.695 | 0.374        | 0.455        |
| 308 | R | 0.695 | 0.353        | 0.402        |
| 309 | Y | 0.695 | 0.317        | 0.371        |
| 310 | V | 0.694 | 0.283        | 0.281        |
| 311 | F | 0.695 | 1.048        | 1.792        |
| 312 | S | 0.695 | 0.383        | 1.918        |
| 313 | S | 0.695 | 0.338        | 0.406        |
| 314 | N | 0.694 | <b>3.986</b> | <b>2.320</b> |
| 315 | A | 0.695 | <b>4.009</b> | 1.787        |
| 316 | A | 0.694 | 0.284        | 1.573        |

|     |   |       |              |              |
|-----|---|-------|--------------|--------------|
| 317 | Q | 0.695 | 0.354        | 0.431        |
| 318 | R | 0.695 | 0.330        | 0.392        |
| 319 | Q | 0.695 | 0.354        | 0.431        |
| 320 | L | 0.695 | 0.350        | 0.412        |
| 321 | D | 0.695 | 0.312        | 0.367        |
| 322 | S | 0.695 | <b>3.971</b> | 1.766        |
| 323 | L | 0.694 | 0.294        | 0.320        |
| 324 | C | 0.695 | 1.655        | 0.483        |
| 325 | F | 0.695 | <b>3.944</b> | <b>2.297</b> |
| 326 | G | 0.695 | 0.369        | 0.455        |
| 327 | C | 0.695 | 0.323        | 0.381        |
| 328 | A | 0.695 | <b>3.534</b> | 1.839        |
| 329 | S | 0.695 | 0.308        | 0.351        |
| 330 | E | 0.694 | 0.766        | 0.329        |
| 331 | A | 0.694 | 0.264        | 0.369        |
| 332 | T | 0.695 | 0.279        | 0.414        |
| 333 | F | 0.695 | 0.271        | 0.377        |
| 334 | E | 0.695 | 0.270        | 0.375        |
| 335 | L | 0.695 | 0.316        | 0.509        |
| 336 | K | 0.695 | 0.273        | 0.387        |
| 337 | A | 0.695 | <b>3.879</b> | 0.414        |
| 338 | A | 0.695 | 0.277        | 0.404        |
| 339 | P | 0.695 | 0.278        | 0.404        |
| 340 | W | 0.695 | 0.302        | 0.478        |
| 341 | L | 0.695 | 0.278        | 0.412        |
| 342 | K | 0.694 | <b>3.985</b> | 1.626        |
| 343 | Y | 0.695 | 0.773        | 0.464        |
| 344 | L | 0.695 | 0.860        | 0.502        |
| 345 | N | 0.694 | 0.264        | 0.283        |
| 346 | E | 0.694 | 0.325        | 1.749        |
| 347 | K | 0.695 | 0.273        | 0.387        |
| 348 | L | 0.693 | <b>4.030</b> | 1.645        |
| 349 | V | 0.694 | 0.300        | 1.597        |
| 350 | T | 0.695 | 0.279        | 0.414        |
| 351 | V | 0.694 | 0.300        | 1.597        |
| 352 | K | 0.694 | 1.235        | 1.691        |
| 353 | F | 0.694 | 0.293        | 1.653        |
| 354 | Q | 0.695 | 0.627        | 1.882        |
| 355 | D | 0.694 | 0.263        | 0.274        |
| 356 | V | 0.694 | 0.368        | 0.372        |
| 357 | E | 0.695 | 0.379        | 0.375        |
| 358 | V | 0.694 | 0.300        | 0.281        |
| 359 | T | 0.695 | <b>3.921</b> | 1.787        |
| 360 | V | 0.694 | 0.268        | 0.444        |
| 361 | D | 0.695 | 1.931        | 0.476        |
| 362 | L | 0.695 | 0.605        | 0.549        |
| 363 | L | 0.695 | 0.563        | 0.556        |
| 364 | P | 0.695 | 0.294        | 0.556        |
| 365 | R | 0.695 | 0.270        | 0.475        |



|     |   |       |              |              |
|-----|---|-------|--------------|--------------|
| 366 | G | 0.755 | 0.268        | 0.450        |
| 367 | G | 0.694 | 0.266        | 0.437        |
| 368 | D | 0.695 | <b>1.977</b> | <b>1.974</b> |
| 369 | P | 0.695 | 0.293        | 0.555        |
| 370 | I | 0.694 | 0.327        | 0.365        |
| 371 | S | 0.695 | 0.492        | 0.557        |
| 372 | L | 0.695 | 1.800        | 0.515        |
| 373 | F | 0.694 | 0.341        | 0.396        |
| 374 | S | 0.694 | 0.359        | 0.421        |
| 375 | M | 0.693 | 0.311        | 0.337        |
| 376 | L | 0.695 | 0.485        | 0.559        |
| 377 | M | 0.693 | 0.311        | 0.337        |
| 378 | N | 0.695 | 0.413        | 0.481        |
| 379 | V | 0.694 | 0.386        | 0.444        |
| 380 | S | 0.695 | 0.404        | 0.462        |
| 381 | V | 0.695 | 1.860        | <b>2.554</b> |
| 382 | E | 0.695 | <b>3.758</b> | <b>1.988</b> |
| 383 | A | 0.694 | <b>3.659</b> | 0.454        |
| 384 | V | 0.694 | <b>3.653</b> | 1.871        |
| 385 | H | 0.694 | 0.378        | 1.867        |
| 386 | I | 0.694 | 0.394        | 0.462        |
| 387 | A | 0.694 | 0.348        | 0.401        |
| 388 | L | 0.695 | 0.441        | 0.481        |
| 389 | I | 0.694 | 1.095        | <b>2.347</b> |
| 390 | D | 0.695 | 0.400        | 0.476        |
| 391 | G | 0.694 | 0.370        | 0.437        |
| 392 | V | 0.755 | 1.860        | <b>1.952</b> |
| 393 | A | 0.695 | 1.906        | <b>1.962</b> |
| 394 | H | 0.694 | 0.378        | 0.448        |
| 395 | A | 0.694 | 0.391        | 0.454        |
| 396 | N | 0.694 | 0.343        | 0.397        |
| 397 | L | 0.695 | 0.441        | 0.515        |
| 398 | D | 0.694 | 0.335        | 0.388        |
| 399 | S | 0.695 | 0.393        | 0.462        |
| 400 | V | 0.694 | 0.345        | 0.391        |
| 401 | D | 0.694 | 0.335        | 0.388        |
| 402 | T | 0.694 | 1.328        | 0.410        |
| 403 | N | 0.694 | <b>3.864</b> | 0.397        |
| 404 | V | 0.694 | 1.467        | 0.444        |
| 405 | S | 0.695 | 0.434        | 0.452        |
| 406 | V | 0.695 | 0.430        | 0.498        |
| 407 | T | 0.695 | 0.443        | 0.516        |
| 408 | S | 0.695 | 0.490        | 0.549        |
| 409 | S | 0.695 | 0.528        | 0.586        |
| 410 | R | 0.695 | 0.426        | 0.499        |
| 411 | I | 0.694 | 0.394        | 0.462        |
| 412 | D | 0.694 | 0.335        | 0.388        |
| 413 | G | 0.695 | 0.466        | 0.537        |
| 414 | L | 0.695 | 0.483        | 0.549        |

|     |   |       |              |              |
|-----|---|-------|--------------|--------------|
| 415 | D | 0.755 | 1.698        | 0.476        |
| 416 | S | 0.695 | 0.528        | 0.586        |
| 417 | S | 0.695 | 0.434        | 0.452        |
| 418 | T | 0.755 | 1.852        | <b>1.958</b> |
| 419 | M | 0.693 | 0.311        | 0.337        |
| 420 | N | 0.695 | 0.413        | 0.486        |
| 421 | T | 0.695 | 0.443        | 0.516        |
| 422 | K | 0.695 | 0.417        | 1.934        |
| 423 | I | 0.694 | 0.327        | 0.249        |
| 424 | R | 0.695 | 0.426        | 0.386        |
| 425 | D | 0.694 | 0.335        | 0.269        |
| 426 | L | 0.695 | 0.441        | 0.407        |
| 427 | I | 0.694 | 0.394        | 0.347        |
| 428 | N | 0.695 | 0.413        | 0.372        |
| 429 | G | -     | -            | -            |
| 430 | M | -     | -            | -            |
| 431 | V | -     | -            | -            |
| 432 | L | -     | -            | -            |
| 433 | P | -     | -            | -            |
| 434 | L | -     | -            | -            |
| 435 | L | -     | -            | -            |
| 436 | N | -     | -            | -            |
| 437 | F | -     | -            | -            |
| 438 | K | -     | -            | -            |
| 439 | R | -     | -            | -            |
| 440 | Y | 0.695 | 0.408        | 0.366        |
| 441 | A | 0.695 | 1.888        | 1.787        |
| 442 | F | 0.694 | 0.341        | 0.276        |
| 443 | P | 0.695 | 0.466        | 0.427        |
| 444 | A | 0.694 | 0.324        | 1.537        |
| 445 | P | 0.695 | 0.427        | 0.456        |
| 446 | F | 0.695 | 0.360        | 0.372        |
| 447 | D | 0.695 | 0.354        | 0.362        |
| 448 | L | 0.695 | 0.385        | 0.407        |
| 449 | S | 0.695 | 1.549        | 1.731        |
| 450 | G | 0.695 | <b>3.694</b> | <b>2.402</b> |
| 451 | M | 0.694 | <b>4.055</b> | <b>2.612</b> |
| 452 | H | 0.695 | 0.397        | 0.426        |
| 453 | L | 0.695 | 1.768        | 1.845        |
| 454 | N | 0.694 | 0.314        | 0.278        |
| 455 | I | 0.694 | 0.313        | 0.249        |
| 456 | T | 0.695 | 1.572        | 0.409        |
| 457 | T | 0.694 | 1.282        | 1.616        |
| 458 | E | 0.695 | 0.356        | 0.370        |
| 459 | G | 0.695 | 1.943        | <b>2.530</b> |
| 460 | G | 0.694 | <b>3.543</b> | <b>2.298</b> |
| 461 | I | 0.694 | 1.195        | 1.673        |
| 462 | A | 0.694 | 0.353        | 0.339        |
| 463 | G | 0.695 | 0.416        | 0.450        |

|     |   |       |       |       |
|-----|---|-------|-------|-------|
| 464 | V | 0.694 | 1.205 | 1.562 |
| 465 | D | 0.695 | 1.325 | 1.710 |
| 466 | L | 0.694 | 0.336 | 0.315 |
| 467 | V | 0.695 | 0.386 | 0.369 |
| 468 | R | 0.756 | 0.492 | 0.521 |
| 469 | A | 0.694 | 0.324 | 0.283 |
| 470 | L | 0.694 | 0.336 | 0.315 |
| 471 | G | 0.695 | 1.686 | 0.398 |
| 472 | S | 0.695 | 0.465 | 0.498 |
| 473 | L | 0.695 | 0.408 | 0.429 |
| 474 | S | 0.694 | 1.003 | 0.301 |
| 475 | I | 0.694 | 0.329 | 0.299 |
| 476 | L | 0.695 | 0.408 | 0.429 |
| 477 | P | 0.695 | 0.346 | 0.343 |
| 478 | H | 0.695 | 0.397 | 1.838 |
| 479 | L | 0.695 | 0.408 | 0.429 |
| 480 | R | 0.696 | 0.531 | 0.564 |

### C) ESAG2

| codon | AA | Tbg          | Tbr   | Teq          | region |
|-------|----|--------------|-------|--------------|--------|
| 1     | M  | 0.183        | 0.062 | 0.218        | SP     |
| 2     | R  | 0.198        | 0.063 | 0.218        | SP     |
| 3     | C  | 0.199        | 0.999 | 0.220        | SP     |
| 4     | E  | 1.094        | 0.133 | 0.254        | SP     |
| 5     | I  | 0.204        | 0.972 | 0.219        | SP     |
| 6     | V  | 0.223        | 0.070 | 0.221        | SP     |
| 7     | I  | <b>2.304</b> | 1.002 | <b>2.783</b> | SP     |
| 8     | A  | <b>2.237</b> | 1.158 | 0.904        | SP     |
| 9     | V  | 1.130        | 0.096 | 0.220        | SP     |
| 10    | G  | 0.207        | 0.066 | 0.224        | SP     |
| 11    | V  | <b>3.100</b> | 1.200 | 0.767        | SP     |
| 12    | F  | 0.214        | 0.068 | 0.219        | SP     |
| 13    | V  | <b>3.489</b> | 1.091 | 0.276        | SP     |
| 14    | A  | 0.185        | 0.062 | 0.219        | SP     |
| 15    | V  | 0.184        | 0.064 | 0.220        | SP     |
| 16    | L  | 0.296        | 0.121 | 0.236        | SP     |
| 17    | S  | 0.230        | 1.005 | 0.355        | SP     |
| 18    | P  | 0.238        | 0.990 | 0.253        | SP     |
| 19    | S  | 0.321        | 0.718 | 0.223        | SP     |
| 20    | F  | 0.214        | 0.989 | 0.253        | SP     |
| 21    | Q  | 0.263        | 0.719 | 0.426        | SP     |
| 22    | S  | 0.162        | 0.801 | 0.802        |        |
| 23    | D  | 0.149        | 1.004 | 0.457        |        |
| 24    | L  | 0.280        | 0.999 | 0.424        |        |

|    |   |       |       |              |
|----|---|-------|-------|--------------|
| 25 | G | -     | -     | -            |
| 26 | S | -     | -     | -            |
| 27 | F | -     | -     | -            |
| 28 | K | -     | -     | -            |
| 29 | W | -     | -     | -            |
| 30 | S | -     | -     | -            |
| 31 | T | -     | -     | -            |
| 32 | E | -     | -     | -            |
| 33 | L | -     | -     | -            |
| 34 | I | -     | -     | -            |
| 35 | D | 0.221 | 0.062 | 0.263        |
| 36 | W | 0.284 | 1.059 | 0.344        |
| 37 | S | 0.246 | 1.120 | 0.388        |
| 38 | K | 0.185 | 0.413 | 0.492        |
| 39 | I | 0.184 | 0.898 | 0.288        |
| 40 | T | 0.237 | 0.491 | 0.238        |
| 41 | D | 0.191 | 0.906 | 0.254        |
| 42 | Y | 0.295 | 0.682 | 0.267        |
| 43 | I | 0.178 | 0.517 | 0.294        |
| 44 | G | 0.149 | 0.990 | 0.350        |
| 45 | D | 0.184 | 1.050 | 0.430        |
| 46 | G | 0.162 | 1.033 | 0.366        |
| 47 | Y | 0.199 | 0.107 | 0.232        |
| 48 | K | 0.185 | 1.027 | <b>2.700</b> |
| 49 | H | 0.271 | 0.558 | 0.269        |
| 50 | H | 0.187 | 0.079 | 0.231        |
| 51 | N | 0.223 | 0.100 | 0.254        |
| 52 | A | 0.185 | 0.303 | 0.287        |
| 53 | G | 0.168 | 0.479 | 0.248        |
| 54 | E | 0.184 | 0.215 | 0.391        |
| 55 | F | 0.294 | 0.114 | 0.227        |
| 56 | E | 0.184 | 0.215 | 0.391        |
| 57 | T | 1.515 | 0.990 | 0.461        |
| 58 | L | 0.298 | 0.180 | 0.236        |
| 59 | C | 0.299 | 0.190 | 0.231        |
| 60 | K | 0.185 | 0.076 | 0.221        |
| 61 | I | 0.178 | 0.074 | 0.220        |
| 62 | Y | 0.295 | 0.183 | 0.235        |
| 63 | R | 0.211 | 0.095 | 0.219        |
| 64 | I | 0.190 | 0.086 | 0.220        |
| 65 | T | 0.226 | 0.098 | 0.220        |
| 66 | Q | 0.255 | 0.139 | 0.227        |
| 67 | A | 0.222 | 0.085 | 0.222        |
| 68 | E | 0.191 | 0.083 | 0.222        |
| 69 | A | 0.195 | 0.986 | <b>3.476</b> |
| 70 | P | 0.210 | 0.170 | 0.229        |
| 71 | Q | 0.185 | 0.151 | 0.227        |
| 72 | P | 0.160 | 0.118 | 0.220        |
| 73 | S | 0.252 | 0.840 | 0.243        |

|     |   |              |              |              |
|-----|---|--------------|--------------|--------------|
| 74  | F | 0.136        | 0.095        | 0.220        |
| 75  | E | 1.160        | 0.827        | 0.253        |
| 76  | N | 0.079        | 0.064        | 0.221        |
| 77  | R | 0.201        | 0.157        | 0.228        |
| 78  | E | 0.109        | 0.217        | 0.222        |
| 79  | K | 0.787        | 0.071        | 0.286        |
| 80  | E | 0.116        | 0.077        | 0.222        |
| 81  | N | <b>4.514</b> | <b>4.296</b> | <b>6.560</b> |
| 82  | E | 0.109        | 0.071        | 0.222        |
| 83  | I | 0.103        | 0.069        | 0.220        |
| 84  | L | <b>3.147</b> | 1.005        | 0.218        |
| 85  | N | 0.087        | 0.998        | 0.490        |
| 86  | K | 0.110        | 0.074        | 0.254        |
| 87  | L | 0.204        | 0.148        | 0.326        |
| 88  | E | 0.109        | 0.071        | 0.255        |
| 89  | E | 0.116        | 0.077        | 0.260        |
| 90  | M | 0.106        | 0.068        | 0.250        |
| 91  | V | 0.126        | 0.072        | 0.254        |
| 92  | R | <b>2.084</b> | 0.095        | 0.277        |
| 93  | E | 0.109        | 0.073        | 0.255        |
| 94  | T | 1.691        | 1.039        | 0.284        |
| 95  | E | 0.117        | 0.074        | 0.260        |
| 96  | A | 0.108        | 0.071        | 0.252        |
| 97  | V | 0.415        | 0.131        | 0.407        |
| 98  | G | 0.415        | 0.092        | 0.407        |
| 99  | A | 0.825        | 0.865        | 0.252        |
| 100 | G | 0.682        | 0.987        | 0.241        |
| 101 | G | 0.269        | 0.360        | 0.299        |
| 102 | N | 0.190        | 0.895        | 0.253        |
| 103 | K | 1.039        | 0.958        | 0.319        |
| 104 | G | 1.463        | 0.800        | 0.278        |
| 105 | S | 1.233        | 1.465        | 0.326        |
| 106 | N | 0.142        | 0.826        | 0.289        |
| 107 | K | 1.216        | 1.015        | 0.258        |
| 108 | S | 1.178        | 0.165        | 0.319        |
| 109 | A | 0.960        | 0.920        | 0.285        |
| 110 | K | 0.863        | 0.922        | 0.278        |
| 111 | S | 0.993        | 1.058        | 0.340        |
| 112 | T | 0.150        | 0.951        | 0.276        |
| 113 | T | 0.149        | 0.089        | 0.276        |
| 114 | A | 0.151        | 0.087        | 0.275        |
| 115 | Y | 0.123        | 0.080        | 0.267        |
| 116 | Q | 0.177        | 0.542        | 0.312        |
| 117 | E | 0.109        | 0.071        | 0.255        |
| 118 | I | 0.127        | 0.079        | 0.260        |
| 119 | R | <b>3.352</b> | 1.010        | 1.183        |
| 120 | K | 1.424        | 0.077        | 0.259        |
| 121 | L | 0.195        | 0.167        | 0.338        |
| 122 | F | 1.361        | 0.087        | 0.277        |

|     |   |       |              |       |
|-----|---|-------|--------------|-------|
| 123 | E | 0.109 | 0.071        | 0.255 |
| 124 | K | 0.780 | 0.071        | 1.103 |
| 125 | A | 0.147 | 0.087        | 0.275 |
| 126 | K | 0.117 | 0.243        | 0.260 |
| 127 | A | 0.111 | <b>2.007</b> | 0.260 |
| 128 | L | 0.223 | 0.817        | 0.338 |
| 129 | K | 0.110 | 0.090        | 0.254 |
| 130 | E | 0.116 | 0.100        | 0.260 |
| 131 | E | 0.116 | 0.510        | 0.260 |
| 132 | I | 0.116 | 0.458        | 0.251 |
| 133 | E | 0.113 | 0.090        | 0.255 |
| 134 | V | 0.150 | 0.562        | 0.275 |
| 135 | N | 0.079 | 0.080        | 0.239 |
| 136 | R | 0.121 | 0.102        | 0.257 |
| 137 | T | 0.160 | 0.152        | 0.284 |
| 138 | R | 0.117 | 0.489        | 0.259 |
| 139 | S | 0.200 | 0.741        | 0.298 |
| 140 | L | 0.217 | 0.218        | 0.334 |
| 141 | N | 0.079 | 0.072        | 0.239 |
| 142 | A | 0.158 | 0.144        | 0.283 |
| 143 | S | 0.087 | 0.304        | 0.239 |
| 144 | R | 0.863 | 0.632        | 1.499 |
| 145 | S | 0.152 | 0.667        | 1.927 |
| 146 | A | 0.108 | 0.092        | 0.252 |
| 147 | Q | 0.185 | <b>4.666</b> | 0.320 |
| 148 | E | 0.116 | 1.062        | 0.260 |
| 149 | N | 0.079 | 0.072        | 0.239 |
| 150 | M | 0.106 | 0.388        | 1.111 |
| 151 | L | 0.223 | 0.215        | 0.338 |
| 152 | R | 0.133 | 0.124        | 0.265 |
| 153 | A | 0.108 | 0.092        | 0.252 |
| 154 | V | 0.147 | 0.122        | 0.275 |
| 155 | Y | 0.123 | 0.110        | 0.267 |
| 156 | G | 0.190 | 0.114        | 0.299 |
| 157 | D | 0.144 | 0.128        | 0.278 |
| 158 | A | 0.108 | 0.092        | 0.252 |
| 159 | V | 0.147 | 0.122        | 0.275 |
| 160 | D | 0.080 | 0.072        | 1.114 |
| 161 | V | 0.147 | 0.122        | 0.275 |
| 162 | A | 0.158 | 0.146        | 0.283 |
| 163 | R | 0.133 | 0.124        | 0.265 |
| 164 | N | 0.079 | 0.072        | 0.239 |
| 165 | E | 0.109 | 0.089        | 0.255 |
| 166 | N | 0.079 | 0.072        | 0.239 |
| 167 | K | 0.117 | 0.494        | 0.259 |
| 168 | T | 0.111 | 0.106        | 0.253 |
| 169 | L | 0.223 | 0.216        | 0.338 |
| 170 | E | 0.109 | 0.091        | 0.255 |
| 171 | E | 0.867 | 1.013        | 0.260 |

|     |   |              |              |              |
|-----|---|--------------|--------------|--------------|
| 172 | A | 0.207        | 0.197        | 0.314        |
| 173 | M | 0.106        | 0.088        | 0.250        |
| 174 | R | 0.133        | 0.118        | 0.265        |
| 175 | G | 0.145        | 0.613        | 0.270        |
| 176 | N | 0.146        | 0.131        | 0.278        |
| 177 | K | 0.117        | 0.104        | 0.262        |
| 178 | S | 0.230        | <b>2.593</b> | 0.238        |
| 179 | L | 0.223        | 0.166        | 0.240        |
| 180 | L | 0.211        | 0.156        | 0.235        |
| 181 | F | 0.219        | 0.164        | 0.236        |
| 182 | N | 0.079        | 0.062        | 0.220        |
| 183 | S | 0.087        | 0.508        | 0.218        |
| 184 | V | 1.182        | 0.879        | 0.307        |
| 185 | D | 0.080        | 0.066        | 0.221        |
| 186 | N | 1.547        | 0.684        | 1.179        |
| 187 | A | 0.158        | 0.092        | 0.221        |
| 188 | G | 1.035        | 0.998        | 0.514        |
| 189 | T | 0.992        | 0.813        | 0.344        |
| 190 | S | 0.087        | 0.066        | 0.218        |
| 191 | C | 0.146        | 0.163        | 0.228        |
| 192 | G | 0.096        | 0.067        | 0.219        |
| 193 | S | 0.150        | 0.105        | 0.224        |
| 194 | Y | 0.993        | 0.386        | 0.221        |
| 195 | G | 0.143        | 0.090        | 0.219        |
| 196 | E | 0.142        | 0.877        | 0.222        |
| 197 | K | 0.108        | 0.069        | 0.220        |
| 198 | L | <b>2.115</b> | 1.142        | <b>3.294</b> |
| 199 | V | 0.106        | 0.069        | 0.220        |
| 200 | G | 0.143        | 0.090        | 0.219        |
| 201 | M | 0.106        | 0.171        | 0.220        |
| 202 | T | 0.915        | 0.100        | 0.221        |
| 203 | L | 0.236        | 0.187        | 0.244        |
| 204 | I | 0.175        | 0.079        | 0.220        |
| 205 | N | 0.075        | 0.062        | 0.219        |
| 206 | D | 0.142        | 0.085        | 0.222        |
| 207 | F | 0.134        | 0.086        | 0.220        |
| 208 | F | 0.217        | 0.164        | 0.234        |
| 209 | C | 0.137        | 0.113        | 0.228        |
| 210 | L | 0.235        | 0.186        | 0.239        |
| 211 | C | 0.131        | 0.083        | 0.219        |
| 212 | V | 0.144        | 0.083        | 0.221        |
| 213 | G | 0.143        | 0.090        | 0.220        |
| 214 | E | 0.108        | 0.067        | 0.220        |
| 215 | A | -            | -            | -            |
| 216 | I | -            | -            | -            |
| 217 | N | -            | -            | -            |
| 218 | V | -            | -            | -            |
| 219 | T | -            | -            | -            |
| 220 | D | -            | -            | -            |

|     |   |              |       |              |
|-----|---|--------------|-------|--------------|
| 221 | E | -            | -     | -            |
| 222 | M | -            | -     | -            |
| 223 | R | -            | -     | -            |
| 224 | Q | -            | -     | -            |
| 225 | K | -            | -     | -            |
| 226 | K | -            | -     | -            |
| 227 | E | -            | -     | -            |
| 228 | E | -            | -     | -            |
| 229 | E | -            | -     | -            |
| 230 | E | -            | -     | -            |
| 231 | K | -            | -     | -            |
| 232 | K | -            | -     | -            |
| 233 | E | -            | -     | -            |
| 234 | G | -            | -     | -            |
| 235 | G | -            | -     | -            |
| 236 | K | -            | -     | -            |
| 237 | Y | -            | -     | -            |
| 238 | S | -            | -     | -            |
| 239 | D | -            | -     | -            |
| 240 | S | -            | -     | -            |
| 241 | V | -            | -     | -            |
| 242 | Y | 0.068        | 0.076 | 0.220        |
| 243 | N | 0.047        | 0.061 | 0.219        |
| 244 | G | 0.660        | 0.164 | 0.258        |
| 245 | F | <b>4.062</b> | 0.900 | <b>6.082</b> |
| 246 | N | 0.061        | 0.061 | 0.222        |
| 247 | C | 0.072        | 0.068 | 0.219        |
| 248 | P | 0.104        | 0.084 | 0.227        |
| 249 | C | 0.072        | 0.068 | 0.219        |
| 250 | R | 0.597        | 0.162 | 0.247        |
| 251 | D | 0.047        | 0.061 | 0.219        |
| 252 | E | 0.744        | 1.004 | 0.222        |
| 253 | I | 0.069        | 0.065 | 0.219        |
| 254 | R | 0.069        | 0.068 | 0.219        |
| 255 | R | 0.073        | 0.069 | 0.219        |
| 256 | P | 0.132        | 0.123 | 0.228        |
| 257 | K | 0.997        | 0.141 | 0.247        |
| 258 | N | 0.325        | 0.385 | 0.218        |
| 259 | G | 0.051        | 0.073 | 0.218        |
| 260 | S | 0.395        | 0.061 | 0.218        |
| 261 | W | 0.140        | 0.118 | 0.232        |
| 262 | T | 0.142        | 0.094 | 0.232        |
| 263 | M | 0.055        | 0.062 | 0.218        |
| 264 | M | 0.055        | 0.062 | 0.218        |
| 265 | A | 0.059        | 0.066 | 0.219        |
| 266 | E | 0.062        | 1.134 | 0.221        |
| 267 | Y | 0.714        | 1.016 | 0.246        |
| 268 | C | 0.072        | 0.077 | 0.220        |
| 269 | E | 0.062        | 0.906 | 0.232        |



|     |   |              |              |              |
|-----|---|--------------|--------------|--------------|
| 270 | G | 0.092        | 0.076        | 0.228        |
| 271 | N | 0.525        | 0.980        | 0.237        |
| 272 | S | 0.079        | 0.996        | 0.285        |
| 273 | - | 0.415        | 0.442        | 0.407        |
| 274 | S | 0.907        | 1.477        | 0.291        |
| 275 | P | 1.079        | 1.194        | 0.280        |
| 276 | C | 0.120        | 0.070        | 0.218        |
| 277 | N | 1.819        | 0.956        | 0.778        |
| 278 | P | 0.186        | 0.103        | 0.224        |
| 279 | E | 1.688        | 0.591        | 0.653        |
| 280 | D | 1.599        | 0.840        | 0.311        |
| 281 | I | 0.115        | 0.179        | 0.223        |
| 282 | K | 0.106        | 0.187        | 0.240        |
| 283 | Y | 0.209        | 0.089        | 0.223        |
| 284 | N | 0.115        | 0.729        | 0.233        |
| 285 | H | 1.108        | 0.994        | 0.962        |
| 286 | T | 0.116        | 0.065        | 0.221        |
| 287 | E | 0.757        | 0.444        | 0.357        |
| 288 | A | 0.145        | 0.174        | 0.226        |
| 289 | W | 0.195        | 0.234        | 0.250        |
| 290 | D | 0.074        | 0.084        | 0.222        |
| 291 | V | 0.135        | 0.147        | 0.224        |
| 292 | I | 0.092        | 0.107        | 0.220        |
| 293 | S | 0.077        | 0.095        | 0.218        |
| 294 | K | 0.887        | 1.052        | 0.364        |
| 295 | A | 0.097        | <b>4.363</b> | 0.220        |
| 296 | C | 0.186        | 0.213        | 0.239        |
| 297 | V | 0.135        | 0.147        | 0.224        |
| 298 | Y | 0.209        | 0.244        | 0.251        |
| 299 | K | 0.104        | 0.116        | 0.223        |
| 300 | S | 0.073        | 0.354        | 0.221        |
| 301 | V | 0.745        | 1.367        | 0.311        |
| 302 | A | 1.017        | <b>4.478</b> | 0.680        |
| 303 | S | 0.200        | 0.226        | 0.244        |
| 304 | N | 0.075        | 0.085        | 0.221        |
| 305 | V | 0.144        | 0.173        | 0.227        |
| 306 | K | 0.099        | 0.110        | 0.222        |
| 307 | T | 0.098        | 0.118        | 0.220        |
| 308 | L | 0.188        | 0.224        | 0.246        |
| 309 | K | 0.106        | 0.127        | 0.222        |
| 310 | S | 0.076        | 0.095        | 0.218        |
| 311 | A | 0.929        | 0.727        | 0.497        |
| 312 | L | 0.221        | 0.255        | 0.266        |
| 313 | A | 0.096        | 0.115        | 0.220        |
| 314 | E | 1.723        | 1.065        | 0.718        |
| 315 | F | 0.121        | 0.150        | 0.223        |
| 316 | D | 0.659        | 0.348        | 0.288        |
| 317 | D | <b>5.181</b> | 1.626        | <b>6.446</b> |
| 318 | L | 0.235        | 0.229        | 0.269        |

|     |   |       |              |              |
|-----|---|-------|--------------|--------------|
| 319 | V | 0.138 | 0.147        | 0.228        |
| 320 | N | 0.075 | 0.085        | 0.221        |
| 321 | L | 0.188 | 0.224        | 0.246        |
| 322 | E | 0.105 | 0.125        | 0.223        |
| 323 | Q | 0.160 | 0.195        | 0.235        |
| 324 | D | 0.076 | 0.084        | 0.222        |
| 325 | K | 0.106 | 0.587        | 0.222        |
| 326 | Y | 0.110 | 0.135        | 0.223        |
| 327 | Q | 0.160 | 0.195        | 0.235        |
| 328 | V | 0.134 | 0.147        | 0.224        |
| 329 | R | 0.752 | 0.517        | 0.360        |
| 330 | G | 0.103 | 0.098        | 0.219        |
| 331 | I | 0.092 | 0.498        | 0.219        |
| 332 | F | 1.855 | 1.486        | 0.362        |
| 333 | G | 0.080 | 0.098        | 0.218        |
| 334 | Y | 0.108 | 0.135        | 0.219        |
| 335 | V | 0.131 | 0.147        | 0.220        |
| 336 | K | 0.747 | 0.630        | 0.243        |
| 337 | T | 0.139 | 0.703        | 0.222        |
| 338 | E | 0.700 | 0.445        | 0.275        |
| 339 | N | 0.773 | 0.636        | <b>3.218</b> |
| 340 | N | 0.130 | 0.157        | 0.220        |
| 341 | D | 1.016 | 0.936        | 0.557        |
| 342 | N | 0.068 | 0.085        | 0.220        |
| 343 | R | 1.235 | 0.890        | 0.484        |
| 344 | T | 1.031 | 0.789        | 0.388        |
| 345 | C | 0.209 | 0.251        | 0.226        |
| 346 | T | 0.143 | 0.160        | 0.221        |
| 347 | G | 0.080 | 0.325        | 0.218        |
| 348 | H | 0.131 | 0.099        | 0.219        |
| 349 | T | 0.112 | 0.129        | 0.221        |
| 350 | A | 0.094 | 0.105        | 0.219        |
| 351 | G | 0.130 | 0.132        | 0.219        |
| 352 | F | 0.203 | 0.216        | 0.227        |
| 353 | T | 0.144 | 0.128        | 0.220        |
| 354 | C | 0.785 | 0.123        | 0.218        |
| 355 | V | 0.157 | 0.166        | 0.221        |
| 356 | S | 0.074 | 0.079        | 0.237        |
| 357 | Y | 0.206 | 0.218        | 0.318        |
| 358 | K | 1.019 | 1.050        | 0.237        |
| 359 | H | 1.126 | <b>3.480</b> | 0.318        |
| 360 | T | 0.144 | 0.150        | 0.274        |
| 361 | L | 0.135 | 0.137        | 0.273        |
| 362 | E | 0.102 | 0.102        | 0.259        |
| 363 | N | 0.068 | 0.072        | 0.244        |
| 364 | G | 0.080 | 0.081        | 0.240        |
| 365 | G | 0.120 | 0.110        | 0.254        |
| 366 | I | 0.089 | 0.087        | 0.249        |
| 367 | P | 0.194 | 0.213        | 0.310        |

|     |   |              |       |              |
|-----|---|--------------|-------|--------------|
| 368 | W | 0.192        | 0.207 | 0.319        |
| 369 | Y | 0.206        | 0.218 | 0.318        |
| 370 | N | 0.068        | 0.072 | 0.244        |
| 371 | R | 1.426        | 1.202 | 1.684        |
| 372 | L | 0.135        | 0.137 | 0.273        |
| 373 | S | 1.154        | 1.004 | <b>2.061</b> |
| 374 | N | 0.130        | 0.129 | 0.270        |
| 375 | A | 0.094        | 0.092 | 0.250        |
| 376 | T | 0.159        | 0.106 | 0.275        |
| 377 | E | 0.095        | 0.408 | 0.256        |
| 378 | Q | 0.162        | 0.181 | 0.309        |
| 379 | L | 0.216        | 0.215 | 0.331        |
| 380 | Q | 0.170        | 0.187 | 0.306        |
| 381 | E | 0.102        | 0.102 | 0.259        |
| 382 | M | 0.092        | 0.087 | 0.246        |
| 383 | D | 1.197        | 0.072 | 0.246        |
| 384 | M | 0.824        | 1.039 | 0.263        |
| 385 | Y | 0.108        | 0.109 | 0.262        |
| 386 | A | 0.191        | 0.195 | 0.303        |
| 387 | K | 0.099        | 0.091 | 0.254        |
| 388 | E | 0.098        | 0.090 | 0.256        |
| 389 | A | 0.148        | 0.096 | 0.250        |
| 390 | D | 0.185        | 0.126 | 0.270        |
| 391 | S | 0.125        | 0.078 | 0.239        |
| 392 | H | 0.151        | 0.099 | 0.252        |
| 393 | L | 1.076        | 1.016 | 0.273        |
| 394 | H | 0.151        | 0.099 | 0.252        |
| 395 | E | 0.146        | 0.089 | 0.256        |
| 396 | L | 0.245        | 0.198 | 0.314        |
| 397 | E | 0.154        | 0.084 | 0.259        |
| 398 | E | 0.154        | 0.350 | 0.259        |
| 399 | Y | 0.262        | 0.192 | 0.318        |
| 400 | E | 0.154        | 0.405 | 0.259        |
| 401 | D | 0.111        | 0.177 | 0.246        |
| 402 | E | 0.146        | 0.076 | 0.256        |
| 403 | A | 0.198        | 0.120 | 0.275        |
| 404 | E | 0.146        | 0.076 | 0.256        |
| 405 | E | 0.154        | 0.084 | 0.259        |
| 406 | I | 0.167        | 0.089 | 0.254        |
| 407 | F | 0.178        | 0.100 | 0.268        |
| 408 | L | 0.192        | 0.531 | 0.273        |
| 409 | E | 0.146        | 0.076 | 0.256        |
| 410 | V | <b>3.980</b> | 0.931 | <b>5.778</b> |
| 411 | K | 0.148        | 0.076 | 0.254        |
| 412 | L | 0.194        | 0.176 | 0.273        |
| 413 | G | 0.132        | 0.070 | 0.240        |
| 414 | G | 0.132        | 0.070 | 0.240        |
| 415 | D | 0.111        | 0.066 | 0.246        |
| 416 | V | 0.187        | 0.933 | 0.267        |

|     |   |              |              |              |
|-----|---|--------------|--------------|--------------|
| 417 | E | 0.146        | 0.076        | 0.256        |
| 418 | L | 0.275        | 0.214        | 0.334        |
| 419 | W | 0.250        | 0.740        | 0.319        |
| 420 | K | 0.156        | 0.078        | 0.264        |
| 421 | S | 0.125        | 0.201        | 0.237        |
| 422 | S | 0.210        | 0.130        | 0.277        |
| 423 | Q | 0.227        | 0.706        | 0.306        |
| 424 | G | 0.132        | 0.070        | 0.240        |
| 425 | K | 0.148        | 0.274        | 0.254        |
| 426 | G | 0.132        | 0.196        | 0.240        |
| 427 | - | <b>2.557</b> | 0.999        | 0.355        |
| 428 | - | 1.242        | 1.033        | 0.360        |
| 429 | - | 1.816        | 0.994        | 0.372        |
| 430 | - | 0.138        | 0.093        | 0.360        |
| 431 | D | 0.111        | 0.172        | 0.246        |
| 432 | D | 1.150        | 1.003        | 0.667        |
| 433 | A | <b>3.531</b> | <b>4.889</b> | 1.310        |
| 434 | R | <b>4.977</b> | <b>5.220</b> | <b>5.934</b> |
| 435 | V | 0.197        | 0.566        | 0.276        |
| 436 | D | 0.779        | 0.962        | 0.246        |
| 437 | N | 0.112        | 0.065        | 0.244        |
| 438 | D | 0.111        | 0.066        | 0.246        |
| 439 | G | 0.175        | 0.088        | 0.254        |
| 440 | L | 0.192        | 0.124        | 0.273        |
| 441 | T | 0.151        | 0.087        | 0.250        |
| 442 | H | 0.151        | 0.090        | 0.252        |
| 443 | L | 0.245        | 0.183        | 0.314        |
| 444 | N | 0.112        | 0.071        | 0.244        |
| 445 | I | 0.859        | 0.328        | 0.249        |
| 446 | A | 1.132        | 0.133        | 0.275        |
| 447 | T | 0.151        | 0.087        | 0.250        |
| 448 | G | 0.171        | 0.079        | 0.254        |
| 449 | V | 0.132        | 0.420        | 0.240        |
| 450 | A | 0.178        | 1.063        | 0.268        |
| 451 | M | 0.201        | 0.522        | 0.274        |
| 452 | L | 0.262        | 0.211        | 0.325        |
| 453 | L | 0.262        | 0.211        | 0.325        |
| 454 | I | 0.147        | 1.036        | 0.253        |
| 455 | I | 0.262        | <b>5.004</b> | 0.325        |
| 456 | S | 0.292        | 0.902        | 0.335        |
| 457 | L | 0.192        | 0.124        | 0.273        |
| 458 | F | 0.141        | <b>2.805</b> | 0.249        |
| 459 | C | 0.175        | 0.111        | 0.260        |
| 460 | T | 0.190        | 0.517        | 0.267        |
| 461 | L | 0.192        | 0.124        | 1.493        |

Ratio of nonsynonymous-to-synonymous substitutions ( $\omega$ ) along ESAG6 (**A**), ESAG5 (**B**) and ESAG2 (**C**). Rates at individual codons are estimated by the mean of the posterior distribution of rates, using the prior distribution determined by the model M2a (selection model) parameters

listed in Table 6. See text for details. Estimates with  $\omega > 2$  are indicative of adaptive evolution and are highlighted in bold. The amino acid sequence shown for each locus is that of the ESAG6, ESAG5 and ESAG2 sequences from TAR clone F44 in *T. b. brucei* with gaps introduced by the alignment. Ambiguously-aligned regions were omitted from the analysis and are indicated by dashes (-). The signal peptide from each ESAG in TAR clone Tbb\_F44 was inferred using SignalP3.0 [S1] and is denoted SP in the table. The ESAG6 hypervariable region (HV) (residues 149-159) and box 1 (residues 209-215) and box 2 (residues 223-238) of the transferrin-binding region were assigned as in [39, 40].

- S1. Emanuelsson O, Brunak S, von Heijne G, Nielsen H: **Locating proteins in the cell using TargetP, SignalP and related tools.** *Nat Protoc* 2007, 2(4):953-971.
