# Supplementary material for: Isolation and analysis of the genetic diversity of repertoires of VSG expression site containing telomeres from Trypanosoma brucei gambiense, T. b. brucei and T. equiperdum
Source: PubMed Central journal article supplement (PMC2533676; doi:10.1186/1471-2164-9-385), 2008-08-12

**A****ESAG6 dN/dS ratios***T. b. gambiense*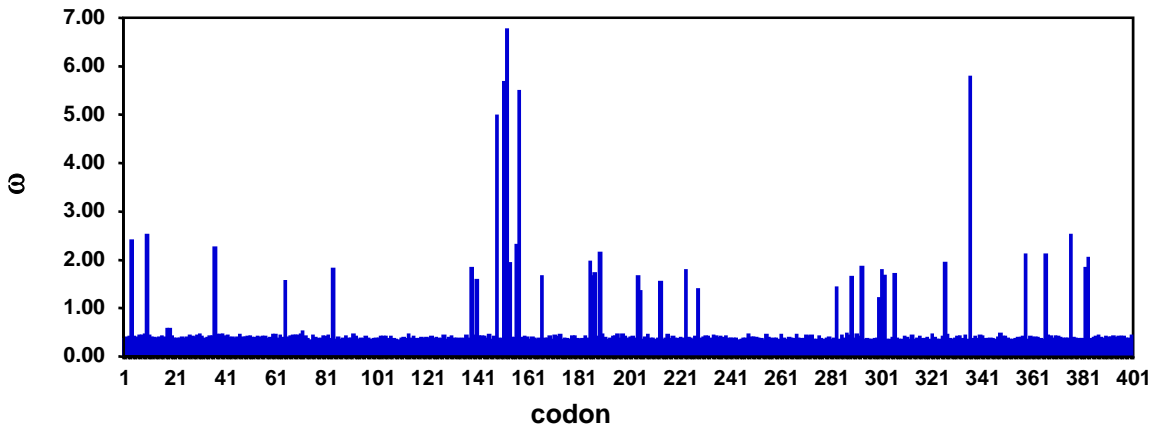*T. b. brucei*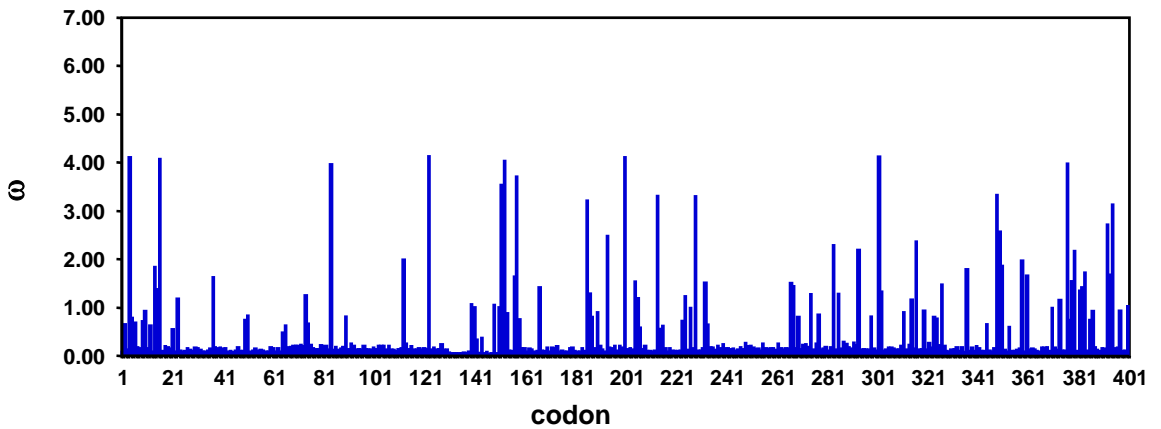*T. equiperdum*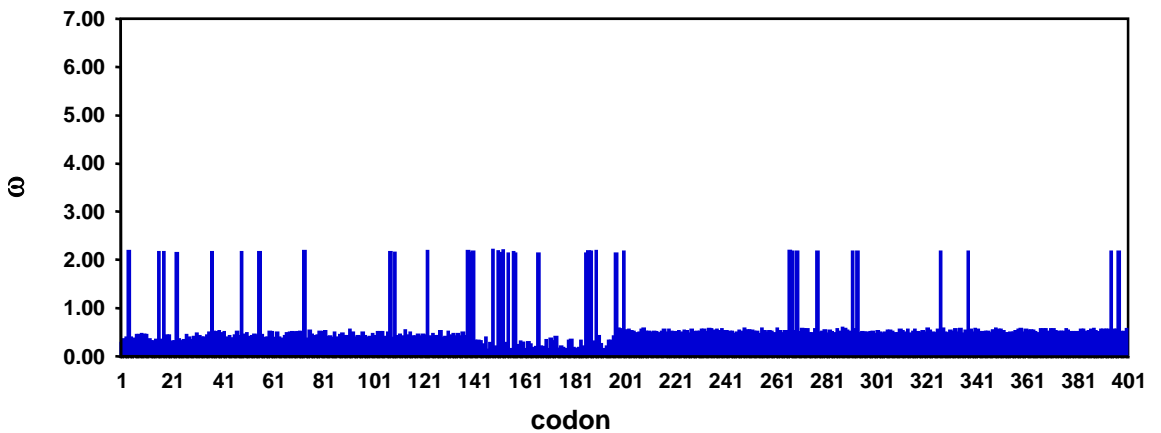

**B****ESAG5 dN/dS ratios***T. b. gambiense*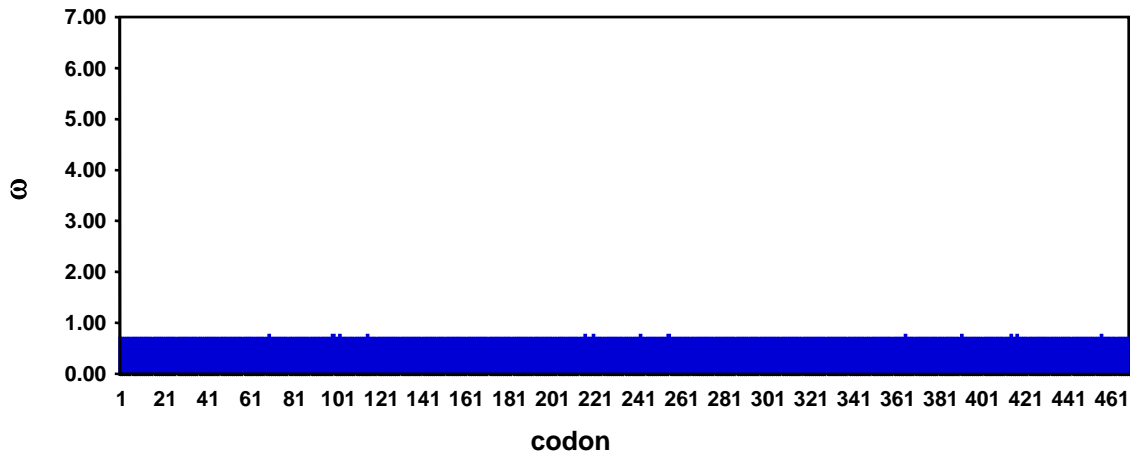*T. b. brucei*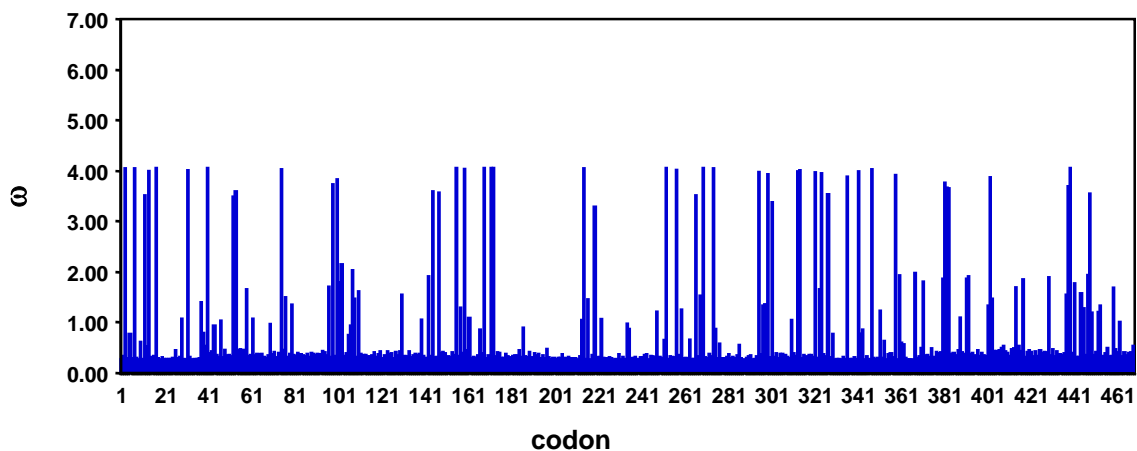*T. equiperdum*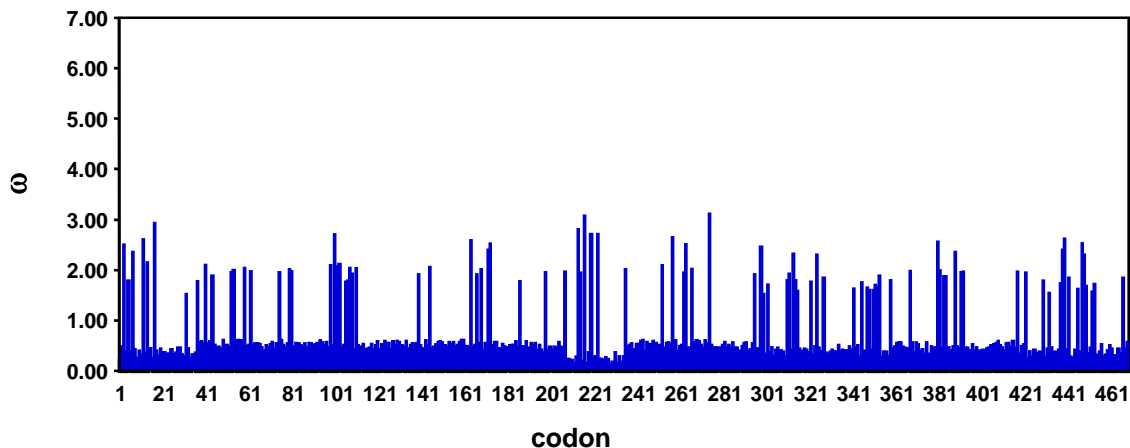

**C****ESAG2 dN/dS ratios***T. b. gambiense*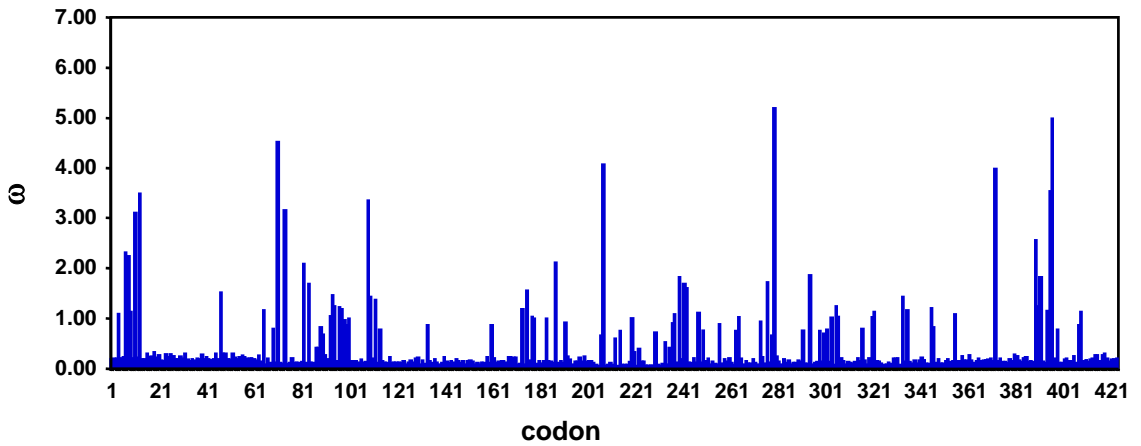*T. b. brucei*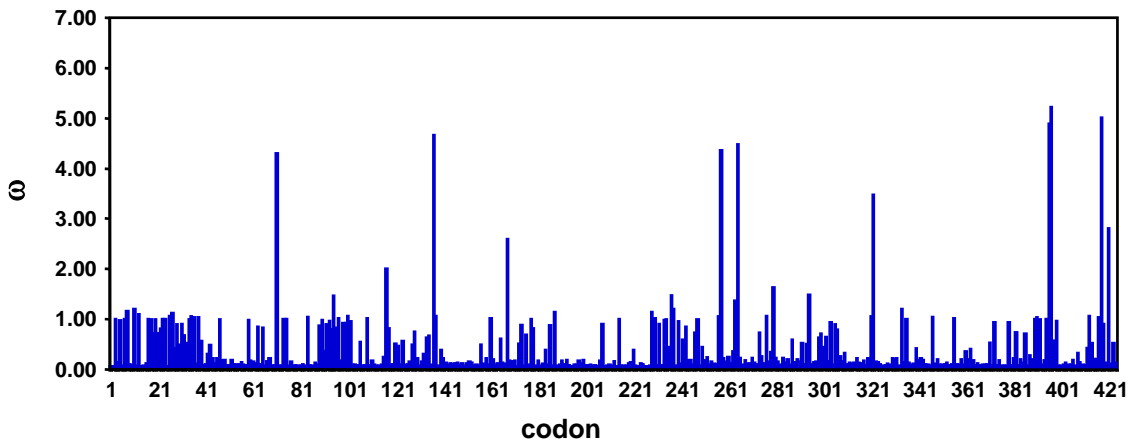*T. equiperdum*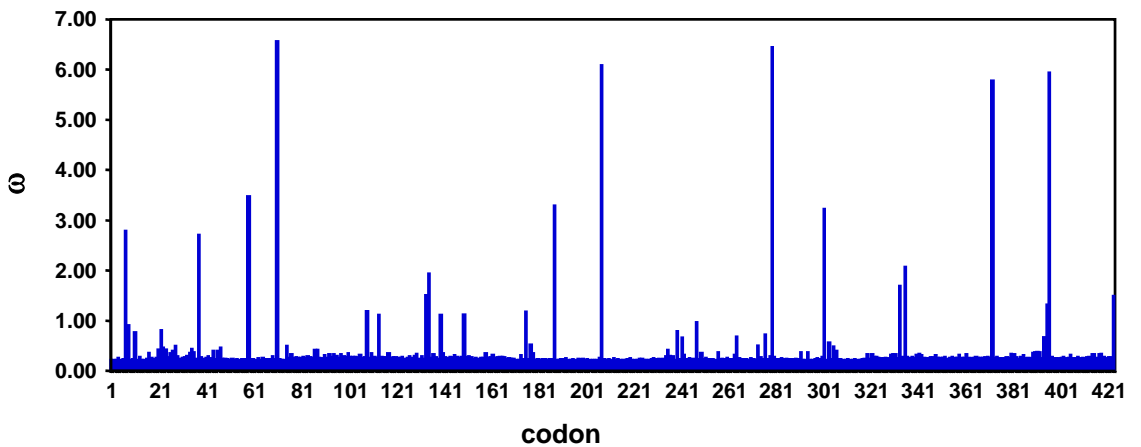

Supplement: 1471-2164-9-385-S8.pdf [file 1471-2164-9-385-S8.pdf]
