# Supplementary material for: Isolation and analysis of the genetic diversity of repertoires of VSG expression site containing telomeres from Trypanosoma brucei gambiense, T. b. brucei and T. equiperdum
Source: PubMed Central journal article supplement (PMC2533676; doi:10.1186/1471-2164-9-385), 2008-08-12
Supplement: 1471-2164-9-385-S9.pdf [file 1471-2164-9-385-S9.pdf]

**Supplementary Table 1**

**Primers used**

| <b>Primer</b> | <b>Sequence 5'-3'</b>     |
|---------------|---------------------------|
| <b>ESAG6</b>  |                           |
| ESAG6-UPSs    | GCTGYYGCCGAAATRGTAATC     |
| ESAG6-DNas    | CCRCTRGAAGACTTACGTTAC     |
| ESAG6-287s    | CAGTATTGAGGAATGAGTTTAC    |
| ESAG6/7-311s  | CCAGCAGGAGTTGGAGGAAATG    |
| ESAG6-652as   | CYTCCCATTTCTCCTCG         |
| ESAG6-796s    | GGTGATGCTACAGAGTACGG      |
| ESAG6-809as   | CGTACTCTGTAGCATCACCGTATTC |
| ESAG6-1045as  | GTTCACTCACTCTCTTTGACAG    |
| <b>ESAG5</b>  |                           |
| ESAG5-UPSs    | CTTYAGTTGCACTTAGTGTAGC    |
| ESAG5-DNas    | GGAAAGCAAGATAGGTTTGAGTG   |
| ESAG5-240s    | CSGTGTGAGTGTAGAAGAGAC     |
| ESAG5-578as   | CGCCAAGCCACTTAGGC         |
| ESAG5-827s    | CCTGTTGCTGTTGTTTCTTC      |
| ESAG5-1007as  | GTTCGAATGTRGCCTCAGAG      |
| <b>ESAG2</b>  |                           |
| ESAG2-UPS1s   | GGTTGCGCATGCTGTTTAC       |
| ESAG2-UPS2s   | ACAAGCTAGAAGTGTTTCT       |
| ESAG2-DN1as   | TATACCAAATAGACGCAGC       |
| ESAG2-DN3as   | CCAAATAGACGCAGCAACAAAG    |
| ESAG2-371s    | GAAACTGTTTGAGAAGGCG       |
| ESAG2-457s    | ATGTTGAGAGCTGTGTATGG      |
| ESAG2-871s    | AGTTGGACMATGATGGCTG       |
| ESAG2-505as   | TTCTTGCCACATCCACAGC       |
| ESAG2-900as   | ACTAATCACATCCCATGCC       |
| ESAG2-970as   | ACTAATCACATCCCATGC        |
| ESAG2-1088as  | TGACACATGTGAATCCCG        |

\*Degenerate nucleotides Y= C or T, R=A or G, M=A or C, S=G or C.
